# Supplementary material
Source: Frontiers journal article supplement (https://www.frontiersin.org/articles/163512)
Supplement: Table_1.XLSX [file Table_1.XLSX]

## Sheet: Supplementary Table 1
Supplementary Information Dataset 1: Global Proteome Spectral Count Data
#	Identified Proteins	Accession Number	Molecular Weight	7.5 μM Fe			170 μM Fe
				a	b	c	a	b	c
1	phycocyanin subunit beta [Synechococcus sp. PCC 7002]	gi|170078807	18 kDa	988.61	643.14	684.73	1134.1	760.01	768.03
2	phycocyanin subunit alpha [Synechococcus sp. PCC 7002]	gi|170078808	18 kDa	697.58	590.41	687.24	894.67	760.96	842.66
3	allophycocyanin subunit beta [Synechococcus sp. PCC 7002]	gi|170078534	17 kDa	214.98	216.51	246.1	260.51	237.8	265.46
4	allophycocyanin subunit alpha [Synechococcus sp. PCC 7002]	gi|170078535	17 kDa	165.26	181.36	245.26	351.29	205.46	248.45
5	elongation factor Tu [Synechococcus sp. PCC 7002]	gi|170078665	45 kDa	238.38	198.14	215.97	277.61	210.21	208.78
6	F0F1 ATP synthase subunit beta [Synechococcus sp. PCC 7002]	gi|170077372	52 kDa	229.6	170.17	180.81	234.19	204.51	205
7	phycobilisome core-membrane linker phycobiliprotein ApcE [Synechococcus sp. PCC 7002]	gi|170078613	99 kDa	141.86	119.84	107.98	102.62	120.8	116.2
8	chaperonin GroEL [Synechococcus sp. PCC 7002]	gi|170079053	58 kDa	152.09	158.19	164.9	138.15	164.56	165.32
9	DNA-directed RNA polymerase subunit beta' [Synechococcus sp. PCC 7002]	gi|170078647	145 kDa	159.41	139.81	88.73	117.1	134.12	114.31
10	S-layer protein [Synechococcus sp. PCC 7002]	gi|170079399	60 kDa	274.94	182.16	145.65	223.67	141.73	237.12
11	elongation factor G [Synechococcus sp. PCC 7002]	gi|170076969	77 kDa	118.46	139.81	97.101	106.57	115.09	101.08
12	ribulose bisophosphate carboxylase [Synechococcus sp. PCC 7002]	gi|170078404	52 kDa	131.62	111.05	102.96	121.04	117.95	109.58
13	allophycocyanin subunit beta [Synechococcus sp. PCC 7002]	gi|170078239	19 kDa	61.423	57.523	87.056	88.151	61.828	74.63
14	methyl-accepting chemotaxis protein [Synechococcus sp. PCC 7002]	gi|170076683	166 kDa	122.85	99.068	53.573	98.677	114.14	87.856
15	chaperonin GroEL-II (Cpn 60) [Synechococcus sp. PCC 7002]	gi|170076779	58 kDa	141.86	142.21	110.49	163.15	133.17	147.37
16	hypothetical protein SYNPCC7002_A1034 [Synechococcus sp. PCC 7002]	gi|170077654	66 kDa	212.05	135.02	109.66	124.99	75.144	103.92
17	molecular chaperone DnaK [Synechococcus sp. PCC 7002]	gi|170079013	69 kDa	128.69	119.84	105.47	94.73	103.68	96.358
18	catalase/peroxidase HPI [Synechococcus sp. PCC 7002]	gi|170079017	81 kDa	51.185	56.724	51.062	46.049	66.584	49.124
19	DNA-directed RNA polymerase subunit beta [Synechococcus sp. PCC 7002]	gi|170078649	123 kDa	95.059	76.698	41.854	55.259	71.34	64.239
20	ferredoxin-NADP reductase [Synechococcus sp. PCC 7002]	gi|170077475	45 kDa	95.059	99.068	78.685	134.2	103.68	99.192
21	phycocyanin-associated rod linker protein [Synechococcus sp. PCC 7002]	gi|170078809	32 kDa	106.76	72.703	71.152	148.67	93.217	109.58
22	fructose 1,6-bisphosphatase II [Synechococcus sp. PCC 7002]	gi|170077916	37 kDa	105.3	81.491	93.753	123.67	97.973	87.856
23	endopeptidase Clp, ATP-binding subunit C [Synechococcus sp. PCC 7002]	gi|170076773	91 kDa	102.37	83.089	62.781	81.573	79.9	76.52
24	carbon dioxide concentrating mechanism protein [Synechococcus sp. PCC 7002]	gi|2331050	12 kDa	108.22	85.486	123.89	198.67	105.58	121.86
25	bifunctional aconitate hydratase 2/2-methylisocitrate dehydratase [Synechococcus sp. PCC 7002]	gi|170078290	93 kDa	54.11	73.502	62.781	72.363	87.51	68.018
26	preprotein translocase subunit SecA [Synechococcus sp. PCC 7002]	gi|170077875	107 kDa	48.261	72.703	37.669	34.208	61.828	52.903
27	endopeptidase Clp ATP-binding subunit B [Synechococcus sp. PCC 7002]	gi|170077059	110 kDa	45.336	43.142	45.202	27.63	53.267	43.456
28	transketolase [Synechococcus sp. PCC 7002]	gi|170077643	72 kDa	68.735	90.28	94.59	78.941	82.754	78.409
29	magnesium chelatase subunit H [Synechococcus sp. PCC 7002]	gi|170077639	149 kDa	23.399	43.941	15.067	14.473	56.121	39.677
30	ferredoxin-dependent glutamate synthase 2 [Synechococcus sp. PCC 7002]	gi|170078988	169 kDa	39.486	47.936	20.09	21.051	45.657	33.064
31	lipoprotein [Synechococcus sp. PCC 7002]	gi|170079172	95 kDa	102.37	81.491	95.427	106.57	69.437	84.077
32	phosphoglycerate kinase [Synechococcus sp. PCC 7002]	gi|170078194	42 kDa	65.81	86.285	96.264	74.994	81.803	83.133
33	glutamine synthetase [Synechococcus sp. PCC 7002]	gi|170076875	79 kDa	80.434	93.475	67.803	57.89	79.9	63.294
34	elongation factor Ts [Synechococcus sp. PCC 7002]	gi|170078563	24 kDa	62.885	65.513	64.455	76.31	75.144	72.741
35	polynucleotide phosphorylase/polyadenylase [Synechococcus sp. PCC 7002]	gi|170077686	77 kDa	81.897	79.095	49.388	40.786	75.144	69.907
36	F0F1 ATP synthase subunit alpha [Synechococcus sp. PCC 7002]	gi|170077357	54 kDa	95.059	78.296	67.803	92.098	83.705	77.464
37	phosphoribulokinase [Synechococcus sp. PCC 7002]	gi|170079259	38 kDa	59.96	67.909	71.152	80.257	77.047	75.575
38	AhpC/TSA family protein [Synechococcus sp. PCC 7002]	gi|170077415	21 kDa	48.261	55.925	88.73	56.575	64.681	61.405
39	glyceraldehyde-3-phosphate dehydrogenase, type I [Synechococcus sp. PCC 7002]	gi|170076739	37 kDa	55.573	62.317	79.523	163.15	65.633	75.575
40	phycobilisome rod-core linker polypeptide cpcG (L-RC 28.5) [Synechococcus sp. PCC 7002]	gi|170077433	29 kDa	96.521	72.703	70.315	90.783	81.803	78.409
41	glycogen phosphorylase [Synechococcus sp. PCC 7002]	gi|170077107	96 kDa	51.185	75.899	56.921	21.051	61.828	51.013
42	OMP85 family outer membrane protein [Synechococcus sp. PCC 7002]	gi|170076946	78 kDa	59.96	51.132	77.011	114.47	68.486	67.073
43	carbamoyl phosphate synthase large subunit [Synechococcus sp. PCC 7002]	gi|170079083	120 kDa	23.399	46.338	21.764	11.841	37.097	19.838
44	phosphoribulokinase [Synechococcus sp. PCC 7002]	gi|170079442	34 kDa	86.284	57.523	37.669	64.469	55.169	90.69
45	translation initiation factor IF-2 [Synechococcus sp. PCC 7002]	gi|170077378	106 kDa	77.509	54.328	15.067	36.839	73.242	57.626
46	putative sulfite reductase [Synechococcus sp. PCC 7002]	gi|170079223	87 kDa	52.648	36.751	28.461	67.1	61.828	51.958
47	outer membrane TonB-dependent hemoglobin/transferrin/lactoferrin receptor family protein [Synechococcus sp. PCC 7002]	gi|170076551	95 kDa	114.07	79.095	143.14	0	1.9024	4.7234
48	glutamate-1-semialdehyde-2,1-aminomutase [Synechococcus sp. PCC 7002]	gi|170078804	46 kDa	48.261	55.925	62.781	60.522	67.535	55.737
49	Thf1-like protein [Synechococcus sp. PCC 7002]	gi|170077355	29 kDa	51.185	40.746	46.876	38.155	41.853	50.069
50	carotenoid binding protein [Synechococcus sp. PCC 7002]	gi|170079396	35 kDa	67.272	59.92	74.5	92.098	65.633	60.46
51	TonB-dependent siderophore receptor [Synechococcus sp. PCC 7002]	gi|170076608	88 kDa	100.91	96.671	142.3	7.8941	4.756	10.392
52	cell division protein ftsH like protein (ATP-dependent zinc metallopeptidase) [Synechococcus sp. PCC 7002]	gi|170077524	68 kDa	55.573	46.338	33.483	27.63	36.145	34.953
53	photosystem I subunit II [Synechococcus sp. PCC 7002]	gi|170077305	16 kDa	62.885	62.317	74.5	81.573	77.998	95.414
54	threonyl-tRNA synthetase [Synechococcus sp. PCC 7002]	gi|170077251	69 kDa	45.336	31.158	18.416	14.473	31.389	34.953
55	general secretion pathway protein D [Synechococcus sp. PCC 7002]	gi|170077129	84 kDa	74.585	56.724	87.056	86.836	55.169	64.239
56	ribulose bisphosphate carboxylase, small subunit [Synechococcus sp. PCC 7002]	gi|170078402	13 kDa	76.047	64.714	63.618	86.836	76.096	93.524
57	glucose-1-phosphate adenylyltransferase [Synechococcus sp. PCC 7002]	gi|170076729	48 kDa	62.885	65.513	51.062	56.575	68.486	61.405
58	inosine 5-monophosphate dehydrogenase [Synechococcus sp. PCC 7002]	gi|170076894	40 kDa	87.747	80.692	61.107	80.257	87.51	76.52
59	30S ribosomal protein S7 [Synechococcus sp. PCC 7002]	gi|170078667	18 kDa	67.272	45.539	47.714	88.151	59.925	71.796
60	elongation factor G [Synechococcus sp. PCC 7002]	gi|170078666	76 kDa	21.937	29.561	30.135	30.261	32.341	25.507
61	M3 family peptidase [Synechococcus sp. PCC 7002]	gi|170077062	78 kDa	48.261	57.523	56.084	18.42	42.804	32.119
62	DNA gyrase subunit B [Synechococcus sp. PCC 7002]	gi|170077957	71 kDa	38.023	47.137	22.601	38.155	37.097	31.175
63	magnesium chelatase subunit H [Synechococcus sp. PCC 7002]	gi|170077639-DECOY	?	1.4624	1.5979	0.83708	0	0	0.94469
64	universal stress protein [Synechococcus sp. PCC 7002]	gi|170078748	31 kDa	64.347	55.925	62.781	77.626	67.535	60.46
65	carbon dioxide concentrating mechanism protein [Synechococcus sp. PCC 7002]	gi|170078409	11 kDa	118.46	88.682	128.91	174.99	111.29	124.7
66	acetyl-CoA synthetase [Synechococcus sp. PCC 7002]	gi|170078444	73 kDa	40.948	31.957	30.135	40.786	36.145	34.953
67	phosphoglucomutase/phosphomannomutase [Synechococcus sp. PCC 7002]	gi|170076797	51 kDa	42.411	55.126	67.803	55.259	65.633	54.792
68	Type I restriction modification system, N-6 DNA methylase [Synechococcus sp. PCC 7002]	gi|170079642	136 kDa	0	1.5979	1.6742	0	0.9512	0
69	hypothetical protein SYNPCC7002_A1951 [Synechococcus sp. PCC 7002]	gi|170078556	32 kDa	61.423	50.333	76.174	74.994	51.365	55.737
70	L,L-diaminopimelate aminotransferase [Synechococcus sp. PCC 7002]	gi|170077820	45 kDa	40.948	43.941	54.41	49.996	50.413	47.234
71	fructose-1,6-bisphosphate aldolase [Synechococcus sp. PCC 7002]	gi|170077966	39 kDa	48.261	69.507	60.27	60.522	61.828	53.847
72	ATP-dependent metalloprotease FtsH [Synechococcus sp. PCC 7002]	gi|170076675	68 kDa	43.873	47.137	30.135	34.208	35.194	37.788
73	DNA-directed RNA polymerase subunit beta' [Synechococcus sp. PCC 7002]	gi|170078647-DECOY	?	0	0	0	0	1.9024	0
74	valyl-tRNA synthetase [Synechococcus sp. PCC 7002]	gi|170077832	103 kDa	26.324	33.555	24.275	26.314	32.341	24.562
75	ATP-dependent metalloprotease FtsH [Synechococcus sp. PCC 7002]	gi|170076977	69 kDa	57.035	43.941	28.461	31.577	44.706	45.345
76	DNA gyrase subunit A [Synechococcus sp. PCC 7002]	gi|170077448	93 kDa	39.486	31.957	16.742	31.577	34.243	32.119
77	carbon dioxide concentrating mechanism protein [Synechococcus sp. PCC 7002]	gi|170078406	70 kDa	65.81	60.719	40.18	69.732	62.779	61.405
78	hypothetical protein SYNPCC7002_A2696 [Synechococcus sp. PCC 7002]	gi|170079289	37 kDa	43.873	46.338	34.32	31.577	38.048	34.009
79	alpha,alpha-trehalose-phosphate-synthase [Synechococcus sp. PCC 7002]	gi|3152388	57 kDa	29.249	39.947	23.438	28.945	42.804	33.064
80	porphobilinogen deaminase [Synechococcus sp. PCC 7002]	gi|170078218	35 kDa	43.873	52.73	76.174	59.206	61.828	58.571
81	photosystem II 44 kDa subunit reaction center protein [Synechococcus sp. PCC 7002]	gi|170078168	52 kDa	68.735	55.925	26.787	52.628	54.218	43.456
82	50S ribosomal protein L11 [Synechococcus sp. PCC 7002]	gi|170077650	15 kDa	70.197	55.126	54.41	99.993	63.73	64.239
83	isocitrate dehydrogenase [Synechococcus sp. PCC 7002]	gi|170077460	82 kDa	23.399	43.142	46.039	31.577	45.657	52.903
84	allophycocyanin subunit alpha [Synechococcus sp. PCC 7002]	gi|170078738	18 kDa	52.648	42.344	54.41	61.837	50.413	52.903
85	glucose-6-phosphate isomerase [Synechococcus sp. PCC 7002]	gi|170077585	57 kDa	49.723	46.338	56.084	55.259	43.755	46.29
86	thiamine biosynthesis protein ThiC [Synechococcus sp. PCC 7002]	gi|170077453	51 kDa	39.486	48.735	61.107	27.63	32.341	37.788
87	sulfate adenylyltransferase [Synechococcus sp. PCC 7002]	gi|170077958	44 kDa	39.486	46.338	41.854	43.418	44.706	42.511
88	30S ribosomal protein S1 [Synechococcus sp. PCC 7002]	gi|170077576	37 kDa	46.798	44.74	40.18	60.522	58.023	58.571
89	5-methyltetrahydrofolate--homocysteine methyltransferase [Synechococcus sp. PCC 7002]	gi|170079061	131 kDa	13.162	17.577	15.067	2.6314	23.78	11.336
90	photosystem II protein [Synechococcus sp. PCC 7002]	gi|170078366	56 kDa	83.359	55.925	30.972	61.837	63.73	67.073
91	isoleucyl-tRNA synthetase [Synechococcus sp. PCC 7002]	gi|170078363	109 kDa	29.249	22.37	14.23	21.051	20.926	18.894
92	cysteine synthase [Synechococcus sp. PCC 7002]	gi|170077597	35 kDa	35.099	38.349	61.107	48.681	42.804	40.622
93	DNA-directed RNA polymerase subunit gamma [Synechococcus sp. PCC 7002]	gi|170078648	72 kDa	51.185	43.142	23.438	27.63	41.853	37.788
94	50S ribosomal protein L5 [Synechococcus sp. PCC 7002]	gi|170077673	20 kDa	42.411	28.762	38.506	49.996	33.292	42.511
95	cell division protein [Synechococcus sp. PCC 7002]	gi|170077793	70 kDa	33.636	24.767	15.067	18.42	25.682	17.949
96	molecular chaperone DnaK [Synechococcus sp. PCC 7002]	gi|170078758	84 kDa	27.786	26.365	14.23	21.051	30.438	24.562
97	rod shape-determining protein MreB [Synechococcus sp. PCC 7002]	gi|170078134	38 kDa	51.185	51.132	41.017	47.365	42.804	46.29
98	D-3-phosphoglycerate dehydrogenase [Synechococcus sp. PCC 7002]	gi|170077862	56 kDa	59.96	49.534	36.831	47.365	47.56	47.234
99	phosphoribosylformylglycinamidine synthase II [Synechococcus sp. PCC 7002]	gi|170078274	81 kDa	30.711	48.735	35.157	36.839	47.56	40.622
100	isopropylmalate isomerase large subunit [Synechococcus sp. PCC 7002]	gi|170077967	51 kDa	23.399	31.957	30.972	15.788	34.243	37.788
101	pyruvate dehydrogenase E1 component subunit alpha [Synechococcus sp. PCC 7002]	gi|170076981	38 kDa	19.012	27.164	20.927	19.735	23.78	27.396
102	hypothetical protein SYNPCC7002_A2695 [Synechococcus sp. PCC 7002]	gi|170079288	21 kDa	14.624	19.174	26.787	19.735	15.219	22.673
103	protochlorophyllide oxidoreductase [Synechococcus sp. PCC 7002]	gi|170076841	35 kDa	39.486	43.941	42.691	69.732	39.95	43.456
104	F0F1 ATP synthase subunit gamma [Synechococcus sp. PCC 7002]	gi|170077356	35 kDa	54.11	45.539	27.624	48.681	42.804	51.958
105	signal recognition particle protein [Synechococcus sp. PCC 7002]	gi|170078230	52 kDa	17.549	23.968	22.601	18.42	23.78	32.119
106	S-layer protein [Synechococcus sp. PCC 7002]	gi|170077795	47 kDa	29.249	27.164	41.017	80.257	61.828	44.4
107	NAD(P)H-quinone oxidoreductase subunit H [Synechococcus sp. PCC 7002]	gi|170079135	46 kDa	38.023	30.36	15.067	30.261	28.536	28.341
108	alanine:glyoxylate aminotransferase [Synechococcus sp. PCC 7002]	gi|170076809	42 kDa	26.324	34.354	30.972	31.577	44.706	46.29
109	photosystem II manganese stabilizing protein PsbO [Synechococcus sp. PCC 7002]	gi|170076897	30 kDa	49.723	38.349	47.714	71.047	52.316	51.958
110	hypothetical protein SYNPCC7002_A0913 [Synechococcus sp. PCC 7002]	gi|170077535	13 kDa	27.786	31.158	40.18	63.153	39.95	47.234
111	heat shock protein 90 [Synechococcus sp. PCC 7002]	gi|170078507	75 kDa	27.786	27.963	20.927	11.841	20.926	16.06
112	trigger factor [Synechococcus sp. PCC 7002]	gi|170077891	51 kDa	26.324	36.751	46.039	46.049	42.804	51.958
113	4-hydroxy-3-methylbut-2-en-1-yl diphosphate synthase [Synechococcus sp. PCC 7002]	gi|170077366	44 kDa	32.174	31.957	26.787	24.998	36.145	33.064
114	insulinase [Synechococcus sp. PCC 7002]	gi|170079171	56 kDa	27.786	32.756	47.714	36.839	36.145	31.175
115	hypothetical protein SYNPCC7002_A2849 [Synechococcus sp. PCC 7002]	gi|170079434	97 kDa	23.399	16.778	10.882	17.104	26.633	12.281
116	L-asparaginase II (thermolabile) [Synechococcus sp. PCC 7002]	gi|170077710	34 kDa	39.486	38.349	32.646	30.261	40.901	32.119
117	cytochrome c-550 [Synechococcus sp. PCC 7002]	gi|170076745	19 kDa	35.099	47.137	51.062	71.047	56.121	61.405
118	50S ribosomal protein L1 [Synechococcus sp. PCC 7002]	gi|170077649	26 kDa	38.023	32.756	25.112	39.471	37.097	44.4
119	delta-aminolevulinic acid dehydratase [Synechococcus sp. PCC 7002]	gi|170078360	36 kDa	23.399	35.952	32.646	32.892	36.145	34.953
120	N-acetylmuramoyl-L-alanine amidase [Synechococcus sp. PCC 7002]	gi|170077203	67 kDa	59.96	31.957	44.365	57.89	46.609	42.511
121	surface layer protein-like protein [Synechococcus sp. PCC 7002]	gi|170079199	45 kDa	43.873	37.55	53.573	71.047	63.73	58.571
122	photosystem I reaction center subunit III, PsaF [Synechococcus sp. PCC 7002]	gi|170077629	18 kDa	55.573	40.746	35.994	88.151	58.023	55.737
123	pyruvate:ferredoxin (flavodoxin) oxidoreductase [Synechococcus sp. PCC 7002]	gi|170078052	129 kDa	1.4624	0.79893	0	0	2.8536	1.8894
124	dihydrolipoamide dehydrogenase [Synechococcus sp. PCC 7002]	gi|170077744	51 kDa	23.399	37.55	34.32	31.577	37.097	33.064
125	coproporphyrinogen III oxidase [Synechococcus sp. PCC 7002]	gi|170078434	40 kDa	27.786	25.566	25.949	36.839	37.097	28.341
126	magnesium chelatase ATPase subunit I [Synechococcus sp. PCC 7002]	gi|170078852	40 kDa	21.937	33.555	26.787	24.998	35.194	34.009
127	aspartyl/glutamyl-tRNA amidotransferase subunit B [Synechococcus sp. PCC 7002]	gi|170079130	55 kDa	39.486	39.947	35.994	32.892	38.048	34.009
128	ABC transporter branched-chain amino acid transport periplasmic binding protein [Synechococcus sp. PCC 7002]	gi|170077026	48 kDa	42.411	45.539	30.972	52.628	51.365	46.29
129	hypothetical protein SYNPCC7002_A1253 [Synechococcus sp. PCC 7002]	gi|170077869	21 kDa	14.624	54.328	53.573	32.892	48.511	51.013
130	glycyl-tRNA synthetase subunit beta [Synechococcus sp. PCC 7002]	gi|170079051	78 kDa	29.249	26.365	18.416	21.051	26.633	27.396
131	IucA/IucC family siderophore biosynthesis protein [Synechococcus sp. PCC 7002]	gi|170076489	94 kDa	54.11	63.915	52.736	0	0	0
132	putative peptidyl-prolyl cis-trans isomerase [Synechococcus sp. PCC 7002]	gi|170078889	40 kDa	35.099	27.963	31.809	39.471	30.438	43.456
133	6-phosphogluconate dehydrogenase [Synechococcus sp. PCC 7002]	gi|170076852	52 kDa	33.636	37.55	46.876	24.998	32.341	30.23
134	carboxyl-terminal protease [Synechococcus sp. PCC 7002]	gi|170076844	48 kDa	39.486	37.55	60.27	36.839	26.633	37.788
135	30S ribosomal protein S2 [Synechococcus sp. PCC 7002]	gi|170078564	29 kDa	58.498	39.947	30.135	61.837	42.804	39.677
136	hypothetical protein SYNPCC7002_A0363 [Synechococcus sp. PCC 7002]	gi|170076991	43 kDa	40.948	44.74	35.157	39.471	46.609	40.622
137	3-isopropylmalate dehydrogenase [Synechococcus sp. PCC 7002]	gi|170078949	39 kDa	27.786	25.566	31.809	42.102	34.243	30.23
138	uroporphyrinogen decarboxylase [Synechococcus sp. PCC 7002]	gi|170077445	39 kDa	26.324	28.762	28.461	36.839	32.341	34.953
139	alpha-glucan phosphorylase [Synechococcus sp. PCC 7002]	gi|170078737	98 kDa	2.9249	9.5872	5.8596	1.3157	10.463	9.4469
140	phosphoenolpyruvate synthase [Synechococcus sp. PCC 7002]	gi|170076879	91 kDa	10.237	15.979	12.556	3.9471	22.829	11.336
141	bifunctional phosphoribosylaminoimidazolecarboxamide formyltransferase/IMP cyclohydrolase [Synechococcus sp. PCC 7002]	gi|170078298	55 kDa	27.786	35.952	24.275	27.63	38.999	35.898
142	geranylgeranyl reductase [Synechococcus sp. PCC 7002]	gi|170079071	45 kDa	13.162	15.979	8.3708	21.051	27.585	24.562
143	ketol-acid reductoisomerase [Synechococcus sp. PCC 7002]	gi|170077893	36 kDa	46.798	34.354	25.112	67.1	38.048	43.456
144	ribonuclease E [Synechococcus sp. PCC 7002]	gi|170077410	77 kDa	16.087	14.381	7.5337	13.157	19.024	22.673
145	endopeptidase Clp ATP-binding subunit B1 [Synechococcus sp. PCC 7002]	gi|170078948	98 kDa	45.336	33.555	21.764	6.5785	18.073	19.838
146	alanyl-tRNA synthetase [Synechococcus sp. PCC 7002]	gi|170078279	97 kDa	23.399	17.577	13.393	13.157	16.17	11.336
147	glycosyl hydrolase family protein [Synechococcus sp. PCC 7002]	gi|170079405	62 kDa	11.7	15.979	5.0225	6.5785	10.463	9.4469
148	phosphoenolpyruvate carboxylase [Synechococcus sp. PCC 7002]	gi|170078023	114 kDa	23.399	19.174	6.6966	13.157	19.024	14.17
149	pyruvate kinase [Synechococcus sp. PCC 7002]	gi|170078266	64 kDa	33.636	35.952	16.742	21.051	36.145	34.009
150	aspartyl-tRNA synthetase [Synechococcus sp. PCC 7002]	gi|170077050	67 kDa	19.012	24.767	10.045	11.841	28.536	21.728
151	ATP-dependent Clp protease-like protein [Synechococcus sp. PCC 7002]	gi|170077810	25 kDa	33.636	31.158	37.669	68.416	33.292	30.23
152	phenylalanyl-tRNA synthetase subunit beta [Synechococcus sp. PCC 7002]	gi|170077073	89 kDa	40.948	35.952	13.393	15.788	24.731	18.894
153	M16 family proteinase [Synechococcus sp. PCC 7002]	gi|170077103	54 kDa	35.099	28.762	49.388	43.418	32.341	35.898
154	adenylosuccinate synthetase [Synechococcus sp. PCC 7002]	gi|170077504	48 kDa	29.249	31.158	33.483	30.261	37.097	34.009
155	bifunctional 3,4-dihydroxy-2-butanone 4-phosphate synthase/GTP cyclohydrolase II/unknown domain fusion protein [Synechococcus sp. PCC 7002]	gi|170077055	62 kDa	20.474	17.577	12.556	2.6314	16.17	6.6128
156	phycocyanin-associated, rod-terminating linker protein CpcD [Synechococcus sp. PCC 7002]	gi|170078810	9 kDa	42.411	31.158	38.506	86.836	36.145	45.345
157	polyketide synthase [Synechococcus sp. PCC 7002]	gi|170077790	299 kDa	5.8498	6.3915	1.6742	0	7.6096	0.94469
158	transaldolase [Synechococcus sp. PCC 7002]	gi|170078069	41 kDa	33.636	39.148	63.618	30.261	33.292	31.175
159	twitching motility protein [Synechococcus sp. PCC 7002]	gi|170077828	50 kDa	20.474	27.164	13.393	6.5785	19.024	22.673
160	Outer membrane efflux protein [Synechococcus sp. PCC 7002]	gi|170077210	64 kDa	43.873	35.952	49.388	49.996	37.097	35.898
161	RNA polymerase sigma factor [Synechococcus sp. PCC 7002]	gi|170078618	44 kDa	10.237	7.9893	5.8596	15.788	8.5608	19.838
162	Nudix hydrolase family protein [Synechococcus sp. PCC 7002]	gi|170078978	27 kDa	36.561	27.963	28.461	31.577	29.487	25.507
163	two-component hybrid sensor and regulator [Synechococcus sp. PCC 7002]	gi|170077877-DECOY	?	0	0	1.6742	0	0	0
164	Mn-superoxide dismutase [Synechococcus sp. PCC 7002]	gi|170076871	22 kDa	20.474	23.968	23.438	42.102	43.755	52.903
165	50S ribosomal protein L10 [Synechococcus sp. PCC 7002]	gi|170077648	19 kDa	43.873	39.947	41.017	49.996	40.901	42.511
166	GMP synthase [Synechococcus sp. PCC 7002]	gi|170077976	61 kDa	36.561	42.344	30.135	22.367	29.487	24.562
167	hypothetical protein SYNPCC7002_A2573 [Synechococcus sp. PCC 7002]	gi|170079167	224 kDa	0	0.79893	2.5112	0	0.9512	0.94469
168	hypothetical protein SYNPCC7002_A1858 [Synechococcus sp. PCC 7002]	gi|170078464	24 kDa	38.023	45.539	71.152	15.788	22.829	21.728
169	transcription-repair coupling factor [Synechococcus sp. PCC 7002]	gi|170077902	131 kDa	8.7747	7.9893	5.0225	0	4.756	3.7788
170	prolyl-tRNA synthetase [Synechococcus sp. PCC 7002]	gi|170078264	67 kDa	11.7	20.772	13.393	6.5785	21.878	18.894
171	adenylosuccinate lyase [Synechococcus sp. PCC 7002]	gi|170079247	49 kDa	33.636	24.767	16.742	19.735	27.585	20.783
172	hypothetical protein SYNPCC7002_A1273 [Synechococcus sp. PCC 7002]	gi|170077888	68 kDa	40.948	27.164	11.719	10.526	24.731	20.783
173	hypothetical protein SYNPCC7002_A2178 [Synechococcus sp. PCC 7002]	gi|170078776	102 kDa	32.174	21.571	41.017	42.102	30.438	34.953
174	DNA topoisomerase I [Synechococcus sp. PCC 7002]	gi|170079140	98 kDa	17.549	13.582	5.8596	5.2628	14.268	10.392
175	recombinase A [Synechococcus sp. PCC 7002]	gi|170077054	37 kDa	32.174	36.751	28.461	26.314	33.292	25.507
176	ATP-dependent DNA helicase II PcrA [Synechococcus sp. PCC 7002]	gi|170077156	90 kDa	4.3873	3.9947	0	2.6314	4.756	3.7788
177	bifunctional aconitate hydratase 2/2-methylisocitrate dehydratase [Synechococcus sp. PCC 7002]	gi|170078290-DECOY	?	0	0	1.6742	0	0	1.8894
178	NAD dependent epimerase/dehydratase family protein [Synechococcus sp. PCC 7002]	gi|170077469	45 kDa	43.873	43.941	28.461	38.155	36.145	39.677
179	exoribonuclease [Synechococcus sp. PCC 7002]	gi|170078152	86 kDa	29.249	27.963	15.067	18.42	29.487	20.783
180	DEAD/DEAH box helicase [Synechococcus sp. PCC 7002]	gi|170078848	109 kDa	11.7	7.9893	4.1854	3.9471	9.512	5.6681
181	type IV pilus assembly protein PilM [Synechococcus sp. PCC 7002]	gi|170077126	41 kDa	43.873	32.756	27.624	22.367	27.585	29.285
182	hypothetical protein SYNPCC7002_A2217 [Synechococcus sp. PCC 7002]	gi|170078815	35 kDa	14.624	33.555	46.876	18.42	29.487	30.23
183	30S ribosomal protein S13 [Synechococcus sp. PCC 7002]	gi|170077664	14 kDa	43.873	26.365	56.084	65.785	33.292	41.566
184	GTP-binding protein LepA [Synechococcus sp. PCC 7002]	gi|170079016	67 kDa	2.9249	10.386	5.0225	3.9471	5.7072	2.8341
185	heme oxygenase (decyclizing) [Synechococcus sp. PCC 7002]	gi|170079103	27 kDa	5.8498	17.577	24.275	28.945	28.536	33.064
186	two-component hybrid sensor and regulator [Synechococcus sp. PCC 7002]	gi|170076684	114 kDa	21.937	26.365	9.2079	11.841	23.78	17.949
187	ferrichrome-iron receptor; TonB-dependent siderophore receptor [Synechococcus sp. PCC 7002]	gi|170076573	91 kDa	30.711	35.952	55.247	0	0	0
188	GTP-binding protein [Synechococcus sp. PCC 7002]	gi|170077331	66 kDa	13.162	23.169	14.23	13.157	20.926	19.838
189	leucyl-tRNA synthetase [Synechococcus sp. PCC 7002]	gi|170078301	96 kDa	5.8498	11.984	6.6966	2.6314	12.366	11.336
190	thioredoxin [Synechococcus sp. PCC 7002]	gi|170078222	12 kDa	49.723	31.158	44.365	47.365	35.194	36.843
191	magnesium-protoporphyrin IX monomethyl ester cyclase [Synechococcus sp. PCC 7002]	gi|170077330	42 kDa	13.162	11.984	4.1854	11.841	23.78	18.894
192	hypothetical protein SYNPCC7002_F0048 [Synechococcus sp. PCC 7002]	gi|170079601	112 kDa	1.4624	4.7936	0	0	2.8536	2.8341
193	peptide chain release factor 1 [Synechococcus sp. PCC 7002]	gi|170077656	41 kDa	13.162	16.778	20.927	18.42	13.317	17.004
194	DNA-directed RNA polymerase subunit alpha [Synechococcus sp. PCC 7002]	gi|170077662	35 kDa	42.411	27.164	25.112	47.365	31.389	33.064
195	serine/threonine kinase [Synechococcus sp. PCC 7002]	gi|170077072	62 kDa	2.9249	2.3968	0.83708	0	0.9512	1.8894
196	flavoprotein [Synechococcus sp. PCC 7002]	gi|170077936	64 kDa	14.624	20.772	11.719	5.2628	13.317	11.336
197	GTP pyrophosphokinase [Synechococcus sp. PCC 7002]	gi|170079402	87 kDa	5.8498	6.3915	0.83708	1.3157	1.9024	1.8894
198	dihydrodipicolinate synthase [Synechococcus sp. PCC 7002]	gi|170077889	32 kDa	20.474	26.365	32.646	26.314	30.438	22.673
199	hypothetical protein SYNPCC7002_A1122 [Synechococcus sp. PCC 7002]	gi|170077740	32 kDa	19.012	20.772	20.09	6.5785	24.731	24.562
200	two-component DNA binding response regulator [Synechococcus sp. PCC 7002]	gi|170077600	27 kDa	51.185	35.153	40.18	59.206	38.999	42.511
201	ATPase like protein [Synechococcus sp. PCC 7002]	gi|170079165	66 kDa	20.474	16.778	10.045	7.8941	14.268	13.226
202	hypothetical protein SYNPCC7002_A0041 [Synechococcus sp. PCC 7002]	gi|170076676	207 kDa	8.7747	16.778	18.416	10.526	13.317	17.004
203	FHA domain-containing protein [Synechococcus sp. PCC 7002]	gi|170077636	47 kDa	32.174	28.762	48.551	30.261	35.194	27.396
204	nitrogen regulatory protein P-II [Synechococcus sp. PCC 7002]	gi|170077900	12 kDa	36.561	27.963	44.365	30.261	25.682	25.507
205	GTP-binding protein [Synechococcus sp. PCC 7002]	gi|170078335	40 kDa	21.937	24.767	25.949	32.892	34.243	31.175
206	RecF/RecN/SMC domain-containing protein [Synechococcus sp. PCC 7002]	gi|170079221	116 kDa	0	2.3968	0	1.3157	0	0
207	hypothetical protein SYNPCC7002_A2174 [Synechococcus sp. PCC 7002]	gi|170078772	178 kDa	2.9249	0.79893	0	1.3157	0.9512	1.8894
208	glycine cleavage system aminomethyltransferase T [Synechococcus sp. PCC 7002]	gi|170078310	40 kDa	13.162	17.577	24.275	17.104	20.926	18.894
209	L-asparagine amidohydrolase [Synechococcus sp. PCC 7002]	gi|170077446	32 kDa	23.399	18.375	27.624	24.998	12.366	20.783
210	heat shock protein [Synechococcus sp. PCC 7002]	gi|170077318	27 kDa	24.862	24.767	18.416	10.526	42.804	26.451
211	hypothetical protein SYNPCC7002_A2862 [Synechococcus sp. PCC 7002]	gi|170079447	90 kDa	8.7747	3.1957	4.1854	9.2098	10.463	4.7234
212	general secretion pathway protein E [Synechococcus sp. PCC 7002]	gi|170077319	75 kDa	16.087	15.18	8.3708	1.3157	6.6584	9.4469
213	30S ribosomal protein S5 [Synechococcus sp. PCC 7002]	gi|170077669	18 kDa	26.324	21.571	15.067	142.09	26.633	19.838
214	glycine dehydrogenase [Synechococcus sp. PCC 7002]	gi|170078158	108 kDa	7.3122	13.582	4.1854	1.3157	9.512	2.8341
215	DNA polymerase I [Synechococcus sp. PCC 7002]	gi|170077895	109 kDa	4.3873	6.3915	0	1.3157	3.8048	0.94469
216	type I site-specific restriction-modification system, R (restriction) subunit [Synechococcus sp. PCC 7002]	gi|170079470	88 kDa	5.8498	7.9893	5.8596	1.3157	8.5608	3.7788
217	aminopeptidase [Synechococcus sp. PCC 7002]	gi|170077063	96 kDa	14.624	19.174	7.5337	6.5785	12.366	10.392
218	hypothetical protein SYNPCC7002_A1605 [Synechococcus sp. PCC 7002]	gi|170078213	17 kDa	36.561	31.957	36.831	53.943	34.243	44.4
219	two-component hybrid sensor kinase/response regulator [Synechococcus sp. PCC 7002]	gi|170079099	162 kDa	4.3873	3.9947	1.6742	3.9471	1.9024	2.8341
220	DNA methylase containing a Zn-ribbon module [Synechococcus sp. PCC 7002]	gi|170079575	118 kDa	0	6.3915	0	0	1.9024	0
221	glucose-6-phosphate 1-dehydrogenase [Synechococcus sp. PCC 7002]	gi|170078068	58 kDa	32.174	26.365	6.6966	6.5785	16.17	10.392
222	hypothetical protein SYNPCC7002_A2116 [Synechococcus sp. PCC 7002]	gi|170078715	103 kDa	13.162	13.582	27.624	9.2098	9.512	11.336
223	two-component hybrid sensor and regulator [Synechococcus sp. PCC 7002]	gi|170078247	117 kDa	2.9249	1.5979	1.6742	0	0.9512	0.94469
224	amino acid ABC transporter substrate-binding protein [Synechococcus sp. PCC 7002]	gi|170078799	45 kDa	45.336	39.947	44.365	46.049	40.901	39.677
225	iron transport protein [Synechococcus sp. PCC 7002]	gi|170079102	39 kDa	68.735	53.529	57.758	26.314	25.682	19.838
226	circadian clock protein KaiC [Synechococcus sp. PCC 7002]	gi|170076915	57 kDa	24.862	21.571	14.23	5.2628	18.073	15.115
227	dihydroxy-acid dehydratase [Synechococcus sp. PCC 7002]	gi|170077275	59 kDa	30.711	26.365	31.809	24.998	31.389	31.175
228	thymidylate synthase [Synechococcus sp. PCC 7002]	gi|170077924	79 kDa	2.9249	1.5979	0.83708	1.3157	0.9512	3.7788
229	VIPP1 protein [Synechococcus sp. PCC 7002]	gi|170076922	29 kDa	26.324	28.762	31.809	28.945	25.682	35.898
230	hypothetical protein SYNPCC7002_A2843 [Synechococcus sp. PCC 7002]	gi|170079428	89 kDa	0	1.5979	0.83708	0	1.9024	0
231	serine hydroxymethyltransferase [Synechococcus sp. PCC 7002]	gi|170079025	46 kDa	17.549	23.968	20.09	22.367	26.633	26.451
232	nicotinamide nucleotide transhydrogenase, chain alpha, part 1 [Synechococcus sp. PCC 7002]	gi|170077607	40 kDa	23.399	31.957	38.506	30.261	36.145	34.009
233	30S ribosomal protein S3 [Synechococcus sp. PCC 7002]	gi|170077679	27 kDa	38.023	34.354	28.461	39.471	35.194	34.953
234	photosystem I subunit VII [Synechococcus sp. PCC 7002]	gi|170078198	9 kDa	30.711	28.762	29.298	48.681	41.853	42.511
235	nitroreductase family protein [Synechococcus sp. PCC 7002]	gi|170078447	22 kDa	19.012	20.772	32.646	27.63	25.682	28.341
236	flavin reductase-like domain-containing protein [Synechococcus sp. PCC 7002]	gi|170078350	66 kDa	13.162	17.577	10.882	5.2628	15.219	7.5575
237	argininosuccinate synthase [Synechococcus sp. PCC 7002]	gi|170079392	44 kDa	23.399	31.158	15.067	13.157	29.487	20.783
238	ribonuclease II [Synechococcus sp. PCC 7002]	gi|170077199	76 kDa	4.3873	7.1904	0.83708	5.2628	4.756	6.6128
239	photosystem I P700 chlorophyll a apoprotein A2 [Synechococcus sp. PCC 7002]	gi|170078567	82 kDa	36.561	16.778	17.579	67.1	27.585	34.009
240	3-oxoacyl-(acyl-carrier-protein) reductase [Synechococcus sp. PCC 7002]	gi|170078962	27 kDa	30.711	26.365	26.787	32.892	32.341	29.285
241	ATP-dependent RNA helicase DeaD [Synechococcus sp. PCC 7002]	gi|170077242	54 kDa	17.549	17.577	6.6966	5.2628	15.219	16.06
242	1-deoxy-D-xylulose 5-phosphate reductoisomerase [Synechococcus sp. PCC 7002]	gi|170077440	43 kDa	19.012	19.174	20.09	23.682	19.024	23.617
243	DNA-binding protein HU [Synechococcus sp. PCC 7002]	gi|170078570	10 kDa	33.636	33.555	50.225	42.102	38.048	45.345
244	phosphoribosylglycinamide formyltransferase 2 [Synechococcus sp. PCC 7002]	gi|170078634	43 kDa	26.324	19.174	26.787	24.998	26.633	30.23
245	TldD/PmbA family protein [Synechococcus sp. PCC 7002]	gi|170078951	55 kDa	5.8498	2.3968	1.6742	0	1.9024	0.94469
246	hypothetical protein SYNPCC7002_A1011 [Synechococcus sp. PCC 7002]	gi|170077632	42 kDa	21.937	22.37	17.579	11.841	20.926	21.728
247	asparaginyl-tRNA synthetase [Synechococcus sp. PCC 7002]	gi|170079063	52 kDa	10.237	11.185	9.2079	3.9471	12.366	11.336
248	lysyl-tRNA synthetase [Synechococcus sp. PCC 7002]	gi|170076670	61 kDa	4.3873	10.386	8.3708	3.9471	9.512	13.226
249	arginyl-tRNA synthetase [Synechococcus sp. PCC 7002]	gi|170077224	65 kDa	10.237	11.185	6.6966	9.2098	13.317	13.226
250	glycogen synthase [Synechococcus sp. PCC 7002]	gi|170078141	55 kDa	7.3122	12.783	5.0225	1.3157	12.366	6.6128
251	hypothetical protein SYNPCC7002_A1969 [Synechococcus sp. PCC 7002]	gi|170078574	21 kDa	26.324	23.968	27.624	39.471	25.682	21.728
252	50S ribosomal protein L6 [Synechococcus sp. PCC 7002]	gi|170077671	19 kDa	29.249	31.158	41.017	39.471	38.999	38.732
253	glutamyl-tRNA synthetase [Synechococcus sp. PCC 7002]	gi|170078008	54 kDa	19.012	16.778	22.601	23.682	21.878	21.728
254	inorganic pyrophosphatase [Synechococcus sp. PCC 7002]	gi|170077844	19 kDa	17.549	29.561	35.994	26.314	28.536	33.064
255	30S ribosomal protein S4 [Synechococcus sp. PCC 7002]	gi|170078686	23 kDa	29.249	27.164	20.09	22.367	28.536	24.562
256	phycocyanobilin:ferredoxin oxidoreductase [Synechococcus sp. PCC 7002]	gi|170078825	28 kDa	20.474	19.973	28.461	42.102	26.633	28.341
257	hydrogenase small subunit [Synechococcus sp. PCC 7002]	gi|170077947	39 kDa	13.162	19.973	15.905	18.42	19.024	17.949
258	UDP-N-acetylmuramoylalanyl-D-glutamate--2,6-diaminopimelate ligase [Synechococcus sp. PCC 7002]	gi|170076754	54 kDa	13.162	21.571	31.809	13.157	25.682	19.838
259	translation initiation factor IF-2 [Synechococcus sp. PCC 7002]	gi|170077378-DECOY	?	2.9249	0	0	0	0	0
260	50S ribosomal protein L2 [Synechococcus sp. PCC 7002]	gi|170077682	31 kDa	32.174	21.571	19.253	28.945	29.487	27.396
261	bacterioferritin [Synechococcus sp. PCC 7002]	gi|170079258	18 kDa	30.711	43.941	18.416	28.945	19.024	36.843
262	hypothetical protein SYNPCC7002_F0044 [Synechococcus sp. PCC 7002]	gi|170079597	73 kDa	8.7747	7.1904	1.6742	2.6314	7.6096	3.7788
263	1-deoxy-D-xylulose-5-phosphate synthase [Synechococcus sp. PCC 7002]	gi|170077789	69 kDa	19.012	30.36	6.6966	7.8941	36.145	24.562
264	enoyl-(acyl carrier protein) reductase [Synechococcus sp. PCC 7002]	gi|170078283	27 kDa	30.711	28.762	35.157	44.734	34.243	34.953
265	chaperone protein dnaJ [Synechococcus sp. PCC 7002]	gi|170078759	36 kDa	2.9249	1.5979	2.5112	0	2.8536	0.94469
266	aspartyl/glutamyl-tRNA amidotransferase subunit A [Synechococcus sp. PCC 7002]	gi|170077646	52 kDa	30.711	28.762	26.787	36.839	34.243	28.341
267	Zn-dependent proteases like protein [Synechococcus sp. PCC 7002]	gi|170078622	50 kDa	19.012	22.37	20.927	10.526	22.829	18.894
268	hypothetical protein SYNPCC7002_A2773 [Synechococcus sp. PCC 7002]	gi|170079364	58 kDa	16.087	19.973	16.742	10.526	26.633	19.838
269	3-phosphoshikimate 1-carboxyvinyltransferase [Synechococcus sp. PCC 7002]	gi|170076801	47 kDa	17.549	15.979	10.882	17.104	15.219	16.06
270	3-octaprenyl-4-hydroxybenzoate carboxy-lyase [Synechococcus sp. PCC 7002]	gi|170077731	56 kDa	8.7747	6.3915	2.5112	1.3157	7.6096	3.7788
271	phosphate transporter ATP-binding protein [Synechococcus sp. PCC 7002]	gi|170078500	30 kDa	11.7	27.164	11.719	6.5785	24.731	20.783
272	S-adenosyl-L-homocysteine hydrolase [Synechococcus sp. PCC 7002]	gi|170078673	51 kDa	19.012	23.169	16.742	14.473	17.122	12.281
273	hypothetical protein SYNPCC7002_A0479 [Synechococcus sp. PCC 7002]	gi|170077105	23 kDa	23.399	19.174	31.809	22.367	25.682	28.341
274	two-component hybrid sensor kinase/response regulator [Synechococcus sp. PCC 7002]	gi|170077617	145 kDa	1.4624	1.5979	0	0	0	0
275	short chain dehydrogenase [Synechococcus sp. PCC 7002]	gi|170079184	72 kDa	16.087	21.571	5.8596	7.8941	19.024	11.336
276	ribosome recycling factor [Synechococcus sp. PCC 7002]	gi|170077573	21 kDa	20.474	19.973	23.438	30.261	22.829	18.894
277	F0F1 ATP synthase subunit delta [Synechococcus sp. PCC 7002]	gi|170077358	20 kDa	33.636	33.555	35.157	30.261	31.389	30.23
278	cytosol aminopeptidase [Synechococcus sp. PCC 7002]	gi|170079055	52 kDa	19.012	23.169	20.927	7.8941	19.024	18.894
279	30S ribosomal protein S11 [Synechococcus sp. PCC 7002]	gi|170077663	14 kDa	36.561	26.365	22.601	35.524	26.633	30.23
280	N-acetyl-gamma-glutamyl-phosphate reductase [Synechococcus sp. PCC 7002]	gi|170078703	38 kDa	20.474	23.968	25.112	21.051	26.633	20.783
281	photosystem II complex subunit [Synechococcus sp. PCC 7002]	gi|170077927	18 kDa	14.624	11.984	15.067	17.104	9.512	12.281
282	V4R domain-containing protein [Synechococcus sp. PCC 7002]	gi|170079267	27 kDa	19.012	11.984	14.23	23.682	19.024	13.226
283	DNA methylase containing a Zn-ribbon module [Synechococcus sp. PCC 7002]	gi|170079575-DECOY	?	0	0	1.6742	0	0	0
284	siderophore biosynthesis protein [Synechococcus sp. PCC 7002]	gi|170076493	70 kDa	30.711	36.751	25.112	0	0	0
285	50S ribosomal protein L25 [Synechococcus sp. PCC 7002]	gi|170077505	11 kDa	30.711	25.566	25.112	31.577	26.633	32.119
286	putative lipoprotein [Synechococcus sp. PCC 7002]	gi|170077796	23 kDa	17.549	52.73	23.438	14.473	26.633	26.451
287	phosphoglycerate mutase [Synechococcus sp. PCC 7002]	gi|170079154	49 kDa	5.8498	17.577	25.949	17.104	24.731	22.673
288	photosystem II D2 protein [Synechococcus sp. PCC 7002]	gi|170078797	40 kDa	43.873	23.968	16.742	42.102	34.243	27.396
289	50S ribosomal protein L18 [Synechococcus sp. PCC 7002]	gi|170077670	13 kDa	13.162	19.973	25.949	18.42	18.073	27.396
290	30S ribosomal protein S19 [Synechococcus sp. PCC 7002]	gi|170077681	10 kDa	21.937	32.756	36.831	35.524	41.853	42.511
291	ABC transporter ATPase [Synechococcus sp. PCC 7002]	gi|170077615	56 kDa	10.237	13.582	6.6966	6.5785	14.268	11.336
292	magnesium chelatase ATPase subunit D [Synechococcus sp. PCC 7002]	gi|170077221	75 kDa	17.549	22.37	9.2079	11.841	19.024	13.226
293	nucleoside diphosphate kinase [Synechococcus sp. PCC 7002]	gi|170077436	16 kDa	27.786	22.37	31.809	72.363	28.536	26.451
294	Chain B, Structural Insights Into Substrate And Cofactor Selelction By Sp2771	gi|523309408	49 kDa	7.3122	8.7883	10.045	1.3157	9.512	5.6681
295	ATP-dependent metalloprotease FtsH [Synechococcus sp. PCC 7002]	gi|170076675-DECOY	?	2.9249	0	0	0	0	0
296	AhpC/TSA family protein [Synechococcus sp. PCC 7002]	gi|170076948	23 kDa	13.162	24.767	31.809	22.367	21.878	19.838
297	trypsin-like serine protease [Synechococcus sp. PCC 7002]	gi|170078262	42 kDa	20.474	11.185	23.438	26.314	23.78	21.728
298	hypothetical protein SYNPCC7002_A2553 [Synechococcus sp. PCC 7002]	gi|170079147	33 kDa	38.023	24.767	39.343	44.734	26.633	30.23
299	3-oxoacyl-(acyl carrier protein) synthase II [Synechococcus sp. PCC 7002]	gi|170077644	44 kDa	7.3122	19.174	20.09	11.841	20.926	18.894
300	hypothetical protein SYNPCC7002_A0815 [Synechococcus sp. PCC 7002]	gi|170077437	22 kDa	32.174	22.37	30.135	36.839	24.731	28.341
301	ATP-dependent Clp protease proteolytic subunit [Synechococcus sp. PCC 7002]	gi|170077811	22 kDa	29.249	27.164	20.927	26.314	26.633	24.562
302	CTP synthetase [Synechococcus sp. PCC 7002]	gi|170078029	62 kDa	11.7	13.582	6.6966	10.526	16.17	13.226
303	ATP-dependent Clp protease, proteolytic subunit ClpP [Synechococcus sp. PCC 7002]	gi|170078453	22 kDa	21.937	16.778	18.416	13.157	12.366	38.732
304	hypothetical protein SYNPCC7002_A2052 [Synechococcus sp. PCC 7002]	gi|170078656	27 kDa	17.549	14.381	25.949	64.469	33.292	29.285
305	cysteinyl-tRNA synthetase [Synechococcus sp. PCC 7002]	gi|170079458	53 kDa	4.3873	9.5872	15.067	10.526	12.366	15.115
306	dTDP-glucose 4-6-dehydratase [Synechococcus sp. PCC 7002]	gi|170078934	73 kDa	11.7	9.5872	8.3708	6.5785	8.5608	7.5575
307	branched-chain amino acid aminotransferase [Synechococcus sp. PCC 7002]	gi|170078469	34 kDa	20.474	30.36	20.09	32.892	27.585	25.507
308	hypothetical protein SYNPCC7002_A2737 [Synechococcus sp. PCC 7002]	gi|170079329	46 kDa	4.3873	3.1957	2.5112	3.9471	6.6584	0.94469
309	ParA family chromosome partitioning ATPase [Synechococcus sp. PCC 7002]	gi|170077060	51 kDa	5.8498	11.185	7.5337	6.5785	9.512	8.5022
310	glycine cleavage system protein H [Synechococcus sp. PCC 7002]	gi|170076979	15 kDa	8.7747	19.973	30.135	26.314	20.926	24.562
311	RNA-binding protein [Synechococcus sp. PCC 7002]	gi|170077883	16 kDa	8.7747	18.375	14.23	14.473	18.073	21.728
312	twitching motility protein [Synechococcus sp. PCC 7002]	gi|170077320	40 kDa	14.624	20.772	10.045	10.526	12.366	12.281
313	50S ribosomal protein L19 [Synechococcus sp. PCC 7002]	gi|170077653	14 kDa	24.862	24.767	25.112	32.892	23.78	33.064
314	D-alanyl-D-alanine carboxypeptidase/D-alanyl-D-alanine-endopeptidase [Synechococcus sp. PCC 7002]	gi|170077438	52 kDa	27.786	30.36	47.714	23.682	22.829	21.728
315	phosphoribosylaminoimidazole-succinocarboxamide synthase [Synechococcus sp. PCC 7002]	gi|170076945	28 kDa	24.862	19.973	22.601	31.577	24.731	21.728
316	4-alpha-glucanotransferase [Synechococcus sp. PCC 7002]	gi|170076958	53 kDa	8.7747	12.783	10.045	5.2628	9.512	8.5022
317	50S ribosomal protein L24 [Synechococcus sp. PCC 7002]	gi|170077674	13 kDa	17.549	25.566	40.18	57.89	21.878	31.175
318	global nitrogen regulator [Synechococcus sp. PCC 7002]	gi|170078282	25 kDa	14.624	15.18	17.579	17.104	13.317	17.004
319	hypothetical protein SYNPCC7002_A2672 [Synechococcus sp. PCC 7002]	gi|170079265	18 kDa	13.162	15.18	18.416	23.682	21.878	24.562
320	hypothetical protein SYNPCC7002_G0130 [Synechococcus sp. PCC 7002]	gi|170076600	27 kDa	24.862	20.772	25.112	21.051	19.024	22.673
321	glutathione S-transferase [Synechococcus sp. PCC 7002]	gi|170076751	30 kDa	21.937	21.571	24.275	9.2098	19.975	17.004
322	cysteine synthase A [Synechococcus sp. PCC 7002]	gi|170076876	34 kDa	10.237	11.984	19.253	10.526	14.268	12.281
323	acetylornithine aminotransferase [Synechococcus sp. PCC 7002]	gi|170076954	45 kDa	26.324	21.571	22.601	21.051	19.024	16.06
324	L-asparaginase II (thermolabile) [Synechococcus sp. PCC 7002]	gi|170077710-DECOY	?	0	0	0	0	1.9024	0
325	bifunctional glycine oxidase (ThiO) and thiazole biosynthesis protein ThiG [Synechococcus sp. PCC 7002]	gi|170078432	71 kDa	8.7747	9.5872	8.3708	6.5785	10.463	10.392
326	threonine synthase [Synechococcus sp. PCC 7002]	gi|170078011	39 kDa	10.237	16.778	21.764	22.367	20.926	15.115
327	N-methylhydantoinase A [Synechococcus sp. PCC 7002]	gi|170079108	131 kDa	2.9249	4.7936	0	0	2.8536	1.8894
328	4-hydroxy-3-methylbut-2-enyl diphosphate reductase [Synechococcus sp. PCC 7002]	gi|170077142	45 kDa	1.4624	4.7936	4.1854	3.9471	4.756	4.7234
329	ABC transporter ATP-binding protein [Synechococcus sp. PCC 7002]	gi|170077249	72 kDa	4.3873	9.5872	5.8596	6.5785	11.414	7.5575
330	Dps family DNA-binding stress response protein [Synechococcus sp. PCC 7002]	gi|170076667	18 kDa	27.786	21.571	26.787	22.367	20.926	22.673
331	methylthioadenosine phosphorylase [Synechococcus sp. PCC 7002]	gi|170076741	31 kDa	27.786	28.762	39.343	26.314	28.536	34.009
332	3-deoxy-7-phosphoheptulonate synthase [Synechococcus sp. PCC 7002]	gi|170078431	38 kDa	19.012	21.571	16.742	22.367	20.926	22.673
333	TonB dependent receptor [Synechococcus sp. PCC 7002]	gi|170076476	91 kDa	27.786	40.746	56.921	0	0	0
334	protein phosphatase 2C [Synechococcus sp. PCC 7002]	gi|170077079	27 kDa	26.324	21.571	22.601	28.945	20.926	19.838
335	threonine dehydratase [Synechococcus sp. PCC 7002]	gi|170078224	56 kDa	8.7747	7.9893	4.1854	3.9471	6.6584	4.7234
336	2-phosphopyruvate hydratase [Synechococcus sp. PCC 7002]	gi|170076708	46 kDa	27.786	23.968	23.438	36.839	23.78	31.175
337	alcohol dehydrogenase [Synechococcus sp. PCC 7002]	gi|170077490	40 kDa	5.8498	17.577	14.23	3.9471	14.268	16.06
338	solanesyl diphosphate synthase [Synechococcus sp. PCC 7002]	gi|170077205	35 kDa	11.7	9.5872	10.882	9.2098	7.6096	11.336
339	NAD-dependent epimerase/dehydratase family protein [Synechococcus sp. PCC 7002]	gi|170078425	35 kDa	21.937	15.979	24.275	23.682	16.17	18.894
340	glycosyl hydrolase family protein [Synechococcus sp. PCC 7002]	gi|170076748	86 kDa	13.162	15.18	7.5337	2.6314	9.512	9.4469
341	light-repressed protein LrtA [Synechococcus sp. PCC 7002]	gi|170076891	22 kDa	29.249	27.963	20.09	40.786	28.536	33.064
342	hypothetical protein SYNPCC7002_A0238 [Synechococcus sp. PCC 7002]	gi|170076868	36 kDa	19.012	29.561	54.41	26.314	22.829	22.673
343	triosephosphate isomerase [Synechococcus sp. PCC 7002]	gi|170077220	27 kDa	19.012	15.18	24.275	32.892	18.073	17.949
344	30S ribosomal protein S8 [Synechococcus sp. PCC 7002]	gi|170077672	15 kDa	14.624	10.386	6.6966	11.841	13.317	10.392
345	argininosuccinate lyase [Synechococcus sp. PCC 7002]	gi|170079082	52 kDa	7.3122	11.984	4.1854	3.9471	12.366	8.5022
346	GUN4-like protein; putative Mg-protoporphyrin IX binding protein [Synechococcus sp. PCC 7002]	gi|170078639	26 kDa	8.7747	12.783	12.556	14.473	18.073	17.949
347	TonB-dependent siderophore receptor [Synechococcus sp. PCC 7002]	gi|170076568	91 kDa	39.486	37.55	54.41	0	0	0
348	transcription elongation factor NusA [Synechococcus sp. PCC 7002]	gi|170077376	47 kDa	30.711	27.164	19.253	24.998	31.389	29.285
349	transcription antitermination protein NusB [Synechococcus sp. PCC 7002]	gi|170077553	24 kDa	17.549	18.375	25.112	27.63	19.975	23.617
350	O-methyltransferase [Synechococcus sp. PCC 7002]	gi|170077946	36 kDa	5.8498	13.582	21.764	14.473	9.512	7.5575
351	ribonucleotide reductase subunit alpha [Synechococcus sp. PCC 7002]	gi|170077964	88 kDa	2.9249	7.1904	0.83708	0	3.8048	0.94469
352	phosphoribosylamine--glycine ligase [Synechococcus sp. PCC 7002]	gi|170078015	45 kDa	8.7747	16.778	20.927	9.2098	19.975	16.06
353	50S ribosomal protein L9 [Synechococcus sp. PCC 7002]	gi|170078107	17 kDa	23.399	19.973	30.135	42.102	27.585	31.175
354	hypothetical protein SYNPCC7002_A2272 [Synechococcus sp. PCC 7002]	gi|170078868	57 kDa	2.9249	7.9893	14.23	2.6314	7.6096	5.6681
355	methionyl-tRNA synthetase [Synechococcus sp. PCC 7002]	gi|170079299	60 kDa	4.3873	10.386	13.393	14.473	11.414	14.17
356	NADH dehydrogenase subunit K [Synechococcus sp. PCC 7002]	gi|22652005	27 kDa	1.4624	16.778	5.8596	3.9471	15.219	20.783
357	30S ribosomal protein S6 [Synechococcus sp. PCC 7002]	gi|170077069	13 kDa	21.937	21.571	25.112	24.998	24.731	28.341
358	phenylalanyl-tRNA synthetase subunit alpha [Synechococcus sp. PCC 7002]	gi|170077118	38 kDa	10.237	11.185	13.393	5.2628	11.414	16.06
359	DRTGG domain-containing protein [Synechococcus sp. PCC 7002]	gi|170077367	40 kDa	17.549	17.577	16.742	15.788	19.024	17.004
360	deoxyribose-phosphate aldolase [Synechococcus sp. PCC 7002]	gi|170077379	25 kDa	8.7747	10.386	9.2079	7.8941	8.5608	7.5575
361	modulator of DNA gyrase [Synechococcus sp. PCC 7002]	gi|170079316	28 kDa	19.012	20.772	24.275	19.735	18.073	17.004
362	flavin reductase-like domain-containing protein [Synechococcus sp. PCC 7002]	gi|170077191	17 kDa	14.624	23.169	30.972	21.051	19.975	23.617
363	AMP-binding protein [Synechococcus sp. PCC 7002]	gi|170078582	66 kDa	8.7747	14.381	16.742	13.157	19.975	19.838
364	DNA polymerase III subunit beta [Synechococcus sp. PCC 7002]	gi|170077879	43 kDa	14.624	19.973	19.253	28.945	28.536	22.673
365	hypothetical protein SYNPCC7002_A1376 [Synechococcus sp. PCC 7002]	gi|170077990	64 kDa	13.162	13.582	10.045	7.8941	18.073	12.281
366	apocytochrome f precurser [Synechococcus sp. PCC 7002]	gi|142187	35 kDa	13.162	16.778	41.017	21.051	19.024	19.838
367	M48 family peptidase [Synechococcus sp. PCC 7002]	gi|170078178	32 kDa	14.624	10.386	15.067	18.42	13.317	7.5575
368	phosphatase [Synechococcus sp. PCC 7002]	gi|170077515-DECOY	?	2.9249	0	0.83708	0	0	0
369	phytoene dehydrogenase [Synechococcus sp. PCC 7002]	gi|170078540	53 kDa	2.9249	12.783	4.1854	5.2628	7.6096	4.7234
370	membrane-bound lytic transglycosylase A [Synechococcus sp. PCC 7002]	gi|170078965	43 kDa	11.7	17.577	36.831	10.526	14.268	22.673
371	Serine/threonine protein kinase [Synechococcus sp. PCC 7002]	gi|170078289	53 kDa	0	1.5979	0	0	1.9024	0.94469
372	50S ribosomal protein L14 [Synechococcus sp. PCC 7002]	gi|170077675	13 kDa	24.862	21.571	24.275	46.049	24.731	21.728
373	putative OxPP cycle protein opcA [Synechococcus sp. PCC 7002]	gi|170078067	48 kDa	35.099	16.778	18.416	9.2098	16.17	14.17
374	GDP-mannose 4,6-dehydratase [Synechococcus sp. PCC 7002]	gi|170079159	41 kDa	13.162	11.984	12.556	11.841	10.463	14.17
375	S-adenosylmethionine synthetase [Synechococcus sp. PCC 7002]	gi|170078321	45 kDa	19.012	17.577	14.23	14.473	15.219	16.06
376	peptidase P (Xaa-Pro aminopeptidase) [Synechococcus sp. PCC 7002]	gi|170076980	49 kDa	14.624	8.7883	11.719	11.841	14.268	17.004
377	GTP-binding protein EngA [Synechococcus sp. PCC 7002]	gi|170076756	51 kDa	2.9249	3.1957	0.83708	2.6314	1.9024	3.7788
378	hypothetical protein SYNPCC7002_A0942 [Synechococcus sp. PCC 7002]	gi|170077564	21 kDa	27.786	19.174	22.601	30.261	22.829	19.838
379	CO2 hydration protein [Synechococcus sp. PCC 7002]	gi|170078413	43 kDa	2.9249	7.1904	3.3483	2.6314	5.7072	9.4469
380	Fe-S oxidoreductase [Synechococcus sp. PCC 7002]	gi|170079047	99 kDa	0	1.5979	0	0	3.8048	2.8341
381	acetolactate synthase 3 catalytic subunit [Synechococcus sp. PCC 7002]	gi|170079383	64 kDa	16.087	16.778	5.8596	7.8941	17.122	12.281
382	glycerol-3-phosphate dehydrogenase [Synechococcus sp. PCC 7002]	gi|170079437	63 kDa	5.8498	8.7883	0.83708	3.9471	8.5608	8.5022
383	translation elongation factor P [Synechococcus sp. PCC 7002]	gi|170076688	21 kDa	11.7	16.778	26.787	21.051	18.073	16.06
384	hypothetical protein SYNPCC7002_A0271 [Synechococcus sp. PCC 7002]	gi|170076899	77 kDa	7.3122	11.984	3.3483	0	6.6584	1.8894
385	hypothetical protein SYNPCC7002_A1298 [Synechococcus sp. PCC 7002]	gi|170077913	24 kDa	13.162	11.185	11.719	19.735	21.878	14.17
386	uridylate kinase [Synechococcus sp. PCC 7002]	gi|170077574	26 kDa	27.786	19.973	20.927	36.839	34.243	29.285
387	putative penicillin-binding protein [Synechococcus sp. PCC 7002]	gi|170078531	82 kDa	4.3873	3.1957	0.83708	0	2.8536	0.94469
388	subtilase domain-containing protein [Synechococcus sp. PCC 7002]	gi|170077584	59 kDa	7.3122	10.386	25.949	5.2628	7.6096	12.281
389	acetyl-CoA carboxylase carboxyltransferase subunit alpha [Synechococcus sp. PCC 7002]	gi|170079038	36 kDa	17.549	12.783	9.2079	14.473	14.268	13.226
390	NADH dehydrogenase subunit J [Synechococcus sp. PCC 7002]	gi|170079341	20 kDa	21.937	19.973	38.506	13.157	19.024	22.673
391	ribulose-phosphate 3-epimerase [Synechococcus sp. PCC 7002]	gi|170076952	25 kDa	14.624	30.36	22.601	26.314	42.804	47.234
392	two-component response regulator [Synechococcus sp. PCC 7002]	gi|170077923	28 kDa	20.474	18.375	23.438	19.735	22.829	24.562
393	ATP-dependent protease ATP-binding subunit ClpX [Synechococcus sp. PCC 7002]	gi|170078143	49 kDa	8.7747	8.7883	1.6742	1.3157	6.6584	4.7234
394	hypothetical protein SYNPCC7002_A2447 [Synechococcus sp. PCC 7002]	gi|170079042	70 kDa	4.3873	4.7936	1.6742	0	5.7072	4.7234
395	30S ribosomal protein S18 [Synechococcus sp. PCC 7002]	gi|170077198	8 kDa	23.399	27.164	30.135	27.63	29.487	36.843
396	acetolactate synthase 3 regulatory subunit [Synechococcus sp. PCC 7002]	gi|170079297	19 kDa	19.012	15.18	13.393	13.157	22.829	21.728
397	dioxygenase [Synechococcus sp. PCC 7002]	gi|170076692	34 kDa	7.3122	18.375	25.112	5.2628	12.366	13.226
398	excinuclease ABC subunit A [Synechococcus sp. PCC 7002]	gi|170078077	105 kDa	8.7747	2.3968	0	0	2.8536	2.8341
399	NAD dependent epimerase/dehydratase family protein [Synechococcus sp. PCC 7002]	gi|170078373	35 kDa	4.3873	15.18	20.927	13.157	18.073	17.949
400	fructose-1,6-bisphosphatase [Synechococcus sp. PCC 7002]	gi|170076957	39 kDa	32.174	19.973	12.556	14.473	17.122	12.281
401	molecular chaperone DnaK [Synechococcus sp. PCC 7002]	gi|170077317	71 kDa	8.7747	15.18	10.045	9.2098	11.414	11.336
402	NADH dehydrogenase subunit I [Synechococcus sp. PCC 7002]	gi|170077547	23 kDa	20.474	16.778	11.719	21.051	25.682	27.396
403	hypothetical protein SYNPCC7002_A1500 [Synechococcus sp. PCC 7002]	gi|170078109	84 kDa	14.624	14.381	10.045	10.526	10.463	11.336
404	hypothetical protein SYNPCC7002_A2351 [Synechococcus sp. PCC 7002]	gi|170078946	32 kDa	2.9249	3.9947	5.8596	2.6314	4.756	3.7788
405	polyphosphate kinase [Synechococcus sp. PCC 7002]	gi|170079020	82 kDa	7.3122	5.5925	0.83708	2.6314	3.8048	3.7788
406	prohibitin [Synechococcus sp. PCC 7002]	gi|170079200	31 kDa	17.549	16.778	8.3708	17.104	20.926	16.06
407	diaminopimelate epimerase [Synechococcus sp. PCC 7002]	gi|170078250	30 kDa	14.624	19.973	23.438	22.367	22.829	17.004
408	hypothetical protein SYNPCC7002_A1761 [Synechococcus sp. PCC 7002]	gi|170078368	30 kDa	11.7	10.386	18.416	13.157	11.414	12.281
409	hypothetical protein SYNPCC7002_A1020 [Synechococcus sp. PCC 7002]	gi|170077641	54 kDa	10.237	14.381	30.135	9.2098	12.366	17.949
410	Chain A, The Three-Dimensional Solution Structure Of Psae From The Cyanobacterium Synechococcus Sp. Strain Pcc 7002: A Photosystem I Protein That Shows Structural Homology With Sh3 Domains	gi|159162852 (+1)	8 kDa	14.624	11.984	21.764	28.945	25.682	30.23
411	chorismate synthase [Synechococcus sp. PCC 7002]	gi|170078745	39 kDa	4.3873	11.185	3.3483	0	4.756	6.6128
412	2-isopropylmalate synthase [Synechococcus sp. PCC 7002]	gi|170077970	58 kDa	27.786	20.772	13.393	7.8941	17.122	8.5022
413	hypothetical protein SYNPCC7002_A1603 [Synechococcus sp. PCC 7002]	gi|170078211	88 kDa	7.3122	11.185	17.579	1.3157	7.6096	4.7234
414	hypothetical protein SYNPCC7002_A2510 [Synechococcus sp. PCC 7002]	gi|170079105	73 kDa	2.9249	17.577	4.1854	2.6314	14.268	7.5575
415	glucosamine--fructose-6-phosphate aminotransferase [Synechococcus sp. PCC 7002]	gi|170077768	69 kDa	19.012	12.783	4.1854	2.6314	18.073	13.226
416	ferredoxin-thioredoxin reductase catalytic chain [Synechococcus sp. PCC 7002]	gi|170078457	13 kDa	4.3873	8.7883	18.416	13.157	12.366	15.115
417	hypothetical protein SYNPCC7002_G0074 [Synechococcus sp. PCC 7002]	gi|170076544	60 kDa	2.9249	9.5872	20.927	2.6314	6.6584	11.336
418	N-acetylmuramoyl-L-alanine amidase [Synechococcus sp. PCC 7002]	gi|170077209	64 kDa	16.087	13.582	24.275	26.314	13.317	12.281
419	50S ribosomal protein L15 [Synechococcus sp. PCC 7002]	gi|170077668	15 kDa	20.474	15.979	14.23	52.628	17.122	17.949
420	hypothetical protein SYNPCC7002_A0129 [Synechococcus sp. PCC 7002]	gi|170076762	14 kDa	29.249	23.169	30.135	34.208	22.829	26.451
421	tryptophan synthase subunit beta [Synechococcus sp. PCC 7002]	gi|170076924	45 kDa	13.162	7.1904	6.6966	17.104	18.073	14.17
422	30S ribosomal protein S9 [Synechococcus sp. PCC 7002]	gi|170077658	15 kDa	23.399	19.174	20.927	35.524	21.878	18.894
423	methyl-accepting chemotaxis protein [Synechococcus sp. PCC 7002]	gi|170077986	98 kDa	2.9249	5.5925	6.6966	3.9471	2.8536	1.8894
424	adenylylsulfate kinase [Synechococcus sp. PCC 7002]	gi|170078103	20 kDa	10.237	13.582	16.742	23.682	22.829	19.838
425	cation-transporting P-type ATPase [Synechococcus sp. PCC 7002]	gi|170079204	83 kDa	0	2.3968	0	0	0	0
426	universal stress protein family protein [Synechococcus sp. PCC 7002]	gi|170078539	32 kDa	11.7	18.375	24.275	15.788	19.975	18.894
427	DNA-directed RNA polymerase subunit omega [Synechococcus sp. PCC 7002]	gi|170077238	9 kDa	4.3873	15.18	21.764	5.2628	15.219	15.115
428	HEAT repeat-containing PBS lyase [Synechococcus sp. PCC 7002]	gi|170076976	24 kDa	23.399	23.169	33.483	28.945	28.536	25.507
429	RNA-binding protein [Synechococcus sp. PCC 7002]	gi|170076900	10 kDa	17.549	13.582	17.579	22.367	16.17	17.004
430	hypothetical protein SYNPCC7002_A1068 [Synechococcus sp. PCC 7002]	gi|170077688	63 kDa	16.087	16.778	19.253	14.473	14.268	18.894
431	Ser/Thr protein kinase SpkA [Synechococcus sp. PCC 7002]	gi|170078272	61 kDa	2.9249	2.3968	0.83708	2.6314	1.9024	2.8341
432	diaminopimelate decarboxylase [Synechococcus sp. PCC 7002]	gi|170076731	50 kDa	16.087	13.582	11.719	14.473	17.122	13.226
433	chaperone protein DnaJ [Synechococcus sp. PCC 7002]	gi|170077316	40 kDa	4.3873	9.5872	4.1854	3.9471	8.5608	5.6681
434	alpha amylase subunit A [Synechococcus sp. PCC 7002]	gi|170077507	77 kDa	4.3873	3.9947	0.83708	1.3157	1.9024	1.8894
435	CRISPR-associated autoregulator DevR family protein [Synechococcus sp. PCC 7002]	gi|170078380	32 kDa	4.3873	8.7883	9.2079	10.526	10.463	8.5022
436	citrate synthase [Synechococcus sp. PCC 7002]	gi|170079217	43 kDa	11.7	14.381	9.2079	13.157	16.17	13.226
437	acetyl-CoA carboxylase subunit beta [Synechococcus sp. PCC 7002]	gi|170076693	36 kDa	2.9249	6.3915	3.3483	1.3157	6.6584	4.7234
438	short-chain dehydrogenase/reductase [Synechococcus sp. PCC 7002]	gi|170076719	24 kDa	17.549	15.979	20.09	14.473	18.073	17.004
439	histidyl-tRNA synthetase [Synechococcus sp. PCC 7002]	gi|170078871	47 kDa	7.3122	7.1904	3.3483	5.2628	4.756	6.6128
440	hypothetical protein SYNPCC7002_A0491 [Synechococcus sp. PCC 7002]	gi|170077116	78 kDa	10.237	11.984	18.416	11.841	9.512	15.115
441	nicotinamide nucleotide transhydrogenase subunit beta [Synechococcus sp. PCC 7002]	gi|170077605	48 kDa	5.8498	9.5872	5.0225	1.3157	13.317	4.7234
442	M23/M37 family metalloendoprotease [Synechococcus sp. PCC 7002]	gi|170078252	33 kDa	14.624	20.772	29.298	14.473	16.17	18.894
443	cyanophycin synthetase [Synechococcus sp. PCC 7002]	gi|170079000	97 kDa	8.7747	11.984	6.6966	1.3157	5.7072	4.7234
444	hypothetical protein SYNPCC7002_A2419 [Synechococcus sp. PCC 7002]	gi|170079014	61 kDa	2.9249	7.9893	6.6966	1.3157	8.5608	5.6681
445	sensory transduction histidine kinase [Synechococcus sp. PCC 7002]	gi|170077998	75 kDa	5.8498	10.386	2.5112	1.3157	6.6584	3.7788
446	imidazoleglycerol-phosphate dehydratase [Synechococcus sp. PCC 7002]	gi|170077432	28 kDa	10.237	20.772	29.298	15.788	20.926	23.617
447	HEAT repeat-containing protein [Synechococcus sp. PCC 7002]	gi|170078049	24 kDa	14.624	22.37	25.112	19.735	15.219	11.336
448	long-chain-fatty-acid CoA ligase [Synechococcus sp. PCC 7002]	gi|170077298	72 kDa	17.549	19.174	8.3708	1.3157	11.414	7.5575
449	Zn-dependent hydrolase [Synechococcus sp. PCC 7002]	gi|170079451	25 kDa	11.7	14.381	23.438	31.577	19.024	19.838
450	glutamine synthetase, type I [Synechococcus sp. PCC 7002]	gi|170078238	53 kDa	5.8498	5.5925	0.83708	1.3157	5.7072	4.7234
451	heptosyltransferase family protein [Synechococcus sp. PCC 7002]	gi|170078509	35 kDa	19.012	19.174	11.719	17.104	19.024	18.894
452	PLAT repeat-containing protein [Synechococcus sp. PCC 7002]	gi|170079432	62 kDa	4.3873	10.386	25.112	1.3157	2.8536	0.94469
453	aldo-keto reductase [Synechococcus sp. PCC 7002]	gi|85062654	36 kDa	23.399	18.375	23.438	21.051	17.122	23.617
454	transcription-repair coupling factor [Synechococcus sp. PCC 7002]	gi|170077902-DECOY	?	1.4624	0	0	0	0	1.8894
455	hypothetical protein SYNPCC7002_A1950 [Synechococcus sp. PCC 7002]	gi|170078555	20 kDa	14.624	16.778	15.067	9.2098	16.17	17.949
456	phosphoglyceromutase [Synechococcus sp. PCC 7002]	gi|170078830	57 kDa	4.3873	7.1904	11.719	11.841	19.024	14.17
457	prolyl oligopeptidase family protein [Synechococcus sp. PCC 7002]	gi|170079328	71 kDa	4.3873	11.984	10.882	3.9471	8.5608	6.6128
458	amidophosphoribosyltransferase [Synechococcus sp. PCC 7002]	gi|170077175	53 kDa	4.3873	5.5925	2.5112	11.841	23.78	17.004
459	hypothetical protein SYNPCC7002_A1366 [Synechococcus sp. PCC 7002]	gi|170077980	24 kDa	23.399	34.354	26.787	17.104	21.878	28.341
460	phosphoribosylformylglycinamidine synthase I [Synechococcus sp. PCC 7002]	gi|170078154	25 kDa	10.237	7.9893	11.719	13.157	10.463	11.336
461	cysteine desulfurase activator complex subunit SufB [Synechococcus sp. PCC 7002]	gi|170078420	53 kDa	1.4624	7.9893	0.83708	2.6314	14.268	11.336
462	homoserine dehydrogenase [Synechococcus sp. PCC 7002]	gi|170078730	46 kDa	20.474	15.979	13.393	21.051	18.073	15.115
463	seryl-tRNA synthetase [Synechococcus sp. PCC 7002]	gi|170078923	48 kDa	13.162	12.783	10.045	10.526	14.268	16.06
464	hypothetical protein SYNPCC7002_A2834 [Synechococcus sp. PCC 7002]	gi|170079420	25 kDa	7.3122	8.7883	17.579	6.5785	7.6096	13.226
465	type I secretion system ATPase (ABC transporter) [Synechococcus sp. PCC 7002]	gi|170076539-DECOY	?	0	0.79893	0	0	1.9024	0.94469
466	naphthoate synthase [Synechococcus sp. PCC 7002]	gi|170076896	31 kDa	11.7	14.381	6.6966	7.8941	16.17	16.06
467	pyruvate dehydrogenase E1 beta chain [Synechococcus sp. PCC 7002]	gi|170077278	36 kDa	20.474	15.18	12.556	13.157	19.024	20.783
468	hypothetical protein SYNPCC7002_A0929 [Synechococcus sp. PCC 7002]	gi|170077551	31 kDa	29.249	15.18	13.393	26.314	26.633	23.617
469	dihydroorotate dehydrogenase 2 [Synechococcus sp. PCC 7002]	gi|170078793	42 kDa	16.087	10.386	6.6966	7.8941	12.366	9.4469
470	hypothetical protein SYNPCC7002_A2597 [Synechococcus sp. PCC 7002]	gi|170079191	106 kDa	2.9249	2.3968	9.2079	1.3157	0	0.94469
471	methyl-accepting chemotaxis like protein [Synechococcus sp. PCC 7002]	gi|170079193	108 kDa	13.162	18.375	12.556	9.2098	8.5608	7.5575
472	CobW/P47K family protein [Synechococcus sp. PCC 7002]	gi|170079249	43 kDa	14.624	15.979	14.23	19.735	18.073	18.894
473	FHA domain-containing protein [Synechococcus sp. PCC 7002]	gi|170079325	73 kDa	14.624	6.3915	3.3483	0	8.5608	2.8341
474	Ycf48-like protein [Synechococcus sp. PCC 7002]	gi|170076859	37 kDa	14.624	11.185	9.2079	10.526	14.268	19.838
475	glutamate/leucine/phenylalanine/valine dehydrogenase [Synechococcus sp. PCC 7002]	gi|170077396	47 kDa	2.9249	3.1957	2.5112	1.3157	0.9512	0.94469
476	ICE-like protease [Synechococcus sp. PCC 7002]	gi|170076734	73 kDa	8.7747	8.7883	24.275	3.9471	15.219	14.17
477	glutathione peroxidase [Synechococcus sp. PCC 7002]	gi|170077591	17 kDa	16.087	11.984	24.275	24.998	16.17	17.004
478	hypothetical protein SYNPCC7002_A1478 [Synechococcus sp. PCC 7002]	gi|170078087	11 kDa	7.3122	11.185	19.253	7.8941	11.414	11.336
479	rRNA methyltransferase [Synechococcus sp. PCC 7002]	gi|170077013	43 kDa	4.3873	6.3915	2.5112	1.3157	5.7072	5.6681
480	transcription antitermination protein NusG [Synechococcus sp. PCC 7002]	gi|170077651	23 kDa	19.012	22.37	24.275	27.63	24.731	27.396
481	50S ribosomal protein L16 [Synechococcus sp. PCC 7002]	gi|170077678	16 kDa	27.786	19.973	16.742	31.577	21.878	24.562
482	YrdC domain-containing protein [Synechococcus sp. PCC 7002]	gi|170078339	23 kDa	26.324	25.566	35.157	32.892	27.585	25.507
483	FeS assembly ATPase SufC [Synechococcus sp. PCC 7002]	gi|170078419	28 kDa	10.237	11.984	21.764	18.42	13.317	15.115
484	hypothetical protein SYNPCC7002_A2392 [Synechococcus sp. PCC 7002]	gi|170078987	65 kDa	5.8498	8.7883	20.927	3.9471	10.463	15.115
485	oxidoreductase FAD/FMN-binding protein [Synechococcus sp. PCC 7002]	gi|170079040	40 kDa	14.624	13.582	15.067	21.051	16.17	15.115
486	anthranilate synthetase alpha-subunit [Synechococcus sp. PCC 7002]	gi|170077304	57 kDa	8.7747	7.9893	5.8596	2.6314	8.5608	6.6128
487	glycogen branching protein [Synechococcus sp. PCC 7002]	gi|170078471	90 kDa	7.3122	7.9893	3.3483	3.9471	4.756	6.6128
488	Reiske iron-sulfur protein [Synechococcus sp. PCC 7002]	gi|142186	19 kDa	10.237	15.18	10.882	14.473	14.268	28.341
489	TPR repeat-containing glycosyl transferase [Synechococcus sp. PCC 7002]	gi|170076814	44 kDa	2.9249	17.577	11.719	6.5785	15.219	17.949
490	urease subunit alpha [Synechococcus sp. PCC 7002]	gi|170076824	62 kDa	8.7747	6.3915	3.3483	7.8941	8.5608	8.5022
491	bacterioferritin [Synechococcus sp. PCC 7002]	gi|170079257	18 kDa	36.561	24.767	14.23	28.945	14.268	24.562
492	dihydrodipicolinate reductase [Synechococcus sp. PCC 7002]	gi|170077503	29 kDa	4.3873	13.582	12.556	10.526	18.073	15.115
493	50S ribosomal protein L23 [Synechococcus sp. PCC 7002]	gi|170077683	12 kDa	23.399	15.979	15.067	15.788	15.219	17.949
494	hypothetical protein SYNPCC7002_A1684 [Synechococcus sp. PCC 7002]	gi|170078291	66 kDa	0	1.5979	0	0	0.9512	0
495	putative FAD-dependent dehydrogenase [Synechococcus sp. PCC 7002]	gi|170077479	59 kDa	0	1.5979	1.6742	0	0.9512	0.94469
496	acetyl-CoA synthetase [Synechococcus sp. PCC 7002]	gi|170078619	100 kDa	2.9249	2.3968	0.83708	0	1.9024	0.94469
497	mannose-1-phosphate guanyltransferase [Synechococcus sp. PCC 7002]	gi|170077571	93 kDa	7.3122	7.1904	2.5112	2.6314	6.6584	1.8894
498	50S ribosomal protein L17 [Synechococcus sp. PCC 7002]	gi|170077661	13 kDa	17.549	18.375	17.579	15.788	19.024	23.617
499	hypothetical protein SYNPCC7002_A1711 [Synechococcus sp. PCC 7002]	gi|170078318	44 kDa	8.7747	11.984	8.3708	3.9471	14.268	13.226
500	GTP cyclohydrolase I [Synechococcus sp. PCC 7002]	gi|170079039	27 kDa	8.7747	13.582	8.3708	5.2628	12.366	12.281
501	TPR repeat-containing protein [Synechococcus sp. PCC 7002]	gi|170079531	39 kDa	1.4624	3.9947	2.5112	3.9471	5.7072	2.8341
502	chromosome partitioning ATPase [Synechococcus sp. PCC 7002]	gi|170077536	37 kDa	7.3122	11.984	16.742	9.2098	14.268	15.115
503	hypothetical protein SYNPCC7002_A1479 [Synechococcus sp. PCC 7002]	gi|170078088	33 kDa	19.012	7.9893	14.23	47.365	12.366	11.336
504	pentapeptide repeat-containing protein [Synechococcus sp. PCC 7002]	gi|170079322	18 kDa	16.087	13.582	24.275	17.104	16.17	18.894
505	inositol-1-monophosphatase family protein [Synechococcus sp. PCC 7002]	gi|170077247	31 kDa	19.012	12.783	16.742	17.104	15.219	12.281
506	photosystem q(b) protein [Synechococcus sp. PCC 7002]	gi|170078027 (+1)	40 kDa	24.862	16.778	9.2079	21.051	20.926	16.06
507	hypothetical protein SYNPCC7002_A2388 [Synechococcus sp. PCC 7002]	gi|170078983	40 kDa	11.7	13.582	5.0225	3.9471	16.17	13.226
508	valine--pyruvate transaminase [Synechococcus sp. PCC 7002]	gi|170076865	47 kDa	16.087	11.185	12.556	17.104	17.122	15.115
509	magnesium transporter [Synechococcus sp. PCC 7002]	gi|170076901	50 kDa	7.3122	10.386	6.6966	5.2628	9.512	3.7788
510	thiamine-phosphate pyrophosphorylase [Synechococcus sp. PCC 7002]	gi|170076907	40 kDa	5.8498	9.5872	3.3483	1.3157	8.5608	5.6681
511	diguanylate cyclase [Synechococcus sp. PCC 7002]	gi|170078108	60 kDa	1.4624	0.79893	0	0	1.9024	0.94469
512	cellulose synthase catalytic subunit [Synechococcus sp. PCC 7002]	gi|170078717	91 kDa	0	1.5979	1.6742	0	0	0.94469
513	hypothetical protein SYNPCC7002_A2171 [Synechococcus sp. PCC 7002]	gi|170078769	91 kDa	21.937	11.984	22.601	21.051	17.122	21.728
514	threonine synthase [Synechococcus sp. PCC 7002]	gi|170076914	47 kDa	8.7747	15.979	15.905	17.104	16.17	17.004
515	ABC transporter [Synechococcus sp. PCC 7002]	gi|170077443	66 kDa	11.7	11.185	5.8596	2.6314	9.512	6.6128
516	BLUF domain-containing protein [Synechococcus sp. PCC 7002]	gi|170077739	17 kDa	11.7	4.7936	5.8596	11.841	9.512	8.5022
517	hypothetical protein SYNPCC7002_A1433 [Synechococcus sp. PCC 7002]	gi|170078042	23 kDa	26.324	10.386	34.32	15.788	16.17	14.17
518	NAD synthetase [Synechococcus sp. PCC 7002]	gi|170078390	62 kDa	8.7747	8.7883	4.1854	2.6314	6.6584	5.6681
519	Ser/Thr protein kinase SpkA [Synechococcus sp. PCC 7002]	gi|170078272-DECOY	?	1.4624	3.1957	4.1854	2.6314	2.8536	0.94469
520	deoxyribopyrimidine photolyase [Synechococcus sp. PCC 7002]	gi|170079382	55 kDa	4.3873	7.1904	6.6966	2.6314	4.756	6.6128
521	hypothetical protein SYNPCC7002_A0425 [Synechococcus sp. PCC 7002]	gi|170077053	43 kDa	11.7	13.582	20.927	9.2098	2.8536	7.5575
522	regulatory component [Synechococcus sp. PCC 7002]	gi|170077233	26 kDa	10.237	9.5872	12.556	11.841	12.366	12.281
523	5,10-methylene-tetrahydrofolate dehydrogenase [Synechococcus sp. PCC 7002]	gi|170077511	31 kDa	4.3873	11.185	15.067	7.8941	10.463	11.336
524	2-phosphosulfolactate phosphatase [Synechococcus sp. PCC 7002]	gi|170078441	27 kDa	17.549	25.566	15.905	18.42	18.073	13.226
525	hypothetical protein SYNPCC7002_A2464 [Synechococcus sp. PCC 7002]	gi|170079059	77 kDa	11.7	9.5872	7.5337	6.5785	11.414	12.281
526	putative hydroxylase [Synechococcus sp. PCC 7002]	gi|170079252	24 kDa	24.862	19.174	16.742	1.3157	8.5608	8.5022
527	TldD/PmbA family protein [Synechococcus sp. PCC 7002]	gi|170079397	50 kDa	4.3873	3.9947	6.6966	5.2628	3.8048	3.7788
528	6-phosphofructokinase [Synechococcus sp. PCC 7002]	gi|170076794	38 kDa	8.7747	6.3915	8.3708	5.2628	9.512	7.5575
529	hypothetical protein SYNPCC7002_A1843 [Synechococcus sp. PCC 7002]	gi|170078449	75 kDa	8.7747	3.9947	0.83708	0	0.9512	0.94469
530	M61 glycyl aminopeptidase protein [Synechococcus sp. PCC 7002]	gi|170078468	69 kDa	4.3873	4.7936	2.5112	0	3.8048	2.8341
531	ribose-phosphate pyrophosphokinase [Synechococcus sp. PCC 7002]	gi|170079318	36 kDa	14.624	14.381	8.3708	5.2628	15.219	6.6128
532	hypothetical protein SYNPCC7002_A0078 [Synechococcus sp. PCC 7002]	gi|170076713	15 kDa	8.7747	10.386	11.719	7.8941	14.268	11.336
533	radical SAM domain-containing protein [Synechococcus sp. PCC 7002]	gi|170077758	50 kDa	0	1.5979	0.83708	0	0.9512	0.94469
534	LysR transcriptional regulator [Synechococcus sp. PCC 7002]	gi|170077815	36 kDa	13.162	13.582	9.2079	9.2098	16.17	17.004
535	hypothetical protein SYNPCC7002_A1330 [Synechococcus sp. PCC 7002]	gi|170077945	33 kDa	8.7747	13.582	9.2079	9.2098	10.463	8.5022
536	signal recognition particle-docking protein [Synechococcus sp. PCC 7002]	gi|170079379	59 kDa	8.7747	15.979	17.579	7.8941	10.463	17.004
537	ornithine carbamoyltransferase [Synechococcus sp. PCC 7002]	gi|170077297	33 kDa	10.237	15.18	15.067	21.051	13.317	15.115
538	Mg-protoporphyrin IX methyl transferase [Synechococcus sp. PCC 7002]	gi|170077530	26 kDa	5.8498	7.1904	7.5337	7.8941	6.6584	6.6128
539	lycopene cyclase CruA [Synechococcus sp. PCC 7002]	gi|170078751	75 kDa	1.4624	3.1957	1.6742	2.6314	3.8048	2.8341
540	aspartate aminotransferase [Synechococcus sp. PCC 7002]	gi|170078786	44 kDa	13.162	11.984	10.882	9.2098	11.414	8.5022
541	ATPase [Synechococcus sp. PCC 7002]	gi|170079041	63 kDa	0	1.5979	0	0	0	0
542	photosystem II reaction center protein Psb28 [Synechococcus sp. PCC 7002]	gi|170077874	13 kDa	7.3122	6.3915	8.3708	6.5785	4.756	4.7234
543	UDP-N-acetylmuramoyl-tripeptide--D-alanyl-D-alanine ligase [Synechococcus sp. PCC 7002]	gi|170079286	48 kDa	14.624	15.18	15.067	11.841	19.975	18.894
544	RecName: Full=Methylthioribose-1-phosphate isomerase; Short=M1Pi; Short=MTR-1-P isomerase; AltName: Full=S-methyl-5-thioribose-1-phosphate isomerase	gi|218527024	37 kDa	10.237	11.984	9.2079	5.2628	12.366	12.281
545	bifunctional pantoate ligase/cytidylate kinase [Synechococcus sp. PCC 7002]	gi|170076971	55 kDa	14.624	13.582	15.905	10.526	15.219	12.281
546	type IV pilus biogenesis protein [Synechococcus sp. PCC 7002]	gi|170077322	45 kDa	2.9249	5.5925	4.1854	2.6314	3.8048	2.8341
547	aspartate kinase [Synechococcus sp. PCC 7002]	gi|170077882	64 kDa	11.7	11.984	8.3708	15.788	19.975	16.06
548	ribose-5-phosphate isomerase A [Synechococcus sp. PCC 7002]	gi|170077884	24 kDa	13.162	19.174	20.09	11.841	19.975	20.783
549	putative carboxyl-terminal protease [Synechococcus sp. PCC 7002]	gi|170078450	50 kDa	10.237	7.9893	16.742	11.841	6.6584	10.392
550	S4 domain-containing protein [Synechococcus sp. PCC 7002]	gi|170079381	28 kDa	10.237	7.9893	14.23	10.526	11.414	11.336
551	6-phosphogluconate dehydrogenase [Synechococcus sp. PCC 7002]	gi|170076852-DECOY	?	0	0	0	0	1.9024	0
552	malic enzyme [Synechococcus sp. PCC 7002]	gi|170077074	49 kDa	21.937	17.577	7.5337	9.2098	15.219	8.5022
553	hypothetical protein SYNPCC7002_A1431 [Synechococcus sp. PCC 7002]	gi|170078040	51 kDa	16.087	2.3968	5.0225	1.3157	2.8536	1.8894
554	penicillin-binding protein 2 [Synechococcus sp. PCC 7002]	gi|170078216	65 kDa	0	1.5979	2.5112	0	1.9024	0.94469
555	hypothetical protein SYNPCC7002_A1705 [Synechococcus sp. PCC 7002]	gi|170078312	43 kDa	16.087	14.381	24.275	27.63	19.024	17.004
556	gamma-glutamyl phosphate reductase [Synechococcus sp. PCC 7002]	gi|170079208	46 kDa	8.7747	12.783	16.742	7.8941	14.268	9.4469
557	aldose 1-epimerase [Synechococcus sp. PCC 7002]	gi|170077078	33 kDa	13.162	16.778	22.601	7.8941	13.317	14.17
558	hypothetical protein SYNPCC7002_F0033 [Synechococcus sp. PCC 7002]	gi|170079586	32 kDa	4.3873	7.1904	5.0225	5.2628	3.8048	6.6128
559	group II sigma-70 type sigma factor [Synechococcus sp. PCC 7002]	gi|170076992	42 kDa	4.3873	5.5925	4.1854	5.2628	4.756	8.5022
560	DNA topoisomerase subunit A [Synechococcus sp. PCC 7002]	gi|170078543	94 kDa	1.4624	2.3968	0	0	1.9024	2.8341
561	nitrate reductase [Synechococcus sp. PCC 7002]	gi|170077929	82 kDa	0	0	0	0	1.9024	0
562	peptide chain release factor 3 [Synechococcus sp. PCC 7002]	gi|170078308	61 kDa	1.4624	3.9947	0.83708	1.3157	3.8048	4.7234
563	protein phosphatase 2C domain-containing protein [Synechococcus sp. PCC 7002]	gi|170078394	81 kDa	10.237	11.984	6.6966	0	9.512	7.5575
564	phytoene synthase [Synechococcus sp. PCC 7002]	gi|170078541	36 kDa	2.9249	3.1957	2.5112	0	2.8536	2.8341
565	hypothetical protein SYNPCC7002_A2671 [Synechococcus sp. PCC 7002]	gi|170079264	25 kDa	7.3122	16.778	8.3708	5.2628	10.463	9.4469
566	hypothetical protein SYNPCC7002_A0103 [Synechococcus sp. PCC 7002]	gi|170076736	12 kDa	2.9249	17.577	28.461	5.2628	14.268	22.673
567	1A family penicillin-binding protein [Synechococcus sp. PCC 7002]	gi|170076770	88 kDa	7.3122	6.3915	5.0225	0	2.8536	6.6128
568	group 2 sigma factor [Synechococcus sp. PCC 7002]	gi|170076898	46 kDa	4.3873	4.7936	3.3483	3.9471	3.8048	3.7788
569	hypothetical protein SYNPCC7002_A0354 [Synechococcus sp. PCC 7002]	gi|170076982	79 kDa	10.237	10.386	5.0225	1.3157	11.414	5.6681
570	adenylate kinase [Synechococcus sp. PCC 7002]	gi|170077666	21 kDa	29.249	15.979	26.787	30.261	22.829	22.673
571	response regulator receiver domain-containing protein [Synechococcus sp. PCC 7002]	gi|170078185	21 kDa	5.8498	14.381	23.438	5.2628	12.366	9.4469
572	putative anion transporting ATPase [Synechococcus sp. PCC 7002]	gi|170078784	44 kDa	8.7747	15.18	8.3708	2.6314	10.463	7.5575
573	SNF2 helicase [Synechococcus sp. PCC 7002]	gi|170077237	113 kDa	4.3873	1.5979	0	0	1.9024	0.94469
574	hypothetical protein SYNPCC7002_A0187 [Synechococcus sp. PCC 7002]	gi|170076818	35 kDa	14.624	11.185	18.416	21.051	13.317	20.783
575	ABC transporter ATPase [Synechococcus sp. PCC 7002]	gi|170077798	56 kDa	5.8498	8.7883	4.1854	0	6.6584	3.7788
576	tRNA (uracil-5-)-methyltransferase Gid [Synechococcus sp. PCC 7002]	gi|170078989	50 kDa	1.4624	7.1904	5.8596	1.3157	6.6584	5.6681
577	hypothetical protein SYNPCC7002_A0216 [Synechococcus sp. PCC 7002]	gi|170076847	37 kDa	16.087	11.185	5.8596	10.526	10.463	7.5575
578	DnaK-type molecular chaperone [Synechococcus sp. PCC 7002]	gi|170077102	59 kDa	1.4624	1.5979	1.6742	0	2.8536	1.8894
579	PsbP [Synechococcus sp. PCC 7002]	gi|170077918	21 kDa	10.237	12.783	12.556	10.526	11.414	14.17
580	allophycocyanin-associated phycobilisome core-linker polypeptide [Synechococcus sp. PCC 7002]	gi|170078533	8 kDa	13.162	11.984	19.253	17.104	14.268	18.894
581	extracellular solute-binding protein [Synechococcus sp. PCC 7002]	gi|170077071	63 kDa	14.624	12.783	13.393	9.2098	14.268	10.392
582	hypothetical protein SYNPCC7002_A1240 [Synechococcus sp. PCC 7002]	gi|170077856	14 kDa	7.3122	7.9893	8.3708	2.6314	6.6584	7.5575
583	von Willebrand factor type A domain-containing protein [Synechococcus sp. PCC 7002]	gi|170079352	44 kDa	13.162	14.381	18.416	10.526	16.17	14.17
584	acetolactate synthase [Synechococcus sp. PCC 7002]	gi|170079361	60 kDa	0	6.3915	2.5112	0	4.756	2.8341
585	flavodoxin FldA [Synechococcus sp. PCC 7002]	gi|170077906	18 kDa	21.937	35.153	46.039	0	1.9024	2.8341
586	cell division protein FtsZ [Synechococcus sp. PCC 7002]	gi|170076660	44 kDa	11.7	6.3915	10.882	5.2628	9.512	6.6128
587	AMP-binding protein [Synechococcus sp. PCC 7002]	gi|170078584	121 kDa	0	3.1957	0	0	0.9512	0.94469
588	hypothetical protein SYNPCC7002_A2635 [Synechococcus sp. PCC 7002]	gi|170079229	34 kDa	21.937	46.338	10.882	17.104	19.024	19.838
589	hypothetical protein SYNPCC7002_A2720 [Synechococcus sp. PCC 7002]	gi|170079312	45 kDa	19.012	11.984	10.882	18.42	11.414	11.336
590	acyltransferase domain-containing protein [Synechococcus sp. PCC 7002]	gi|170077722	46 kDa	2.9249	4.7936	4.1854	1.3157	4.756	2.8341
591	hypothetical protein SYNPCC7002_A1529 [Synechococcus sp. PCC 7002]	gi|170078138	15 kDa	13.162	11.984	8.3708	10.526	12.366	14.17
592	acetyl-CoA carboxylase biotin carboxylase subunit [Synechococcus sp. PCC 7002]	gi|170078726	49 kDa	7.3122	11.185	1.6742	1.3157	8.5608	8.5022
593	Type I N6 DNA methyltransferase [Synechococcus sp. PCC 7002]	gi|170079467	54 kDa	1.4624	0.79893	0	0	0.9512	3.7788
594	hypothetical protein SYNPCC7002_A0327 [Synechococcus sp. PCC 7002]	gi|170076955	60 kDa	5.8498	4.7936	0.83708	2.6314	9.512	8.5022
595	aspartate-semialdehyde dehydrogenase [Synechococcus sp. PCC 7002]	gi|170077890	37 kDa	16.087	14.381	15.905	31.577	18.073	18.894
596	ABC transporter ATPase [Synechococcus sp. PCC 7002]	gi|170079282	63 kDa	7.3122	3.1957	0.83708	2.6314	4.756	3.7788
597	NAD(P)H-dependent glycerol-3-phosphate dehydrogenase [Synechococcus sp. PCC 7002]	gi|170079438	36 kDa	8.7747	11.984	10.882	10.526	8.5608	8.5022
598	hypothetical protein SYNPCC7002_A2301 [Synechococcus sp. PCC 7002]	gi|170078896	38 kDa	21.937	3.1957	0	1.3157	2.8536	4.7234
599	hypothetical protein SYNPCC7002_A0959 [Synechococcus sp. PCC 7002]	gi|170077580	52 kDa	2.9249	4.7936	11.719	3.9471	2.8536	2.8341
600	1-(5-phosphoribosyl)-5-[(5-phosphoribosylamino)methylideneamino] imidazole-4-carboxamide isomerase [Synechococcus sp. PCC 7002]	gi|170078495	26 kDa	14.624	11.984	15.905	15.788	19.024	17.004
601	hypothetical protein SYNPCC7002_A2414 [Synechococcus sp. PCC 7002]	gi|170079009	39 kDa	4.3873	3.1957	2.5112	1.3157	0	0.94469
602	hypothetical protein SYNPCC7002_A0013 [Synechococcus sp. PCC 7002]	gi|170076649	50 kDa	0	3.9947	2.5112	0	0.9512	1.8894
603	hypothetical protein SYNPCC7002_A0042 [Synechococcus sp. PCC 7002]	gi|170076677	13 kDa	24.862	22.37	17.579	24.998	22.829	24.562
604	cyanophycinase [Synechococcus sp. PCC 7002]	gi|170079001	31 kDa	5.8498	5.5925	5.8596	10.526	4.756	10.392
605	photosystem II 11 kD protein [Synechococcus sp. PCC 7002]	gi|170079127	15 kDa	16.087	12.783	17.579	31.577	15.219	20.783
606	serine/threonine-protein kinase [Synechococcus sp. PCC 7002]	gi|170079327	57 kDa	7.3122	10.386	9.2079	6.5785	8.5608	9.4469
607	hypothetical protein SYNPCC7002_G0084 [Synechococcus sp. PCC 7002]	gi|170076554	20 kDa	17.549	20.772	21.764	6.5785	3.8048	3.7788
608	5,10-methylenetetrahydrofolate reductase [Synechococcus sp. PCC 7002]	gi|170076673	33 kDa	1.4624	3.1957	4.1854	3.9471	2.8536	2.8341
609	dihydroneopterin aldolase [Synechococcus sp. PCC 7002]	gi|170076935	13 kDa	8.7747	9.5872	49.388	7.8941	12.366	11.336
610	periplasmic solute-binding protein of ABC transporter [Synechococcus sp. PCC 7002]	gi|170077125	46 kDa	13.162	13.582	10.045	13.157	19.024	18.894
611	dehydrogenase subunit-like protein [Synechococcus sp. PCC 7002]	gi|170077347	55 kDa	10.237	11.984	5.0225	9.2098	14.268	11.336
612	sucrose-phosphate synthase [Synechococcus sp. PCC 7002]	gi|170077510	81 kDa	1.4624	5.5925	0.83708	0	5.7072	1.8894
613	hypothetical protein SYNPCC7002_A1335 [Synechococcus sp. PCC 7002]	gi|170077950	38 kDa	1.4624	6.3915	7.5337	3.9471	11.414	7.5575
614	putative nitrilase [Synechococcus sp. PCC 7002]	gi|170078616	30 kDa	8.7747	13.582	20.927	14.473	17.122	13.226
615	23S rRNA (uracil-5-)-methyltransferase RumA [Synechococcus sp. PCC 7002]	gi|170077182	50 kDa	7.3122	10.386	8.3708	10.526	16.17	15.115
616	histidinol dehydrogenase [Synechococcus sp. PCC 7002]	gi|170078653	47 kDa	16.087	17.577	12.556	14.473	10.463	13.226
617	cell envelope-related function transcriptional attenuator [Synechococcus sp. PCC 7002]	gi|170076990	52 kDa	0	2.3968	3.3483	1.3157	2.8536	0.94469
618	IucB family siderophore biosynthesis protein [Synechococcus sp. PCC 7002]	gi|170076492	23 kDa	0	3.1957	2.5112	1.3157	0.9512	0
619	aspartate carbamoyltransferase catalytic subunit [Synechococcus sp. PCC 7002]	gi|170077506	37 kDa	1.4624	3.1957	0.83708	0	0.9512	2.8341
620	hypothetical protein SYNPCC7002_A2531 [Synechococcus sp. PCC 7002]	gi|170079125	48 kDa	24.862	16.778	10.045	26.314	8.5608	24.562
621	malonyl CoA-acyl carrier protein transacylase [Synechococcus sp. PCC 7002]	gi|170079153	31 kDa	4.3873	4.7936	7.5337	7.8941	5.7072	5.6681
622	hypothetical protein SYNPCC7002_A2630 [Synechococcus sp. PCC 7002]	gi|170079224	22 kDa	17.549	14.381	15.067	23.682	20.926	14.17
623	hypothetical protein SYNPCC7002_A0236 [Synechococcus sp. PCC 7002]	gi|170076866	48 kDa	1.4624	3.9947	2.5112	1.3157	2.8536	0.94469
624	peroxiredoxin [Synechococcus sp. PCC 7002]	gi|170077997	21 kDa	13.162	19.973	15.905	10.526	18.073	16.06
625	30S ribosomal protein S10 [Synechococcus sp. PCC 7002]	gi|170078664	12 kDa	11.7	11.185	12.556	10.526	14.268	17.004
626	CobQ/CobB/MinD/ParA nucleotide binding domain-containing protein [Synechococcus sp. PCC 7002]	gi|170078836	36 kDa	1.4624	2.3968	4.1854	1.3157	1.9024	4.7234
627	photosystem II 12 kDa extrinsic protein (PsbU) [Synechococcus sp. PCC 7002]	gi|170076950	15 kDa	5.8498	13.582	18.416	11.841	15.219	21.728
628	hypothetical protein SYNPCC7002_A0778 [Synechococcus sp. PCC 7002]	gi|170077401	41 kDa	5.8498	0	2.5112	10.526	15.219	5.6681
629	hypothetical protein SYNPCC7002_A0190 [Synechococcus sp. PCC 7002]	gi|170076821	54 kDa	7.3122	5.5925	3.3483	11.841	7.6096	9.4469
630	two-component sensory transduction histidine kinase and response regulator [Synechococcus sp. PCC 7002]	gi|170077723	35 kDa	11.7	11.185	10.045	7.8941	10.463	11.336
631	anthranilate phosphoribosyltransferase [Synechococcus sp. PCC 7002]	gi|170078801	36 kDa	16.087	18.375	23.438	30.261	19.024	23.617
632	putative coenzyme F420 hydrogenase/dehydrogenase subunit beta [Synechococcus sp. PCC 7002]	gi|170079232	45 kDa	0	0	0	1.3157	1.9024	0.94469
633	hypothetical protein SYNPCC7002_F0035 [Synechococcus sp. PCC 7002]	gi|170079588	65 kDa	1.4624	2.3968	0.83708	0	1.9024	0
634	cation transport ATPase [Synechococcus sp. PCC 7002]	gi|170078265	97 kDa	1.4624	3.1957	0	0	0.9512	0
635	haloacid dehalogenase-like hydrolase [Synechococcus sp. PCC 7002]	gi|170077131	27 kDa	4.3873	8.7883	8.3708	6.5785	8.5608	9.4469
636	histidinol-phosphate aminotransferase [Synechococcus sp. PCC 7002]	gi|170077136	41 kDa	11.7	11.984	20.09	18.42	19.024	15.115
637	cyanoglobin [Synechococcus sp. PCC 7002]	gi|170078229	14 kDa	4.3873	7.9893	15.905	5.2628	7.6096	6.6128
638	dihydroorotase [Synechococcus sp. PCC 7002]	gi|170078698	39 kDa	5.8498	12.783	21.764	17.104	12.366	9.4469
639	succinate dehydrogenase flavoprotein subunit [Synechococcus sp. PCC 7002]	gi|170079163	64 kDa	2.9249	3.9947	2.5112	1.3157	2.8536	0.94469
640	hypothetical protein SYNPCC7002_A2583 [Synechococcus sp. PCC 7002]	gi|170079177	29 kDa	8.7747	15.18	20.09	10.526	11.414	16.06
641	6,7-dimethyl-8-ribityllumazine synthase [Synechococcus sp. PCC 7002]	gi|170076769	17 kDa	16.087	15.979	10.045	15.788	8.5608	15.115
642	septum site-determining protein, MinD [Synechococcus sp. PCC 7002]	gi|170077139	29 kDa	16.087	15.979	15.067	11.841	14.268	13.226
643	UDP-N-acetylmuramoylalanine--D-glutamate ligase [Synechococcus sp. PCC 7002]	gi|170077472	43 kDa	5.8498	3.1957	6.6966	3.9471	5.7072	3.7788
644	ribbon-helix-helix protein [Synechococcus sp. PCC 7002]	gi|170078833	38 kDa	19.012	13.582	17.579	23.682	15.219	19.838
645	methionine sulfoxide reductase A [Synechococcus sp. PCC 7002]	gi|170076846	24 kDa	13.162	16.778	22.601	1.3157	15.219	10.392
646	transglutaminase [Synechococcus sp. PCC 7002]	gi|170078713	89 kDa	5.8498	4.7936	0.83708	1.3157	2.8536	0.94469
647	recombination and DNA strand exchange inhibitor protein [Synechococcus sp. PCC 7002]	gi|170079175	88 kDa	1.4624	2.3968	0.83708	1.3157	1.9024	2.8341
648	hypothetical protein SYNPCC7002_A2645 [Synechococcus sp. PCC 7002]	gi|170079239	30 kDa	8.7747	13.582	14.23	15.788	13.317	15.115
649	cytochrome P450 [Synechococcus sp. PCC 7002]	gi|170076575	52 kDa	4.3873	1.5979	0	1.3157	0.9512	0.94469
650	ribosome-binding factor A [Synechococcus sp. PCC 7002]	gi|170076709	15 kDa	7.3122	9.5872	14.23	6.5785	8.5608	13.226
651	nicotinate-nucleotide pyrophosphorylase [Synechococcus sp. PCC 7002]	gi|170076994	31 kDa	4.3873	7.1904	11.719	11.841	6.6584	10.392
652	hypothetical protein SYNPCC7002_A0751 [Synechococcus sp. PCC 7002]	gi|170077374	12 kDa	14.624	12.783	17.579	22.367	19.975	21.728
653	aspartate ammonia-lyase [Synechococcus sp. PCC 7002]	gi|170078645	50 kDa	2.9249	7.1904	4.1854	1.3157	6.6584	1.8894
654	hypothetical protein SYNPCC7002_G0126 [Synechococcus sp. PCC 7002]	gi|170076596	22 kDa	17.549	10.386	6.6966	19.735	11.414	19.838
655	hypothetical protein SYNPCC7002_A0063 [Synechococcus sp. PCC 7002]	gi|170076698	115 kDa	4.3873	2.3968	0	0	1.9024	0
656	hypothetical protein SYNPCC7002_A0225 [Synechococcus sp. PCC 7002]	gi|170076855	16 kDa	17.549	10.386	11.719	14.473	15.219	16.06
657	hypothetical protein SYNPCC7002_A1467 [Synechococcus sp. PCC 7002]	gi|170078076	65 kDa	1.4624	3.1957	0	1.3157	1.9024	1.8894
658	SpoIID-like protein [Synechococcus sp. PCC 7002]	gi|170078246	59 kDa	8.7747	11.185	13.393	9.2098	5.7072	8.5022
659	hypothetical protein SYNPCC7002_A2859 [Synechococcus sp. PCC 7002]	gi|170079444	41 kDa	13.162	12.783	16.742	24.998	13.317	16.06
660	siderophore biosynthesis protein; N-monooxygenase [Synechococcus sp. PCC 7002]	gi|170076491	50 kDa	17.549	20.772	13.393	0	0	0
661	methionine-R-sulfoxide reductase [Synechococcus sp. PCC 7002]	gi|170077295	15 kDa	4.3873	11.984	12.556	5.2628	10.463	8.5022
662	UDP-glucose dehydrogenase [Synechococcus sp. PCC 7002]	gi|170078935	49 kDa	8.7747	5.5925	2.5112	2.6314	5.7072	4.7234
663	hypothetical protein SYNPCC7002_A1143 [Synechococcus sp. PCC 7002]	gi|170077761	17 kDa	17.549	19.174	18.416	15.788	21.878	24.562
664	glutathione synthetase [Synechococcus sp. PCC 7002]	gi|170077765	35 kDa	8.7747	9.5872	6.6966	1.3157	8.5608	4.7234
665	orotate phosphoribosyltransferase [Synechococcus sp. PCC 7002]	gi|170077823	21 kDa	20.474	17.577	21.764	15.788	21.878	17.949
666	hypothetical protein SYNPCC7002_A1333 [Synechococcus sp. PCC 7002]	gi|170077948	42 kDa	2.9249	3.1957	1.6742	1.3157	1.9024	2.8341
667	ribonucleoside-diphosphate reductase subunit beta [Synechococcus sp. PCC 7002]	gi|170077010	41 kDa	2.9249	4.7936	2.5112	9.2098	6.6584	6.6128
668	two-component hybrid sensory kinase; GAF domain [Synechococcus sp. PCC 7002]	gi|170077522	86 kDa	4.3873	11.185	4.1854	0	4.756	4.7234
669	cyclophilin type peptidyl-prolyl cis-trans isomerase [Synechococcus sp. PCC 7002]	gi|170078234	19 kDa	5.8498	12.783	13.393	10.526	6.6584	10.392
670	translation initiation factor IF-3 [Synechococcus sp. PCC 7002]	gi|170079295	21 kDa	8.7747	8.7883	8.3708	13.157	9.512	12.281
671	hypothetical protein SYNPCC7002_A0676 [Synechococcus sp. PCC 7002]	gi|170077299	17 kDa	17.549	11.984	26.787	21.051	15.219	17.949
672	HAD family phosphatase [Synechococcus sp. PCC 7002]	gi|170077737	21 kDa	8.7747	8.7883	6.6966	7.8941	4.756	5.6681
673	hypothetical protein SYNPCC7002_A1810 [Synechococcus sp. PCC 7002]	gi|170078416	30 kDa	2.9249	2.3968	1.6742	2.6314	2.8536	2.8341
674	cysteine desulfurase SufS; FeS assembly protein [Synechococcus sp. PCC 7002]	gi|170078417	46 kDa	11.7	11.984	17.579	9.2098	6.6584	10.392
675	ribosomal biogenesis GTPase [Synechococcus sp. PCC 7002]	gi|170076707	31 kDa	7.3122	5.5925	7.5337	9.2098	7.6096	13.226
676	hypothetical protein SYNPCC7002_A0168 [Synechococcus sp. PCC 7002]	gi|170076800	48 kDa	4.3873	7.9893	5.8596	1.3157	3.8048	4.7234
677	zeta-carotene desaturase [Synechococcus sp. PCC 7002]	gi|170077154	54 kDa	0	4.7936	0.83708	1.3157	1.9024	0.94469
678	FeS assembly protein SufD [Synechococcus sp. PCC 7002]	gi|170078418	49 kDa	5.8498	7.9893	2.5112	2.6314	6.6584	4.7234
679	ParA family partitioning protein [Synechococcus sp. PCC 7002]	gi|170076519	22 kDa	1.4624	1.5979	1.6742	0	3.8048	0.94469
680	50S ribosomal protein L4 [Synechococcus sp. PCC 7002]	gi|170077684	23 kDa	14.624	11.984	8.3708	15.788	14.268	17.004
681	UDP-N-acetylglucosamine 1-carboxyvinyltransferase [Synechococcus sp. PCC 7002]	gi|170077724	47 kDa	0	3.9947	5.0225	0	1.9024	3.7788
682	hypothetical protein SYNPCC7002_A2439 [Synechococcus sp. PCC 7002]	gi|170079034	25 kDa	13.162	17.577	19.253	18.42	13.317	10.392
683	branched-chain alpha-keto acid dehydrogenase subunit E2 [Synechococcus sp. PCC 7002]	gi|170076743	45 kDa	8.7747	13.582	10.045	5.2628	14.268	11.336
684	7TM-HD extracellular/intracellular domain-containing protein [Synechococcus sp. PCC 7002]	gi|170079004	86 kDa	5.8498	4.7936	0	1.3157	2.8536	0.94469
685	hypothetical protein SYNPCC7002_A2619 [Synechococcus sp. PCC 7002]	gi|170079213	26 kDa	16.087	10.386	10.882	13.157	14.268	12.281
686	hypothetical protein SYNPCC7002_F0003 [Synechococcus sp. PCC 7002]	gi|170079556	63 kDa	4.3873	0.79893	0.83708	0	0.9512	0
687	aspartate aminotransferase [Synechococcus sp. PCC 7002]	gi|170077137	42 kDa	8.7747	11.984	16.742	10.526	19.024	15.115
688	hydrophobe/amphiphile efflux-1 (HAE1) family protein [Synechococcus sp. PCC 7002]	gi|170077634	113 kDa	11.7	15.979	6.6966	1.3157	16.17	6.6128
689	50S ribosomal protein L3 [Synechococcus sp. PCC 7002]	gi|170077685	23 kDa	14.624	17.577	10.045	19.735	16.17	15.115
690	hypothetical protein SYNPCC7002_A1822 [Synechococcus sp. PCC 7002]	gi|170078428	23 kDa	4.3873	7.1904	6.6966	6.5785	7.6096	12.281
691	ferredoxin-thioredoxin reductase variable chain [Synechococcus sp. PCC 7002]	gi|170079106	8 kDa	11.7	10.386	16.742	49.996	12.366	11.336
692	photosystem I biogenesis protein btpA [Synechococcus sp. PCC 7002]	gi|170077596	30 kDa	7.3122	11.984	10.882	5.2628	10.463	14.17
693	50S ribosomal protein L13 [Synechococcus sp. PCC 7002]	gi|170077659	17 kDa	10.237	11.185	8.3708	18.42	12.366	13.226
694	peptidyl-prolyl cis-trans isomerase B [Synechococcus sp. PCC 7002]	gi|170077712	27 kDa	7.3122	7.1904	10.045	10.526	8.5608	14.17
695	hypothetical protein SYNPCC7002_A1367 [Synechococcus sp. PCC 7002]	gi|170077981	24 kDa	24.862	16.778	15.905	14.473	18.073	19.838
696	bacterioferritin comigratory protein [Synechococcus sp. PCC 7002]	gi|170077726	17 kDa	4.3873	6.3915	7.5337	3.9471	5.7072	5.6681
697	ABC transporter ATP-binding protein [Synechococcus sp. PCC 7002]	gi|170076798	37 kDa	2.9249	6.3915	1.6742	1.3157	2.8536	3.7788
698	thioredoxin reductase [Synechococcus sp. PCC 7002]	gi|170077414	32 kDa	4.3873	5.5925	8.3708	7.8941	9.512	9.4469
699	tyrosyl-tRNA synthetase [Synechococcus sp. PCC 7002]	gi|170078217	44 kDa	7.3122	7.9893	5.0225	5.2628	7.6096	7.5575
700	pentapeptide repeat-containing protein [Synechococcus sp. PCC 7002]	gi|170078854	30 kDa	10.237	10.386	11.719	10.526	13.317	7.5575
701	RND family efflux transporter MFP subunit [Synechococcus sp. PCC 7002]	gi|170079146	51 kDa	14.624	11.185	8.3708	11.841	12.366	10.392
702	phosphoribosylaminoimidazole synthetase [Synechococcus sp. PCC 7002]	gi|170076973	36 kDa	21.937	15.18	21.764	21.051	16.17	17.004
703	hypothetical protein SYNPCC7002_A0462 [Synechococcus sp. PCC 7002]	gi|170077088	42 kDa	4.3873	7.9893	3.3483	1.3157	3.8048	4.7234
704	50S ribosomal protein L7/L12 [Synechococcus sp. PCC 7002]	gi|170077647	13 kDa	11.7	13.582	15.067	18.42	15.219	21.728
705	carbamoyl phosphate synthase small subunit [Synechococcus sp. PCC 7002]	gi|170079100	42 kDa	7.3122	19.174	13.393	5.2628	16.17	14.17
706	MloB like protein [Synechococcus sp. PCC 7002]	gi|170079469	54 kDa	2.9249	3.1957	4.1854	0	2.8536	3.7788
707	molecular chaperone DnaK [Synechococcus sp. PCC 7002]	gi|170077317-DECOY	?	1.4624	0	0	2.6314	0	0
708	hypothetical protein SYNPCC7002_A2865 [Synechococcus sp. PCC 7002]	gi|170079450	52 kDa	0	1.5979	0	1.3157	0.9512	0
709	hypothetical protein SYNPCC7002_A0347 [Synechococcus sp. PCC 7002]	gi|170076975	17 kDa	13.162	15.18	17.579	10.526	17.122	18.894
710	putative esterase [Synechococcus sp. PCC 7002]	gi|170077491	31 kDa	1.4624	8.7883	10.045	5.2628	7.6096	9.4469
711	hypothetical protein SYNPCC7002_A0911 [Synechococcus sp. PCC 7002]	gi|170077533	39 kDa	2.9249	5.5925	1.6742	0	4.756	4.7234
712	NADPH-dependent FMN reductase family protein [Synechococcus sp. PCC 7002]	gi|170079064	20 kDa	1.4624	6.3915	4.1854	5.2628	7.6096	6.6128
713	carbon dioxide concentrating mechanism protein [Synechococcus sp. PCC 7002]	gi|170079207	12 kDa	10.237	17.577	13.393	30.261	15.219	16.06
714	NAD-dependent DNA ligase [Synechococcus sp. PCC 7002]	gi|170079241	75 kDa	0	1.5979	0	0	0	0
715	hypothetical protein SYNPCC7002_A0413 [Synechococcus sp. PCC 7002]	gi|170077041	35 kDa	0	1.5979	0	0	0	0
716	single-stranded DNA-binding protein [Synechococcus sp. PCC 7002]	gi|170076752	13 kDa	16.087	11.185	15.905	15.788	15.219	12.281
717	glycyl-tRNA synthetase subunit alpha [Synechococcus sp. PCC 7002]	gi|170077015	34 kDa	8.7747	9.5872	5.8596	3.9471	8.5608	5.6681
718	Zn-dependent peptidase [Synechococcus sp. PCC 7002]	gi|170077147	48 kDa	4.3873	4.7936	3.3483	2.6314	2.8536	3.7788
719	bifunctional pyrimidine regulatory protein PyrR/uracil phosphoribosyltransferase [Synechococcus sp. PCC 7002]	gi|170078299	20 kDa	4.3873	8.7883	16.742	5.2628	8.5608	10.392
720	ribonuclease III [Synechococcus sp. PCC 7002]	gi|170079136	28 kDa	4.3873	3.1957	3.3483	9.2098	10.463	9.4469
721	hypothetical protein SYNPCC7002_A0271 [Synechococcus sp. PCC 7002]	gi|170076899-DECOY	?	0	1.5979	0	0	0	0
722	transcriptional regulator [Synechococcus sp. PCC 7002]	gi|170077845	23 kDa	0	0.79893	0	0	0.9512	1.8894
723	glutamyl-tRNA reductase [Synechococcus sp. PCC 7002]	gi|170077917	48 kDa	5.8498	7.1904	2.5112	5.2628	5.7072	5.6681
724	hypothetical protein SYNPCC7002_A2175 [Synechococcus sp. PCC 7002]	gi|170078773	212 kDa	4.3873	0.79893	10.882	2.6314	3.8048	3.7788
725	DnaJ-like protein [Synechococcus sp. PCC 7002]	gi|170077246	34 kDa	0	3.1957	5.8596	1.3157	0.9512	2.8341
726	two-component hybrid sensor and regulator [Synechococcus sp. PCC 7002]	gi|170077312	87 kDa	1.4624	4.7936	0	1.3157	0.9512	0.94469
727	ABC transporter ATP-binding protein [Synechococcus sp. PCC 7002]	gi|170079425	32 kDa	2.9249	2.3968	2.5112	0	0.9512	3.7788
728	hypothetical protein SYNPCC7002_A0234 [Synechococcus sp. PCC 7002]	gi|170076864	67 kDa	4.3873	9.5872	21.764	1.3157	2.8536	5.6681
729	bifunctional phosphoribosyl-AMP cyclohydrolase/phosphoribosyl-ATP pyrophosphatase [Synechococcus sp. PCC 7002]	gi|170077113	24 kDa	2.9249	3.1957	7.5337	5.2628	9.512	6.6128
730	type II site-specific deoxyribonuclease [Synechococcus sp. PCC 7002]	gi|170077806	36 kDa	1.4624	2.3968	0	0	3.8048	4.7234
731	exopolyphosphatase [Synechococcus sp. PCC 7002]	gi|170078010	61 kDa	2.9249	2.3968	2.5112	2.6314	3.8048	3.7788
732	hypothetical protein SYNPCC7002_A1845 [Synechococcus sp. PCC 7002]	gi|170078451	10 kDa	32.174	16.778	20.09	19.735	22.829	17.949
733	hypothetical protein SYNPCC7002_G0035 [Synechococcus sp. PCC 7002]	gi|170076505	46 kDa	4.3873	3.1957	6.6966	7.8941	6.6584	7.5575
734	ATP synthase B chain (subunit I) [Synechococcus sp. PCC 7002]	gi|170077359	19 kDa	11.7	10.386	11.719	19.735	12.366	11.336
735	ATP synthase B chain (subunit II) [Synechococcus sp. PCC 7002]	gi|170077360	18 kDa	11.7	15.18	14.23	18.42	11.414	17.949
736	3-hydroxyacid dehydrogenase [Synechococcus sp. PCC 7002]	gi|170079400	31 kDa	4.3873	11.185	15.067	3.9471	6.6584	13.226
737	F0F1 ATP synthase subunit alpha [Synechococcus sp. PCC 7002]	gi|170077357-DECOY	?	0	0	0.83708	0	0	2.8341
738	serine/threonine protein kinase C [Synechococcus sp. PCC 7002]	gi|170077085	61 kDa	10.237	11.984	3.3483	5.2628	15.219	6.6128
739	putative glycerol-3-phosphate acyltransferase PlsX [Synechococcus sp. PCC 7002]	gi|170077151	39 kDa	8.7747	11.185	5.8596	5.2628	11.414	12.281
740	phycocyanin-associated phycobilisome rod-core linker polypeptide [Synechococcus sp. PCC 7002]	gi|170077262	28 kDa	10.237	5.5925	3.3483	9.2098	9.512	10.392
741	ribosomal protein S6 modification protein [Synechococcus sp. PCC 7002]	gi|170077307	33 kDa	1.4624	4.7936	1.6742	1.3157	3.8048	4.7234
742	sigma-70 factor [Synechococcus sp. PCC 7002]	gi|170077819	38 kDa	7.3122	4.7936	4.1854	1.3157	4.756	5.6681
743	hypothetical protein SYNPCC7002_A1983 [Synechococcus sp. PCC 7002]	gi|170078587	18 kDa	8.7747	8.7883	14.23	10.526	11.414	13.226
744	putative aluminum resistance protein [Synechococcus sp. PCC 7002]	gi|170078795	44 kDa	14.624	13.582	10.045	9.2098	19.024	13.226
745	adenine phosphoribosyltransferase [Synechococcus sp. PCC 7002]	gi|170079143	19 kDa	17.549	18.375	19.253	15.788	19.024	17.004
746	von Willebrand factor type A domain-containing protein [Synechococcus sp. PCC 7002]	gi|170079457	59 kDa	17.549	3.1957	4.1854	0	2.8536	1.8894
747	processing protease [Synechococcus sp. PCC 7002]	gi|170076717	47 kDa	11.7	10.386	5.0225	9.2098	8.5608	9.4469
748	anti-anti-sigma factor [Synechococcus sp. PCC 7002]	gi|170077011	13 kDa	19.012	23.169	15.905	13.157	19.024	20.783
749	hypothetical protein SYNPCC7002_A0050 [Synechococcus sp. PCC 7002]	gi|170076685	25 kDa	4.3873	5.5925	2.5112	3.9471	3.8048	3.7788
750	ABC-type didpeptide transport, periplasmic binding protein [Synechococcus sp. PCC 7002]	gi|170077021	60 kDa	8.7747	7.9893	6.6966	13.157	17.122	12.281
751	two-component response regulator [Synechococcus sp. PCC 7002]	gi|170077559	27 kDa	5.8498	6.3915	6.6966	5.2628	6.6584	5.6681
752	hypothetical protein SYNPCC7002_A1702 [Synechococcus sp. PCC 7002]	gi|170078309	22 kDa	2.9249	12.783	10.045	10.526	9.512	11.336
753	two-component response regulator [Synechococcus sp. PCC 7002]	gi|170078959	68 kDa	0	3.1957	0.83708	0	0.9512	0.94469
754	methanol dehydrogenase regulatory protein, MoxR-like ATPase [Synechococcus sp. PCC 7002]	gi|170078994	35 kDa	11.7	11.185	12.556	3.9471	9.512	9.4469
755	transglutaminase-like superfamily protein [Synechococcus sp. PCC 7002]	gi|170079085	64 kDa	10.237	7.9893	4.1854	6.5785	6.6584	1.8894
756	lipid-A-disaccharide synthase [Synechococcus sp. PCC 7002]	gi|170076703	43 kDa	7.3122	3.9947	1.6742	1.3157	5.7072	6.6128
757	hypothetical protein SYNPCC7002_A1231 [Synechococcus sp. PCC 7002]	gi|170077847	42 kDa	2.9249	9.5872	13.393	0	0.9512	0
758	lipoyl synthase [Synechococcus sp. PCC 7002]	gi|170077407	34 kDa	4.3873	3.1957	2.5112	2.6314	4.756	3.7788
759	Hsp33-like chaperonin [Synechococcus sp. PCC 7002]	gi|170077741	32 kDa	5.8498	4.7936	1.6742	2.6314	1.9024	0.94469
760	universal stress protein [Synechococcus sp. PCC 7002]	gi|170078196	15 kDa	13.162	9.5872	14.23	18.42	10.463	11.336
761	carotenoid cis-trans isomerase [Synechococcus sp. PCC 7002]	gi|170078497	57 kDa	10.237	11.185	2.5112	0	5.7072	2.8341
762	spermidine synthase [Synechococcus sp. PCC 7002]	gi|170078879	35 kDa	11.7	8.7883	9.2079	13.157	11.414	12.281
763	two-component response regulator [Synechococcus sp. PCC 7002]	gi|170079401	40 kDa	1.4624	4.7936	0.83708	1.3157	2.8536	2.8341
764	nicotinate phosphoribosyltransferase [Synechococcus sp. PCC 7002]	gi|170077133	49 kDa	0	0	1.6742	1.3157	2.8536	1.8894
765	branched chain amino acid ABC transporter ATP-binding protein [Synechococcus sp. PCC 7002]	gi|170077023	41 kDa	0	1.5979	0.83708	0	0	2.8341
766	ABC transporter ATP-binding protein [Synechococcus sp. PCC 7002]	gi|170076753	66 kDa	5.8498	11.984	1.6742	1.3157	5.7072	5.6681
767	hypothetical protein SYNPCC7002_A0239 [Synechococcus sp. PCC 7002]	gi|170076869	57 kDa	1.4624	6.3915	4.1854	3.9471	3.8048	4.7234
768	UDP-3-O-[3-hydroxymyristoyl] N-acetylglucosamine deacetylase [Synechococcus sp. PCC 7002]	gi|170076947	30 kDa	8.7747	7.9893	11.719	10.526	14.268	10.392
769	HEAT repeat-containing protein [Synechococcus sp. PCC 7002]	gi|170078021	27 kDa	10.237	8.7883	12.556	13.157	7.6096	10.392
770	hypothetical protein SYNPCC7002_A1114 [Synechococcus sp. PCC 7002]	gi|170077732	31 kDa	0	0.79893	2.5112	0	0	0.94469
771	hypothetical protein SYNPCC7002_A0420 [Synechococcus sp. PCC 7002]	gi|170077048	33 kDa	1.4624	3.9947	7.5337	6.5785	3.8048	2.8341
772	tryptophan synthase subunit alpha [Synechococcus sp. PCC 7002]	gi|170077187	28 kDa	10.237	15.18	15.905	15.788	18.073	16.06
773	curli production assembly/transport component CsgG subfamily protein [Synechococcus sp. PCC 7002]	gi|170079030	28 kDa	13.162	11.984	16.742	18.42	9.512	11.336
774	hypothetical protein SYNPCC7002_A2608 [Synechococcus sp. PCC 7002]	gi|170079202	30 kDa	7.3122	9.5872	15.905	3.9471	3.8048	2.8341
775	phosphohistidine phosphatase SixA [Synechococcus sp. PCC 7002]	gi|170079216	18 kDa	4.3873	5.5925	6.6966	6.5785	7.6096	10.392
776	ATP synthase F1, beta subunit [Synechococcus sp. PCC 7002]	gi|170076614	50 kDa	1.4624	1.5979	0.83708	1.3157	0.9512	0
777	hypothetical protein SYNPCC7002_A2336 [Synechococcus sp. PCC 7002]	gi|170078931	19 kDa	11.7	10.386	1.6742	3.9471	12.366	6.6128
778	beta-ketoacyl-ACP synthase [Synechococcus sp. PCC 7002]	gi|170077150	36 kDa	10.237	11.185	10.882	10.526	10.463	10.392
779	hypothetical protein SYNPCC7002_A0770 [Synechococcus sp. PCC 7002]	gi|170077393	17 kDa	7.3122	8.7883	20.927	19.735	12.366	12.281
780	Sua5/YciO/YrdC/YwlC family protein [Synechococcus sp. PCC 7002]	gi|170078316	25 kDa	10.237	10.386	11.719	18.42	14.268	17.004
781	pyrroline-5-carboxylate reductase [Synechococcus sp. PCC 7002]	gi|170078524	28 kDa	10.237	11.984	15.067	15.788	13.317	14.17
782	co-chaperonin GroES [Synechococcus sp. PCC 7002]	gi|170079052	11 kDa	11.7	15.979	25.949	10.526	16.17	17.949
783	hypothetical protein SYNPCC7002_A2707 [Synechococcus sp. PCC 7002]	gi|170079300	23 kDa	10.237	8.7883	7.5337	6.5785	7.6096	7.5575
784	hypothetical protein SYNPCC7002_A0702 [Synechococcus sp. PCC 7002]	gi|170077325	44 kDa	0	0.79893	4.1854	1.3157	4.756	7.5575
785	inositol monophosphatase family protein [Synechococcus sp. PCC 7002]	gi|170076669	31 kDa	8.7747	10.386	15.905	10.526	10.463	14.17
786	30S ribosomal protein S14 [Synechococcus sp. PCC 7002]	gi|170077019	12 kDa	8.7747	8.7883	7.5337	10.526	7.6096	8.5022
787	D-alanyl-alanine synthetase A [Synechococcus sp. PCC 7002]	gi|170078193	39 kDa	2.9249	4.7936	8.3708	1.3157	16.17	11.336
788	sensory box/GGDEF family protein [Synechococcus sp. PCC 7002]	gi|170078465	65 kDa	4.3873	7.9893	3.3483	0	1.9024	1.8894
789	elongation factor G [Synechococcus sp. PCC 7002]	gi|170078682	76 kDa	4.3873	7.9893	5.8596	2.6314	9.512	9.4469
790	hypothetical protein SYNPCC7002_A2136 [Synechococcus sp. PCC 7002]	gi|170078735	23 kDa	1.4624	3.9947	7.5337	1.3157	1.9024	4.7234
791	glucosylglycerol 3-phosphatase [Synechococcus sp. PCC 7002]	gi|170079427	46 kDa	1.4624	7.9893	9.2079	11.841	9.512	9.4469
792	light-independent protochlorophyllide reductase subunit B [Synechococcus sp. PCC 7002]	gi|170078260	57 kDa	0	3.1957	0	1.3157	2.8536	3.7788
793	acetylglutamate kinase [Synechococcus sp. PCC 7002]	gi|170079111	33 kDa	1.4624	4.7936	0	1.3157	3.8048	2.8341
794	beta-carotene desaturase [Synechococcus sp. PCC 7002]	gi|170077864	72 kDa	1.4624	3.9947	1.6742	0	2.8536	1.8894
795	photosystem I assembly protein Ycf3 [Synechococcus sp. PCC 7002]	gi|170078175	20 kDa	5.8498	7.9893	10.882	11.841	8.5608	10.392
796	FKBP-type peptidyl-prolyl cis-trans isomerase [Synechococcus sp. PCC 7002]	gi|170078591	18 kDa	10.237	11.185	13.393	15.788	16.17	17.004
797	glycogen synthase [Synechococcus sp. PCC 7002]	gi|170078724	57 kDa	4.3873	5.5925	3.3483	0	2.8536	3.7788
798	50S ribosomal protein L21 [Synechococcus sp. PCC 7002]	gi|170077115	13 kDa	5.8498	5.5925	5.8596	9.2098	7.6096	8.5022
799	ATP phosphoribosyltransferase catalytic subunit [Synechococcus sp. PCC 7002]	gi|170077244	23 kDa	2.9249	4.7936	4.1854	3.9471	5.7072	5.6681
800	hypothetical protein SYNPCC7002_A0987 [Synechococcus sp. PCC 7002]	gi|170077608	28 kDa	7.3122	8.7883	8.3708	11.841	7.6096	9.4469
801	ferrochelatase [Synechococcus sp. PCC 7002]	gi|170079183	44 kDa	14.624	8.7883	7.5337	6.5785	13.317	11.336
802	CheA like protein [Synechococcus sp. PCC 7002]	gi|170079192	102 kDa	4.3873	3.1957	0.83708	0	1.9024	1.8894
803	tRNA modifying enzyme MiaB-like protein [Synechococcus sp. PCC 7002]	gi|170077243	49 kDa	0	0	0.83708	1.3157	1.9024	2.8341
804	hypothetical protein SYNPCC7002_A0153 [Synechococcus sp. PCC 7002]	gi|170076785	10 kDa	10.237	17.577	17.579	7.8941	13.317	17.004
805	lactoylglutathione lyase [Synechococcus sp. PCC 7002]	gi|170076965	15 kDa	0	1.5979	3.3483	1.3157	1.9024	2.8341
806	small heat shock protein [Synechococcus sp. PCC 7002]	gi|170077277	18 kDa	7.3122	9.5872	6.6966	2.6314	2.8536	5.6681
807	molybdopterin biosynthesis protein [Synechococcus sp. PCC 7002]	gi|170077394	43 kDa	2.9249	3.1957	4.1854	6.5785	2.8536	3.7788
808	hypothetical protein SYNPCC7002_A0839 [Synechococcus sp. PCC 7002]	gi|170077461	27 kDa	8.7747	6.3915	10.045	5.2628	4.756	8.5022
809	ATPase of AAA+ class [Synechococcus sp. PCC 7002]	gi|170077843	49 kDa	8.7747	3.1957	4.1854	3.9471	5.7072	6.6128
810	ferric uptake regulator [Synechococcus sp. PCC 7002]	gi|170078257	20 kDa	0	2.3968	2.5112	5.2628	8.5608	7.5575
811	hypothetical protein SYNPCC7002_F0045 [Synechococcus sp. PCC 7002]	gi|170079598	15 kDa	1.4624	3.1957	3.3483	2.6314	5.7072	5.6681
812	hypothetical protein SYNPCC7002_F0046 [Synechococcus sp. PCC 7002]	gi|170079599	30 kDa	7.3122	10.386	10.045	11.841	10.463	11.336
813	two-component sensor histidine kinase [Synechococcus sp. PCC 7002]	gi|170078701	50 kDa	1.4624	1.5979	0	1.3157	0	0
814	hypothetical protein SYNPCC7002_A2659 [Synechococcus sp. PCC 7002]	gi|170079253	29 kDa	19.012	19.973	24.275	2.6314	2.8536	6.6128
815	ABC transporter [Synechococcus sp. PCC 7002]	gi|170077493	40 kDa	11.7	15.18	14.23	0	0	0
816	hypothetical protein SYNPCC7002_A1223 [Synechococcus sp. PCC 7002]	gi|170077839	19 kDa	0	2.3968	1.6742	0	0.9512	1.8894
817	cytochrome P450 [Synechococcus sp. PCC 7002]	gi|170076802	51 kDa	2.9249	2.3968	1.6742	0	2.8536	0.94469
818	metallo-beta-lactamase superfamily hydrolase [Synechococcus sp. PCC 7002]	gi|170077134	33 kDa	1.4624	2.3968	4.1854	3.9471	6.6584	5.6681
819	hypothetical protein SYNPCC7002_A1129 [Synechococcus sp. PCC 7002]	gi|170077747	43 kDa	1.4624	1.5979	0.83708	1.3157	0.9512	0.94469
820	bifunctional ornithine acetyltransferase/N-acetylglutamate synthase [Synechococcus sp. PCC 7002]	gi|170077748	43 kDa	5.8498	4.7936	5.8596	5.2628	4.756	5.6681
821	hypothetical protein SYNPCC7002_A1357 [Synechococcus sp. PCC 7002]	gi|170077971	20 kDa	4.3873	4.7936	5.8596	2.6314	2.8536	4.7234
822	putative protein serine/threonine phosphatase [Synechococcus sp. PCC 7002]	gi|170079294	74 kDa	5.8498	6.3915	4.1854	2.6314	3.8048	4.7234
823	hypothetical protein SYNPCC7002_G0157 [Synechococcus sp. PCC 7002]	gi|170076627	33 kDa	8.7747	12.783	9.2079	3.9471	12.366	8.5022
824	ATP phosphoribosyltransferase regulatory subunit [Synechococcus sp. PCC 7002]	gi|170077245	45 kDa	2.9249	5.5925	2.5112	3.9471	6.6584	6.6128
825	transciptional regulator [Synechococcus sp. PCC 7002]	gi|170077715	13 kDa	11.7	13.582	12.556	19.735	13.317	16.06
826	RND family efflux transporter MFP subunit [Synechococcus sp. PCC 7002]	gi|170078183	45 kDa	8.7747	14.381	14.23	11.841	15.219	14.17
827	uracil phosphoribosyltransferase [Synechococcus sp. PCC 7002]	gi|170078296	24 kDa	5.8498	3.9947	7.5337	7.8941	6.6584	6.6128
828	hydrogenase nickel incorporation protein HypB [Synechococcus sp. PCC 7002]	gi|170078354	26 kDa	4.3873	6.3915	11.719	7.8941	4.756	8.5022
829	MotA/TolQ/ExbB proton channel family protein [Synechococcus sp. PCC 7002]	gi|170076607	24 kDa	10.237	9.5872	8.3708	0	0.9512	1.8894
830	penicillin-binding protein 1B [Synechococcus sp. PCC 7002]	gi|170077001	70 kDa	4.3873	5.5925	2.5112	1.3157	2.8536	2.8341
831	dihydropteroate synthase [Synechococcus sp. PCC 7002]	gi|170077909	31 kDa	2.9249	6.3915	8.3708	3.9471	4.756	2.8341
832	dihydroorotate dehydrogenase 2 [Synechococcus sp. PCC 7002]	gi|170078051	38 kDa	2.9249	1.5979	1.6742	1.3157	4.756	3.7788
833	shikimate kinase [Synechococcus sp. PCC 7002]	gi|170079112	21 kDa	10.237	7.1904	8.3708	10.526	7.6096	9.4469
834	signal peptide peptidase SppA, 36K type [Synechococcus sp. PCC 7002]	gi|170079132	30 kDa	8.7747	4.7936	7.5337	7.8941	8.5608	7.5575
835	2,4-diaminobutyrate 4-transaminase [Synechococcus sp. PCC 7002]	gi|170076495	50 kDa	17.549	22.37	15.067	0	0	0
836	endoribonuclease L-PSP [Synechococcus sp. PCC 7002]	gi|170077241	14 kDa	7.3122	10.386	16.742	10.526	12.366	11.336
837	succinate dehydrogenase iron-sulfur protein subunit [Synechococcus sp. PCC 7002]	gi|3184554	37 kDa	0	1.5979	0	0	0.9512	0.94469
838	Type 3 multicopper oxidase [Synechococcus sp. PCC 7002]	gi|170078914	54 kDa	4.3873	1.5979	2.5112	0	0	0
839	hypothetical protein SYNPCC7002_A0904 [Synechococcus sp. PCC 7002]	gi|170077526	16 kDa	2.9249	7.9893	8.3708	7.8941	11.414	10.392
840	GDSL-like lipase/acylhydrolase domain-containing protein [Synechococcus sp. PCC 7002]	gi|170077593	51 kDa	7.3122	4.7936	4.1854	7.8941	7.6096	4.7234
841	indole-3-glycerol-phosphate synthase [Synechococcus sp. PCC 7002]	gi|170077962	33 kDa	4.3873	4.7936	7.5337	7.8941	10.463	8.5022
842	imidazole glycerol phosphate synthase subunit HisF [Synechococcus sp. PCC 7002]	gi|170078244	28 kDa	10.237	9.5872	14.23	10.526	13.317	10.392
843	hypothetical protein SYNPCC7002_A1571 [Synechococcus sp. PCC 7002]	gi|170078180	10 kDa	0	0.79893	3.3483	2.6314	1.9024	0
844	hypothetical protein SYNPCC7002_A1522 [Synechococcus sp. PCC 7002]	gi|170078131	17 kDa	7.3122	6.3915	8.3708	9.2098	4.756	8.5022
845	hypothetical protein SYNPCC7002_A1918 [Synechococcus sp. PCC 7002]	gi|170078523	22 kDa	8.7747	7.9893	14.23	13.157	11.414	10.392
846	hypothetical protein SYNPCC7002_A0752 [Synechococcus sp. PCC 7002]	gi|170077375	19 kDa	5.8498	3.1957	1.6742	10.526	2.8536	3.7788
847	hypothetical protein SYNPCC7002_A2686 [Synechococcus sp. PCC 7002]	gi|170079279	42 kDa	7.3122	7.9893	13.393	13.157	8.5608	8.5022
848	urease accessory protein, UreG [Synechococcus sp. PCC 7002]	gi|170078675	21 kDa	1.4624	11.185	9.2079	9.2098	9.512	10.392
849	large conductance mechanosensitive channel protein [Synechococcus sp. PCC 7002]	gi|170079057	16 kDa	10.237	9.5872	8.3708	6.5785	11.414	10.392
850	signal peptide peptidase SppA, 67K type [Synechococcus sp. PCC 7002]	gi|170077749	65 kDa	10.237	9.5872	7.5337	3.9471	7.6096	6.6128
851	hypothetical protein SYNPCC7002_A1557 [Synechococcus sp. PCC 7002]	gi|170078166	52 kDa	8.7747	11.984	17.579	13.157	13.317	16.06
852	riboflavin biosynthesis protein RibD [Synechococcus sp. PCC 7002]	gi|170078074	39 kDa	0	7.1904	10.045	0	2.8536	4.7234
853	hypothetical protein SYNPCC7002_A0782 [Synechococcus sp. PCC 7002]	gi|170077405	58 kDa	55.573	27.963	23.438	42.102	19.024	24.562
854	molybdenum cofactor biosynthesis protein B [Synechococcus sp. PCC 7002]	gi|170077190	18 kDa	0	0.79893	0	1.3157	0.9512	2.8341
855	TonB family protein [Synechococcus sp. PCC 7002]	gi|170076560	55 kDa	11.7	14.381	16.742	0	0	0
856	M48 family peptidase [Synechococcus sp. PCC 7002]	gi|170077176	36 kDa	4.3873	7.9893	3.3483	2.6314	2.8536	2.8341
857	alpha/beta fold family hydrolase [Synechococcus sp. PCC 7002]	gi|170078214	31 kDa	5.8498	5.5925	6.6966	3.9471	6.6584	5.6681
858	universal stress protein family protein [Synechococcus sp. PCC 7002]	gi|170079018	32 kDa	5.8498	9.5872	5.8596	7.8941	8.5608	7.5575
859	ferredoxin [Synechococcus sp. PCC 7002]	gi|170079117	15 kDa	0	3.9947	2.5112	0	4.756	4.7234
860	hypothetical protein SYNPCC7002_A0140 [Synechococcus sp. PCC 7002]	gi|170076772	15 kDa	5.8498	8.7883	8.3708	9.2098	19.975	19.838
861	hypothetical protein SYNPCC7002_A1899 [Synechococcus sp. PCC 7002]	gi|170078504	30 kDa	0	3.9947	4.1854	3.9471	4.756	5.6681
862	hypothetical protein SYNPCC7002_A2165 [Synechococcus sp. PCC 7002]	gi|170078763	24 kDa	0	2.3968	3.3483	0	0	0
863	ABC transporter, periplasmic iron-binding lipoprotein [Synechococcus sp. PCC 7002]	gi|170076553	32 kDa	20.474	23.968	26.787	0	0	0
864	hypothetical protein SYNPCC7002_A1365 [Synechococcus sp. PCC 7002]	gi|170077979	25 kDa	14.624	11.984	12.556	9.2098	10.463	11.336
865	hypothetical protein SYNPCC7002_A2673 [Synechococcus sp. PCC 7002]	gi|170079266	18 kDa	5.8498	5.5925	9.2079	13.157	9.512	10.392
866	adaptive-response sensory kinase [Synechococcus sp. PCC 7002]	gi|170079404	45 kDa	1.4624	3.9947	2.5112	0	0.9512	1.8894
867	preprotein translocase subunit SecY [Synechococcus sp. PCC 7002]	gi|170077667	47 kDa	2.9249	9.5872	2.5112	2.6314	7.6096	3.7788
868	hypothetical protein SYNPCC7002_A2244 [Synechococcus sp. PCC 7002]	gi|170078840	12 kDa	1.4624	0.79893	2.5112	0	0	0.94469
869	glycoside hydrolase family protein [Synechococcus sp. PCC 7002]	gi|170079069	41 kDa	1.4624	3.1957	0	0	1.9024	0.94469
870	quinolinate synthetase complex subunit A [Synechococcus sp. PCC 7002]	gi|170078573	35 kDa	1.4624	8.7883	10.045	2.6314	11.414	11.336
871	RecName: Full=Iron stress-induced chlorophyll-binding protein; AltName: Full=CP43'	gi|400071	38 kDa	16.087	12.783	9.2079	0	0	0
872	fructose-bisphosphate aldolase [Synechococcus sp. PCC 7002]	gi|170076646	39 kDa	8.7747	8.7883	5.0225	2.6314	5.7072	6.6128
873	hypothetical protein SYNPCC7002_A0189 [Synechococcus sp. PCC 7002]	gi|170076820	54 kDa	2.9249	2.3968	1.6742	2.6314	5.7072	2.8341
874	6-phosphogluconolactonase [Synechococcus sp. PCC 7002]	gi|170077550	28 kDa	7.3122	11.984	13.393	5.2628	5.7072	10.392
875	two-component system response regulator [Synechococcus sp. PCC 7002]	gi|170077988	15 kDa	8.7747	11.984	15.067	6.5785	6.6584	9.4469
876	lignostilbene-alpha,beta-dioxygenase [Synechococcus sp. PCC 7002]	gi|170078034	55 kDa	0	3.1957	1.6742	0	1.9024	0
877	Clp protease [Synechococcus sp. PCC 7002]	gi|170078144	21 kDa	7.3122	10.386	11.719	10.526	11.414	9.4469
878	hypothetical protein SYNPCC7002_A2053 [Synechococcus sp. PCC 7002]	gi|170078657	21 kDa	4.3873	6.3915	9.2079	7.8941	8.5608	8.5022
879	urease subunit gamma [Synechococcus sp. PCC 7002]	gi|170077934	11 kDa	1.4624	3.1957	5.0225	6.5785	2.8536	0.94469
880	SAM-dependent methyltransferase [Synechococcus sp. PCC 7002]	gi|170078073	44 kDa	0	7.1904	4.1854	2.6314	3.8048	1.8894
881	bifunctional sterol desaturase/short chain dehydrogenase [Synechococcus sp. PCC 7002]	gi|170079114	46 kDa	1.4624	1.5979	0	0	1.9024	1.8894
882	Ser/Thr protein phosphatase family protein family [Synechococcus sp. PCC 7002]	gi|170076699	53 kDa	14.624	11.984	24.275	9.2098	3.8048	4.7234
883	fimbrial assembly protein (PilN) family protein [Synechococcus sp. PCC 7002]	gi|170077127	27 kDa	14.624	10.386	15.905	14.473	11.414	12.281
884	hypothetical protein SYNPCC7002_A2617 [Synechococcus sp. PCC 7002]	gi|170079211	50 kDa	1.4624	4.7936	3.3483	1.3157	4.756	2.8341
885	N-acyl-L-amino acid amidohydrolase [Synechococcus sp. PCC 7002]	gi|170079350	44 kDa	5.8498	5.5925	3.3483	0	3.8048	2.8341
886	hypothetical protein SYNPCC7002_A0222 [Synechococcus sp. PCC 7002]	gi|170076853	48 kDa	1.4624	3.9947	2.5112	0	2.8536	2.8341
887	biotin synthase [Synechococcus sp. PCC 7002]	gi|170076937	40 kDa	1.4624	0.79893	0.83708	0	4.756	1.8894
888	50S ribosomal protein L28 [Synechococcus sp. PCC 7002]	gi|170077468	9 kDa	5.8498	5.5925	5.8596	6.5785	9.512	9.4469
889	putative inner membrane protein translocase component YidC [Synechococcus sp. PCC 7002]	gi|170077612	43 kDa	2.9249	8.7883	4.1854	2.6314	14.268	10.392
890	hypothetical protein SYNPCC7002_A1542 [Synechococcus sp. PCC 7002]	gi|170078151	24 kDa	10.237	5.5925	10.045	10.526	10.463	8.5022
891	ABC transporter ATP-binding protein [Synechococcus sp. PCC 7002]	gi|170079313	29 kDa	0	3.9947	1.6742	1.3157	1.9024	0.94469
892	sphingomyelinase-c [Synechococcus sp. PCC 7002]	gi|170079433	34 kDa	0	0.79893	4.1854	0	0	0
893	hydrogenase large subunit H [Synechococcus sp. PCC 7002]	gi|170076831	53 kDa	0	1.5979	0.83708	1.3157	0.9512	0.94469
894	ABC-type transport protein [Synechococcus sp. PCC 7002]	gi|170077328	37 kDa	8.7747	7.9893	5.0225	1.3157	7.6096	9.4469
895	thiosulfate sulfurtransferase [Synechococcus sp. PCC 7002]	gi|170077529	49 kDa	7.3122	3.9947	6.6966	3.9471	4.756	4.7234
896	serine proteinase [Synechococcus sp. PCC 7002]	gi|170077993	63 kDa	4.3873	2.3968	0.83708	0	0	0.94469
897	sensory box protein [Synechococcus sp. PCC 7002]	gi|170079181	97 kDa	2.9249	0.79893	0.83708	0	2.8536	0.94469
898	photosystem I P700 chlorophyll a apoprotein A1 [Synechococcus sp. PCC 7002]	gi|170078566	81 kDa	11.7	3.1957	4.1854	6.5785	10.463	13.226
899	peptidoglycan binding protein [Synechococcus sp. PCC 7002]	gi|170076716	24 kDa	4.3873	7.1904	9.2079	7.8941	7.6096	10.392
900	two component response regulator [Synechococcus sp. PCC 7002]	gi|170076680	44 kDa	4.3873	10.386	1.6742	1.3157	7.6096	8.5022
901	proline iminopeptidase [Synechococcus sp. PCC 7002]	gi|170077521	36 kDa	5.8498	1.5979	5.8596	2.6314	6.6584	5.6681
902	phycocyanin alpha subunit phycocyanobilin lyase, CpcF [Synechococcus sp. PCC 7002]	gi|170078812	23 kDa	5.8498	3.9947	6.6966	14.473	8.5608	9.4469
903	ATP synthase F1 subunit epsilon [Synechococcus sp. PCC 7002]	gi|170077373	14 kDa	10.237	7.1904	12.556	23.682	7.6096	7.5575
904	hypothetical protein SYNPCC7002_A0014 [Synechococcus sp. PCC 7002]	gi|170076650	28 kDa	11.7	6.3915	13.393	7.8941	10.463	9.4469
905	lycopene cyclase CruP [Synechococcus sp. PCC 7002]	gi|170076678	58 kDa	4.3873	5.5925	2.5112	0	4.756	3.7788
906	hypothetical protein SYNPCC7002_A0315 [Synechococcus sp. PCC 7002]	gi|170076943	24 kDa	7.3122	7.1904	5.0225	6.5785	10.463	8.5022
907	4-hydroxythreonine-4-phosphate dehydrogenase [Synechococcus sp. PCC 7002]	gi|170077294	39 kDa	1.4624	3.1957	4.1854	1.3157	2.8536	4.7234
908	polysaccharide export periplasmic protein [Synechococcus sp. PCC 7002]	gi|170078110	46 kDa	10.237	11.984	16.742	6.5785	9.512	14.17
909	ribonuclease H [Synechococcus sp. PCC 7002]	gi|170078313	33 kDa	4.3873	3.9947	5.0225	3.9471	3.8048	6.6128
910	hypothetical protein SYNPCC7002_A2344 [Synechococcus sp. PCC 7002]	gi|170078939	48 kDa	2.9249	8.7883	18.416	9.2098	7.6096	6.6128
911	heterodisulfide reductase subunit B [Synechococcus sp. PCC 7002]	gi|170077457	33 kDa	0	2.3968	0.83708	1.3157	1.9024	0.94469
912	sensory box protein/response regulator [Synechococcus sp. PCC 7002]	gi|170077561	65 kDa	1.4624	3.1957	0.83708	0	1.9024	0
913	anion ABC transporter ATPase [Synechococcus sp. PCC 7002]	gi|170077619	40 kDa	5.8498	7.9893	7.5337	2.6314	6.6584	5.6681
914	hypothetical protein SYNPCC7002_A1663 [Synechococcus sp. PCC 7002]	gi|170078270	28 kDa	5.8498	4.7936	8.3708	18.42	8.5608	8.5022
915	fibrillin [Synechococcus sp. PCC 7002]	gi|170078387	22 kDa	8.7747	3.1957	5.8596	5.2628	5.7072	5.6681
916	phosphoglucosamine mutase [Synechococcus sp. PCC 7002]	gi|170077076	52 kDa	0	1.5979	0.83708	0	0.9512	0
917	3-hydroxyisobutyrate dehydrogenase [Synechococcus sp. PCC 7002]	gi|170078167	31 kDa	0	4.7936	5.8596	0	1.9024	2.8341
918	hypothetical protein SYNPCC7002_A0093 [Synechococcus sp. PCC 7002]	gi|170076727	15 kDa	7.3122	9.5872	13.393	3.9471	8.5608	10.392
919	ribosomal RNA small subunit methyltransferase B (rRNA (cytosine-C(5)-)-methyltransferase) [Synechococcus sp. PCC 7002]	gi|170077132	50 kDa	4.3873	2.3968	2.5112	1.3157	4.756	2.8341
920	methionine aminopeptidase [Synechococcus sp. PCC 7002]	gi|170077892	26 kDa	1.4624	8.7883	9.2079	9.2098	4.756	11.336
921	hypothetical protein SYNPCC7002_A1647 [Synechococcus sp. PCC 7002]	gi|170078255	18 kDa	11.7	7.9893	10.045	7.8941	8.5608	7.5575
922	putative gamma-tocopherol methyltransferase [Synechococcus sp. PCC 7002]	gi|170078397	32 kDa	5.8498	8.7883	7.5337	6.5785	5.7072	9.4469
923	queuine tRNA-ribosyltransferase [Synechococcus sp. PCC 7002]	gi|170079371	43 kDa	2.9249	2.3968	1.6742	1.3157	0.9512	1.8894
924	peptide chain release factor 2 [Synechococcus sp. PCC 7002]	gi|170076819	40 kDa	1.4624	3.9947	0.83708	0	1.9024	3.7788
925	RNA-binding protein [Synechococcus sp. PCC 7002]	gi|170077613	18 kDa	4.3873	7.9893	12.556	7.8941	9.512	11.336
926	hypothetical protein SYNPCC7002_F0069 [Synechococcus sp. PCC 7002]	gi|170079622	28 kDa	0	1.5979	3.3483	0	0	0
927	carbonic anhydrase [Synechococcus sp. PCC 7002]	gi|170078601	28 kDa	10.237	11.984	12.556	10.526	12.366	11.336
928	NlpC/P60 family protein [Synechococcus sp. PCC 7002]	gi|170078782	26 kDa	1.4624	3.1957	5.8596	3.9471	0.9512	1.8894
929	phycocyanin alpha subunit phycocyanobilin lyase, CpcE [Synechococcus sp. PCC 7002]	gi|170078811	29 kDa	7.3122	7.1904	9.2079	9.2098	12.366	9.4469
930	hypothetical protein SYNPCC7002_A2412 [Synechococcus sp. PCC 7002]	gi|170079007	64 kDa	1.4624	3.9947	1.6742	2.6314	2.8536	2.8341
931	hypothetical protein SYNPCC7002_A2426 [Synechococcus sp. PCC 7002]	gi|170079021	43 kDa	7.3122	6.3915	14.23	7.8941	6.6584	7.5575
932	agmatinase [Synechococcus sp. PCC 7002]	gi|170077727	33 kDa	5.8498	6.3915	7.5337	2.6314	8.5608	7.5575
933	putative haloacid dehalogenase-like hydrolase [Synechococcus sp. PCC 7002]	gi|170078752	26 kDa	4.3873	5.5925	7.5337	7.8941	7.6096	7.5575
934	pentapeptide repeat-containing protein [Synechococcus sp. PCC 7002]	gi|170077836	35 kDa	4.3873	7.1904	3.3483	1.3157	5.7072	2.8341
935	methionyl-tRNA formyltransferase [Synechococcus sp. PCC 7002]	gi|170078261	36 kDa	2.9249	2.3968	6.6966	2.6314	2.8536	4.7234
936	delta-9 acyl-lipid desaturase [Synechococcus sp. PCC 7002]	gi|170078796	36 kDa	0	1.5979	0	0	0	0
937	hypothetical protein SYNPCC7002_A0180 [Synechococcus sp. PCC 7002]	gi|170076812	20 kDa	10.237	7.9893	8.3708	13.157	5.7072	8.5022
938	hypothetical protein SYNPCC7002_A1341 [Synechococcus sp. PCC 7002]	gi|170077955	48 kDa	5.8498	7.9893	3.3483	2.6314	11.414	8.5022
939	UDP-glucose 4-epimerase [Synechococcus sp. PCC 7002]	gi|170078322	36 kDa	5.8498	7.1904	5.8596	3.9471	5.7072	4.7234
940	CbbY family protein [Synechococcus sp. PCC 7002]	gi|170078558	28 kDa	8.7747	11.185	12.556	13.157	12.366	14.17
941	Rieske (2Fe-2S) domain-containing protein [Synechococcus sp. PCC 7002]	gi|170078842	42 kDa	0	1.5979	0	0	0.9512	0
942	TrkA domain-containing protein [Synechococcus sp. PCC 7002]	gi|170078863	26 kDa	2.9249	3.9947	2.5112	1.3157	3.8048	3.7788
943	alpha/beta hydrolase [Synechococcus sp. PCC 7002]	gi|170079296	34 kDa	2.9249	1.5979	0.83708	0	0.9512	0.94469
944	thioredoxin family protein [Synechococcus sp. PCC 7002]	gi|170076921	12 kDa	14.624	10.386	13.393	21.051	14.268	14.17
945	amino acid permease [Synechococcus sp. PCC 7002]	gi|170078568	76 kDa	2.9249	4.7936	1.6742	0	1.9024	1.8894
946	hypothetical protein SYNPCC7002_A0516 [Synechococcus sp. PCC 7002]	gi|170077141	33 kDa	0	11.984	9.2079	2.6314	12.366	11.336
947	L-2,4-diaminobutyrate decarboxylase [Synechococcus sp. PCC 7002]	gi|170076494	49 kDa	16.087	14.381	15.905	0	0	0
948	geranylgeranyl pyrophosphate synthase [Synechococcus sp. PCC 7002]	gi|170077705	32 kDa	8.7747	5.5925	10.045	9.2098	7.6096	8.5022
949	glycoside hydrolase family protein [Synechococcus sp. PCC 7002]	gi|170078223	45 kDa	1.4624	1.5979	1.6742	1.3157	1.9024	1.8894
950	putative zinc-binding oxidoreductase [Synechococcus sp. PCC 7002]	gi|170078788	35 kDa	5.8498	12.783	12.556	9.2098	13.317	9.4469
951	hypothetical protein SYNPCC7002_A0044 [Synechococcus sp. PCC 7002]	gi|170076679	26 kDa	0	2.3968	0.83708	0	0.9512	1.8894
952	hypothetical protein SYNPCC7002_A1916 [Synechococcus sp. PCC 7002]	gi|170078521	11 kDa	0	3.1957	4.1854	2.6314	2.8536	1.8894
953	ATP synthase F1, alpha subunit [Synechococcus sp. PCC 7002]	gi|170076621	56 kDa	4.3873	3.9947	0	1.3157	2.8536	1.8894
954	ParB family chromosome partitioning protein [Synechococcus sp. PCC 7002]	gi|170077061	29 kDa	2.9249	5.5925	4.1854	2.6314	4.756	5.6681
955	putative cyanate ABC transporter substrate binding protein [Synechococcus sp. PCC 7002]	gi|170077482	59 kDa	1.4624	3.9947	4.1854	0	2.8536	3.7788
956	sugar-specific transcriptional regulator, TrmB [Synechococcus sp. PCC 7002]	gi|170078421	26 kDa	1.4624	2.3968	3.3483	2.6314	0.9512	2.8341
957	bifunctional N-acetylglucosamine-1-phosphate uridyltransferase/glucosamine-1-phosphate acetyltransferase [Synechococcus sp. PCC 7002]	gi|170079227	49 kDa	1.4624	5.5925	0.83708	0	6.6584	2.8341
958	putative ATP-dependent proteinase [Synechococcus sp. PCC 7002]	gi|170078663	24 kDa	1.4624	1.5979	1.6742	1.3157	2.8536	1.8894
959	hypothetical protein SYNPCC7002_A0454 [Synechococcus sp. PCC 7002]	gi|170077080	66 kDa	4.3873	3.1957	0	1.3157	0	0
960	hypothetical protein SYNPCC7002_A0503 [Synechococcus sp. PCC 7002]	gi|170077128	30 kDa	10.237	13.582	13.393	7.8941	10.463	10.392
961	hypothetical protein SYNPCC7002_A0806 [Synechococcus sp. PCC 7002]	gi|170077428	61 kDa	11.7	4.7936	3.3483	5.2628	9.512	6.6128
962	6-pyruvoyl-tetrahydropterin synthase [Synechococcus sp. PCC 7002]	gi|170077083	15 kDa	0	3.1957	6.6966	0	1.9024	3.7788
963	iron compound TonB-dependent receptor [Synechococcus sp. PCC 7002]	gi|170077260	73 kDa	1.4624	0.79893	0.83708	0	1.9024	3.7788
964	ribonuclease PH [Synechococcus sp. PCC 7002]	gi|170078680	26 kDa	7.3122	4.7936	1.6742	3.9471	9.512	9.4469
965	4-diphosphocytidyl-2-C-methyl-D-erythritol kinase [Synechococcus sp. PCC 7002]	gi|170079011	34 kDa	5.8498	7.1904	10.882	9.2098	7.6096	9.4469
966	glucokinase [Synechococcus sp. PCC 7002]	gi|170079033	31 kDa	4.3873	8.7883	20.09	7.8941	8.5608	9.4469
967	acetyltransferase [Synechococcus sp. PCC 7002]	gi|170077569	45 kDa	0	1.5979	0	0	0	0.94469
968	methyltransferase [Synechococcus sp. PCC 7002]	gi|170078454	30 kDa	0	2.3968	3.3483	1.3157	1.9024	3.7788
969	periplasmic solute-binding protein of ABC transporter [Synechococcus sp. PCC 7002]	gi|170076638	34 kDa	13.162	11.984	11.719	10.526	12.366	10.392
970	S-adenosylmethionine--tRNA ribosyltransferase-isomerase [Synechococcus sp. PCC 7002]	gi|170077817	40 kDa	5.8498	3.9947	7.5337	5.2628	5.7072	5.6681
971	ABC transporter substrate-binding protein [Synechococcus sp. PCC 7002]	gi|170078642	47 kDa	5.8498	7.1904	8.3708	3.9471	6.6584	8.5022
972	hypothetical protein SYNPCC7002_A1480 [Synechococcus sp. PCC 7002]	gi|170078089	43 kDa	14.624	6.3915	16.742	2.6314	7.6096	10.392
973	ferredoxin [Synechococcus sp. PCC 7002]	gi|170079268	20 kDa	1.4624	2.3968	5.0225	1.3157	2.8536	4.7234
974	two-component hybrid sensor and regulator [Synechococcus sp. PCC 7002]	gi|170078157	43 kDa	1.4624	3.1957	0	0	1.9024	0
975	hypothetical protein SYNPCC7002_A0015 [Synechococcus sp. PCC 7002]	gi|170076651	30 kDa	1.4624	0	2.5112	0	0	0.94469
976	transcriptional regulator NrdR [Synechococcus sp. PCC 7002]	gi|170077577	21 kDa	2.9249	3.1957	0.83708	0	1.9024	1.8894
977	hypothetical protein SYNPCC7002_A1282 [Synechococcus sp. PCC 7002]	gi|170077897	31 kDa	2.9249	3.9947	4.1854	3.9471	3.8048	4.7234
978	NifU-like protein [Synechococcus sp. PCC 7002]	gi|170078022	9 kDa	5.8498	6.3915	10.882	7.8941	8.5608	11.336
979	pathogenesis-related protein pr-1 [Synechococcus sp. PCC 7002]	gi|170077595	36 kDa	1.4624	0	2.5112	0	0	0
980	two-component hybrid sensor and regulator [Synechococcus sp. PCC 7002]	gi|170078249	47 kDa	1.4624	3.1957	0	0	1.9024	0
981	50S ribosomal protein L27 [Synechococcus sp. PCC 7002]	gi|170077114	10 kDa	10.237	7.1904	10.882	17.104	10.463	10.392
982	50S ribosomal protein L11 methyltransferase [Synechococcus sp. PCC 7002]	gi|170077863	33 kDa	7.3122	5.5925	9.2079	7.8941	6.6584	6.6128
983	hypothetical protein SYNPCC7002_A1340 [Synechococcus sp. PCC 7002]	gi|170077954	24 kDa	11.7	4.7936	6.6966	7.8941	4.756	7.5575
984	hypothetical protein SYNPCC7002_A1922 [Synechococcus sp. PCC 7002]	gi|170078527	64 kDa	5.8498	10.386	14.23	7.8941	10.463	13.226
985	dithiobiotin synthetase [Synechococcus sp. PCC 7002]	gi|170079319	26 kDa	11.7	8.7883	10.882	11.841	10.463	13.226
986	hypothetical protein SYNPCC7002_A2055 [Synechococcus sp. PCC 7002]	gi|170078659	22 kDa	7.3122	4.7936	10.882	6.5785	4.756	3.7788
987	DNA repair protein RecN [Synechococcus sp. PCC 7002]	gi|170077077	65 kDa	1.4624	1.5979	0.83708	0	0.9512	0.94469
988	two-component response regulator [Synechococcus sp. PCC 7002]	gi|170076681	13 kDa	2.9249	8.7883	5.8596	13.157	9.512	7.5575
989	putative alpha-isopropylmalate/homocitrate synthase family transferase [Synechococcus sp. PCC 7002]	gi|170077353	59 kDa	1.4624	2.3968	0	0	0	0
990	serine/threonine kinase [Synechococcus sp. PCC 7002]	gi|170077492	52 kDa	4.3873	3.9947	0.83708	1.3157	2.8536	0
991	outer membrane protein [Synechococcus sp. PCC 7002]	gi|170076481	62 kDa	0	0.79893	0	0	0	1.8894
992	glyceraldehyde-3-phosphate dehydrogenase, type I [Synechococcus sp. PCC 7002]	gi|170079290	38 kDa	7.3122	3.9947	0.83708	0	2.8536	0
993	phosphoribosylaminoimidazole carboxylase ATPase subunit [Synechococcus sp. PCC 7002]	gi|170077231	42 kDa	0	2.3968	4.1854	6.5785	2.8536	2.8341
994	signal transduction protein [Synechococcus sp. PCC 7002]	gi|170077007	21 kDa	2.9249	4.7936	5.0225	2.6314	4.756	6.6128
995	50S ribosomal protein L22 [Synechococcus sp. PCC 7002]	gi|170077680	13 kDa	10.237	9.5872	9.2079	11.841	8.5608	11.336
996	putative pleiotropic regulatory protein [Synechococcus sp. PCC 7002]	gi|170078571	40 kDa	2.9249	8.7883	10.045	5.2628	9.512	7.5575
997	sugar fermentation stimulation protein A [Synechococcus sp. PCC 7002]	gi|170078391	28 kDa	1.4624	1.5979	2.5112	1.3157	1.9024	1.8894
998	type II NADH dehydrogenase A [Synechococcus sp. PCC 7002]	gi|170078906	51 kDa	0	1.5979	0	0	0.9512	0.94469
999	ferripyochelin binding protein [Synechococcus sp. PCC 7002]	gi|170079091	20 kDa	2.9249	2.3968	2.5112	2.6314	2.8536	2.8341
1000	phosphoribosylaminoimidazole carboxylase catalytic subunit [Synechococcus sp. PCC 7002]	gi|170079412	18 kDa	1.4624	7.1904	9.2079	6.5785	10.463	9.4469
1001	GTPase ObgE [Synechococcus sp. PCC 7002]	gi|170078130	38 kDa	1.4624	3.9947	3.3483	0	0.9512	5.6681
1002	arginine decarboxylase [Synechococcus sp. PCC 7002]	gi|170078414	73 kDa	0	1.5979	0	0	0	0
1003	two-component hybrid sensor and regulator [Synechococcus sp. PCC 7002]	gi|170077489	86 kDa	1.4624	2.3968	0	0	0.9512	0
1004	exodeoxyribonuclease III [Synechococcus sp. PCC 7002]	gi|170077908	26 kDa	0	3.1957	5.8596	0	1.9024	1.8894
1005	ThiS domain-containing protein [Synechococcus sp. PCC 7002]	gi|170076913	10 kDa	2.9249	5.5925	2.5112	3.9471	6.6584	6.6128
1006	hypothetical protein SYNPCC7002_A2056 [Synechococcus sp. PCC 7002]	gi|170078660	35 kDa	5.8498	8.7883	6.6966	2.6314	4.756	3.7788
1007	PilT domain-containing protein [Synechococcus sp. PCC 7002]	gi|170076523	15 kDa	1.4624	1.5979	3.3483	2.6314	1.9024	1.8894
1008	phosphoadenosine phosphosulfate reductase [Synechococcus sp. PCC 7002]	gi|170078106	28 kDa	1.4624	3.1957	0.83708	2.6314	1.9024	1.8894
1009	hypothetical protein SYNPCC7002_A0653 [Synechococcus sp. PCC 7002]	gi|170077276	52 kDa	0	1.5979	0	1.3157	0.9512	0
1010	hypothetical protein SYNPCC7002_A1191 [Synechococcus sp. PCC 7002]	gi|170077808	39 kDa	0	0.79893	0	0	1.9024	0
1011	short-chain dehydrogenase/reductase [Synechococcus sp. PCC 7002]	gi|170076936	27 kDa	5.8498	5.5925	5.0225	9.2098	6.6584	3.7788
1012	folylpolyglutamate synthase [Synechococcus sp. PCC 7002]	gi|170077029	46 kDa	1.4624	4.7936	2.5112	1.3157	0.9512	2.8341
1013	translation initiation factor IF-1 [Synechococcus sp. PCC 7002]	gi|170077665	9 kDa	4.3873	4.7936	7.5337	5.2628	8.5608	10.392
1014	ABC transporter ATP-binding protein [Synechococcus sp. PCC 7002]	gi|170078235	26 kDa	7.3122	6.3915	5.0225	5.2628	5.7072	5.6681
1015	DnaJ domain-containing protein [Synechococcus sp. PCC 7002]	gi|170078530	35 kDa	4.3873	6.3915	3.3483	2.6314	2.8536	0.94469
1016	hypothetical protein SYNPCC7002_A2688 [Synechococcus sp. PCC 7002]	gi|170079281	17 kDa	4.3873	3.9947	5.0225	2.6314	3.8048	5.6681
1017	restriction endonuclease Mrr [Synechococcus sp. PCC 7002]	gi|170077622	32 kDa	1.4624	3.9947	0	0	1.9024	1.8894
1018	ParaA family ATPase [Synechococcus sp. PCC 7002]	gi|170079465	25 kDa	2.9249	4.7936	8.3708	5.2628	0.9512	5.6681
1019	ubiquinone/menaquinone biosynthesis methyltransferase [Synechococcus sp. PCC 7002]	gi|170077720	26 kDa	2.9249	4.7936	2.5112	0	2.8536	3.7788
1020	thioredoxin [Synechococcus sp. PCC 7002]	gi|170078963	12 kDa	11.7	10.386	17.579	7.8941	9.512	7.5575
1021	coproporphyrinogen III oxidase [Synechococcus sp. PCC 7002]	gi|170079417	45 kDa	1.4624	0.79893	1.6742	0	0.9512	0
1022	hypothetical protein SYNPCC7002_A0569 [Synechococcus sp. PCC 7002]	gi|170077194	14 kDa	8.7747	5.5925	4.1854	7.8941	5.7072	7.5575
1023	radical SAM protein [Synechococcus sp. PCC 7002]	gi|170077338	39 kDa	4.3873	1.5979	0.83708	2.6314	0.9512	0.94469
1024	ATPase, P-type (transporting), HAD superfamily, subfamily IC [Synechococcus sp. PCC 7002]	gi|170076482	107 kDa	1.4624	0.79893	0	0	0.9512	1.8894
1025	glycosyl transferase family protein [Synechococcus sp. PCC 7002]	gi|170078121	36 kDa	0	1.5979	0	0	0.9512	0.94469
1026	two-component hybrid sensor and regulator [Synechococcus sp. PCC 7002]	gi|170077968	42 kDa	1.4624	0.79893	1.6742	0	1.9024	2.8341
1027	hypothetical protein SYNPCC7002_A0392 [Synechococcus sp. PCC 7002]	gi|170077020	10 kDa	1.4624	5.5925	10.045	1.3157	3.8048	3.7788
1028	hypothetical protein SYNPCC7002_A0856 [Synechococcus sp. PCC 7002]	gi|170077478	12 kDa	5.8498	4.7936	5.0225	6.5785	4.756	5.6681
1029	O-antigen polymerase domain-containing protein [Synechococcus sp. PCC 7002]	gi|170078147	96 kDa	0	2.3968	0	0	0.9512	0
1030	hypothetical protein SYNPCC7002_A1076 [Synechococcus sp. PCC 7002]	gi|170077696	47 kDa	1.4624	3.1957	5.0225	2.6314	3.8048	2.8341
1031	hypothetical protein SYNPCC7002_A1544 [Synechococcus sp. PCC 7002]	gi|170078153	23 kDa	7.3122	3.9947	4.1854	5.2628	4.756	4.7234
1032	hypothetical protein SYNPCC7002_A1787 [Synechococcus sp. PCC 7002]	gi|170078393	24 kDa	7.3122	3.1957	6.6966	2.6314	3.8048	2.8341
1033	Holliday junction DNA helicase RuvB [Synechococcus sp. PCC 7002]	gi|170078004	40 kDa	2.9249	1.5979	0.83708	0	0.9512	1.8894
1034	N6-adenine-specific DNA methylase [Synechococcus sp. PCC 7002]	gi|170078288	42 kDa	0	5.5925	2.5112	1.3157	5.7072	3.7788
1035	M23 peptidase domain-containing protein [Synechococcus sp. PCC 7002]	gi|170079355	69 kDa	1.4624	0	0	0	3.8048	1.8894
1036	hypothetical protein SYNPCC7002_A2596 [Synechococcus sp. PCC 7002]	gi|170079190	29 kDa	2.9249	5.5925	13.393	0	0	0.94469
1037	periplasmic binding protein of ABC transporter [Synechococcus sp. PCC 7002]	gi|170076941	43 kDa	4.3873	3.9947	2.5112	2.6314	5.7072	3.7788
1038	signal transduction histidine kinase [Synechococcus sp. PCC 7002]	gi|170078014	75 kDa	2.9249	3.9947	0	0	1.9024	0.94469
1039	hypothetical protein SYNPCC7002_A0638 [Synechococcus sp. PCC 7002]	gi|170077261	43 kDa	1.4624	4.7936	4.1854	2.6314	2.8536	2.8341
1040	ATP-binding protein of ABC transporter for iron compound [Synechococcus sp. PCC 7002]	gi|170076556	31 kDa	10.237	9.5872	5.0225	0	0	0
1041	hypothetical protein SYNPCC7002_A0594 [Synechococcus sp. PCC 7002]	gi|170077219	34 kDa	1.4624	0.79893	1.6742	1.3157	0.9512	1.8894
1042	hypothetical protein SYNPCC7002_A1257 [Synechococcus sp. PCC 7002]	gi|170077873	13 kDa	1.4624	3.1957	5.8596	5.2628	1.9024	2.8341
1043	hypothetical protein SYNPCC7002_A1572 [Synechococcus sp. PCC 7002]	gi|170078181	33 kDa	4.3873	6.3915	6.6966	3.9471	7.6096	8.5022
1044	hypothetical protein SYNPCC7002_A2626 [Synechococcus sp. PCC 7002]	gi|170079220	27 kDa	8.7747	5.5925	13.393	6.5785	3.8048	4.7234
1045	zinc-binding dehydrogenase family oxidoreductase [Synechococcus sp. PCC 7002]	gi|170079331	37 kDa	2.9249	5.5925	1.6742	1.3157	5.7072	2.8341
1046	putative SAM-dependent methyltransferase [Synechococcus sp. PCC 7002]	gi|170077801	45 kDa	1.4624	0.79893	0	0	1.9024	0.94469
1047	hypothetical protein SYNPCC7002_A0033 [Synechococcus sp. PCC 7002]	gi|170076668	48 kDa	1.4624	1.5979	0.83708	0	0.9512	0
1048	sodium/sulfate symporter [Synechococcus sp. PCC 7002]	gi|170077416	65 kDa	1.4624	1.5979	0	0	1.9024	0
1049	inositol monophosphatase family protein [Synechococcus sp. PCC 7002]	gi|170077329	33 kDa	4.3873	7.9893	10.045	1.3157	9.512	7.5575
1050	putative sulfite oxidase subunit YedY [Synechococcus sp. PCC 7002]	gi|170076720	38 kDa	0	0.79893	0	0	1.9024	0.94469
1051	hypothetical protein SYNPCC7002_A0790 [Synechococcus sp. PCC 7002]	gi|170077412	38 kDa	1.4624	1.5979	3.3483	1.3157	0.9512	1.8894
1052	ABC transporter family protein [Synechococcus sp. PCC 7002]	gi|170078866	60 kDa	0	5.5925	0.83708	0	1.9024	1.8894
1053	precorrin-6B methylase [Synechococcus sp. PCC 7002]	gi|170077520	22 kDa	5.8498	2.3968	7.5337	5.2628	4.756	5.6681
1054	ankyrin repeat-containing protein [Synechococcus sp. PCC 7002]	gi|170078002	51 kDa	2.9249	3.9947	1.6742	2.6314	1.9024	1.8894
1055	putative extracellular solute-binding protein [Synechococcus sp. PCC 7002]	gi|170078623	61 kDa	2.9249	5.5925	4.1854	0	2.8536	3.7788
1056	hypothetical protein SYNPCC7002_A2040 [Synechococcus sp. PCC 7002]	gi|170078644	26 kDa	2.9249	2.3968	8.3708	3.9471	4.756	2.8341
1057	glycoside hydrolase family protein [Synechococcus sp. PCC 7002]	gi|170078112	49 kDa	1.4624	4.7936	2.5112	0	0.9512	0.94469
1058	PhoH-like protein [Synechococcus sp. PCC 7002]	gi|170076822	49 kDa	1.4624	3.9947	1.6742	3.9471	3.8048	5.6681
1059	nucleoside triphosphate pyrophosphohydrolase [Synechococcus sp. PCC 7002]	gi|170077411	31 kDa	1.4624	1.5979	2.5112	1.3157	0.9512	0.94469
1060	cytochrome b6 [Synechococcus sp. PCC 7002]	gi|170077464	25 kDa	13.162	7.9893	5.0225	9.2098	9.512	7.5575
1061	two-component response regulator [Synechococcus sp. PCC 7002]	gi|170078637	25 kDa	1.4624	3.9947	3.3483	3.9471	1.9024	4.7234
1062	glutamate-cysteine ligase [Synechococcus sp. PCC 7002]	gi|170079357	43 kDa	5.8498	3.9947	6.6966	5.2628	8.5608	4.7234
1063	hypothetical protein SYNPCC7002_A0114 [Synechococcus sp. PCC 7002]	gi|170076747	22 kDa	2.9249	3.9947	5.8596	5.2628	3.8048	8.5022
1064	hypothetical protein SYNPCC7002_A0968 [Synechococcus sp. PCC 7002]	gi|170077589	22 kDa	1.4624	2.3968	1.6742	1.3157	3.8048	3.7788
1065	hypothetical protein SYNPCC7002_A1624 [Synechococcus sp. PCC 7002]	gi|170078232	21 kDa	1.4624	2.3968	4.1854	1.3157	1.9024	1.8894
1066	hypothetical protein SYNPCC7002_F0061 [Synechococcus sp. PCC 7002]	gi|170079614	25 kDa	1.4624	3.9947	5.0225	1.3157	1.9024	3.7788
1067	hypothetical protein SYNPCC7002_A0530 [Synechococcus sp. PCC 7002]	gi|170077155	16 kDa	10.237	8.7883	14.23	15.788	10.463	9.4469
1068	hypothetical protein SYNPCC7002_A0965 [Synechococcus sp. PCC 7002]	gi|170077586	21 kDa	0	1.5979	1.6742	0	0	0.94469
1069	hypothetical protein SYNPCC7002_A0747 [Synechococcus sp. PCC 7002]	gi|170077370	48 kDa	0	1.5979	3.3483	0	3.8048	4.7234
1070	CobQ/CobB/MinD/ParA nucleotide binding domain-containing protein [Synechococcus sp. PCC 7002]	gi|170077943	23 kDa	8.7747	6.3915	6.6966	6.5785	5.7072	7.5575
1071	carbon dioxide concentrating mechanism protein [Synechococcus sp. PCC 7002]	gi|170078984	30 kDa	5.8498	6.3915	2.5112	1.3157	3.8048	2.8341
1072	hypothetical protein SYNPCC7002_A0252 [Synechococcus sp. PCC 7002]	gi|170076881	22 kDa	1.4624	2.3968	6.6966	1.3157	1.9024	1.8894
1073	hypothetical protein SYNPCC7002_A2699 [Synechococcus sp. PCC 7002]	gi|170079292	47 kDa	1.4624	1.5979	0.83708	0	0.9512	0.94469
1074	hypothetical protein SYNPCC7002_A1035 [Synechococcus sp. PCC 7002]	gi|170077655	12 kDa	4.3873	3.9947	11.719	5.2628	2.8536	1.8894
1075	hypothetical protein SYNPCC7002_A1783 [Synechococcus sp. PCC 7002]	gi|170078389	36 kDa	0	4.7936	2.5112	0	5.7072	4.7234
1076	methyltransferase, FkbM family protein [Synechococcus sp. PCC 7002]	gi|170077759	28 kDa	0	7.1904	0.83708	0	2.8536	1.8894
1077	glycosyl transferase family protein [Synechococcus sp. PCC 7002]	gi|170077000	36 kDa	1.4624	1.5979	0.83708	1.3157	0.9512	0.94469
1078	M48 family peptidase [Synechococcus sp. PCC 7002]	gi|170076854	32 kDa	4.3873	3.1957	4.1854	0	0	0.94469
1079	GTP-binding protein Era [Synechococcus sp. PCC 7002]	gi|170077145	35 kDa	2.9249	2.3968	4.1854	7.8941	5.7072	1.8894
1080	PfkB family of carbohydrate kinases; fructokinase [Synechococcus sp. PCC 7002]	gi|170077508	32 kDa	5.8498	6.3915	8.3708	7.8941	7.6096	7.5575
1081	deoxycytidine triphosphate deaminase [Synechococcus sp. PCC 7002]	gi|170077925	22 kDa	4.3873	4.7936	3.3483	5.2628	4.756	4.7234
1082	hypothetical protein SYNPCC7002_A2176 [Synechococcus sp. PCC 7002]	gi|170078774	20 kDa	2.9249	8.7883	5.0225	6.5785	7.6096	7.5575
1083	L-cysteine/cystine lyase [Synechococcus sp. PCC 7002]	gi|170078927	42 kDa	4.3873	4.7936	4.1854	5.2628	5.7072	2.8341
1084	pentapeptide repeat-containing protein [Synechococcus sp. PCC 7002]	gi|170077406	18 kDa	4.3873	5.5925	10.882	10.526	6.6584	3.7788
1085	exonuclease [Synechococcus sp. PCC 7002]	gi|170078937	45 kDa	1.4624	2.3968	0.83708	0	0.9512	0.94469
1086	YrdC domain-containing protein [Synechococcus sp. PCC 7002]	gi|170077858	21 kDa	5.8498	7.9893	11.719	1.3157	6.6584	6.6128
1087	glycosyl transferase family protein [Synechococcus sp. PCC 7002]	gi|170078119	46 kDa	0	2.3968	0.83708	0	0	0.94469
1088	phosphate transport system regulatory protein PhoU [Synechococcus sp. PCC 7002]	gi|170078315	26 kDa	0	1.5979	0.83708	0	0	0.94469
1089	stationary phase survival protein SurE [Synechococcus sp. PCC 7002]	gi|170078046	25 kDa	1.4624	0.79893	0.83708	0	6.6584	3.7788
1090	50S ribosomal protein L31 [Synechococcus sp. PCC 7002]	gi|170077657	9 kDa	0	2.3968	4.1854	3.9471	6.6584	4.7234
1091	NADH dehydrogenase subunit 5 [Synechococcus sp. PCC 7002]	gi|154516 (+1)	73 kDa	4.3873	3.9947	1.6742	1.3157	3.8048	2.8341
1092	hypothetical protein SYNPCC7002_G0009 [Synechococcus sp. PCC 7002]	gi|170076479	11 kDa	4.3873	4.7936	6.6966	1.3157	3.8048	3.7788
1093	rubredoxin [Synechococcus sp. PCC 7002]	gi|170076858	12 kDa	5.8498	8.7883	9.2079	11.841	11.414	12.281
1094	hypothetical protein SYNPCC7002_A1419 [Synechococcus sp. PCC 7002]	gi|170078028	22 kDa	5.8498	7.1904	2.5112	2.6314	2.8536	1.8894
1095	hypothetical protein SYNPCC7002_A1786 [Synechococcus sp. PCC 7002]	gi|170078392	22 kDa	4.3873	3.1957	4.1854	5.2628	1.9024	3.7788
1096	type II NADH dehydrogenase B [Synechococcus sp. PCC 7002]	gi|170078719	43 kDa	5.8498	7.9893	3.3483	1.3157	5.7072	0.94469
1097	ParA, plasmid partitioning protein [Synechococcus sp. PCC 7002]	gi|170079514	23 kDa	2.9249	4.7936	6.6966	6.5785	4.756	7.5575
1098	ABC transporter family protein [Synechococcus sp. PCC 7002]	gi|170079375	65 kDa	4.3873	3.1957	0.83708	1.3157	1.9024	1.8894
1099	hypothetical protein SYNPCC7002_A0561 [Synechococcus sp. PCC 7002]	gi|170077186	13 kDa	5.8498	4.7936	2.5112	2.6314	6.6584	6.6128
1100	putative GTPase [Synechococcus sp. PCC 7002]	gi|170077566	59 kDa	0	0.79893	0	0	0	1.8894
1101	glycerol dehydrogenase [Synechococcus sp. PCC 7002]	gi|170077230	42 kDa	2.9249	7.1904	2.5112	0	0	0
1102	hypothetical protein SYNPCC7002_A1329 [Synechococcus sp. PCC 7002]	gi|170077944	22 kDa	0	3.1957	14.23	0	4.756	8.5022
1103	3-dehydroquinate synthase [Synechococcus sp. PCC 7002]	gi|170077764	40 kDa	4.3873	4.7936	5.0225	3.9471	3.8048	5.6681
1104	signal peptidase I [Synechococcus sp. PCC 7002]	gi|170078044	24 kDa	10.237	3.9947	4.1854	6.5785	7.6096	8.5022
1105	hypothetical protein SYNPCC7002_A2400 [Synechococcus sp. PCC 7002]	gi|170078995	20 kDa	8.7747	7.1904	5.0225	1.3157	6.6584	5.6681
1106	hypothetical protein SYNPCC7002_F0047 [Synechococcus sp. PCC 7002]	gi|170079600	42 kDa	1.4624	6.3915	2.5112	1.3157	6.6584	4.7234
1107	acetyl-CoA carboxylase, biotin carboxyl carrier protein [Synechococcus sp. PCC 7002]	gi|170076687	18 kDa	5.8498	3.1957	3.3483	10.526	3.8048	2.8341
1108	ABC transporter family protein [Synechococcus sp. PCC 7002]	gi|170078787	64 kDa	1.4624	3.1957	0.83708	0	1.9024	0.94469
1109	hypothetical protein SYNPCC7002_A1493 [Synechococcus sp. PCC 7002]	gi|170078102	35 kDa	0	3.1957	0.83708	0	0.9512	0
1110	hypothetical protein SYNPCC7002_F0034 [Synechococcus sp. PCC 7002]	gi|170079587	26 kDa	2.9249	2.3968	0.83708	2.6314	1.9024	0
1111	hypothetical protein SYNPCC7002_A1128 [Synechococcus sp. PCC 7002]	gi|170077746	20 kDa	0	2.3968	1.6742	0	0.9512	2.8341
1112	ferredoxin [2Fe-2S] II [Synechococcus sp. PCC 7002]	gi|170077248	14 kDa	0	0.79893	1.6742	5.2628	4.756	3.7788
1113	hypothetical protein SYNPCC7002_A2646 [Synechococcus sp. PCC 7002]	gi|170079240	29 kDa	0	1.5979	2.5112	0	0	1.8894
1114	glutathione peroxidase [Synechococcus sp. PCC 7002]	gi|170076750	18 kDa	0	6.3915	10.045	1.3157	5.7072	3.7788
1115	hypothetical protein SYNPCC7002_A1674 [Synechococcus sp. PCC 7002]	gi|170078281	50 kDa	4.3873	5.5925	5.8596	2.6314	2.8536	0.94469
1116	hypothetical protein SYNPCC7002_A2081 [Synechococcus sp. PCC 7002]	gi|170078684	15 kDa	1.4624	3.1957	8.3708	1.3157	0.9512	1.8894
1117	hypothetical protein SYNPCC7002_A0786 [Synechococcus sp. PCC 7002]	gi|170077408	21 kDa	2.9249	3.1957	4.1854	1.3157	2.8536	2.8341
1118	hypothetical protein SYNPCC7002_A2551 [Synechococcus sp. PCC 7002]	gi|170079145	48 kDa	1.4624	1.5979	1.6742	0	1.9024	0.94469
1119	hypothetical protein SYNPCC7002_A1511 [Synechococcus sp. PCC 7002]	gi|170078120	35 kDa	1.4624	0.79893	0	0	1.9024	0.94469
1120	molybdenum cofactor biosynthesis protein C [Synechococcus sp. PCC 7002]	gi|170078888	18 kDa	0	1.5979	4.1854	0	1.9024	3.7788
1121	transcriptional regulator [Synechococcus sp. PCC 7002]	gi|170078395	26 kDa	1.4624	1.5979	3.3483	1.3157	2.8536	2.8341
1122	hypothetical protein SYNPCC7002_A2135 [Synechococcus sp. PCC 7002]	gi|170078734	23 kDa	1.4624	3.9947	5.0225	2.6314	3.8048	2.8341
1123	hypothetical protein SYNPCC7002_A0463 [Synechococcus sp. PCC 7002]	gi|170077089	20 kDa	2.9249	4.7936	0.83708	1.3157	6.6584	5.6681
1124	phosphoglucomutase/phosphomannomutase [Synechococcus sp. PCC 7002]	gi|170078101	54 kDa	1.4624	3.1957	0	2.6314	2.8536	1.8894
1125	hypothetical protein SYNPCC7002_A0519 [Synechococcus sp. PCC 7002]	gi|170077144	16 kDa	4.3873	4.7936	4.1854	3.9471	4.756	4.7234
1126	aldehyde dehydrogenase (NAD) family protein [Synechococcus sp. PCC 7002]	gi|170077208	46 kDa	2.9249	2.3968	2.5112	2.6314	2.8536	7.5575
1127	hypothetical protein SYNPCC7002_A1664 [Synechococcus sp. PCC 7002]	gi|170078271	17 kDa	5.8498	3.1957	3.3483	2.6314	4.756	4.7234
1128	shikimate 5-dehydrogenase [Synechococcus sp. PCC 7002]	gi|170078337	31 kDa	1.4624	8.7883	10.045	7.8941	10.463	11.336
1129	hypothetical protein SYNPCC7002_A1981 [Synechococcus sp. PCC 7002]	gi|170078585	18 kDa	7.3122	11.185	9.2079	7.8941	7.6096	8.5022
1130	hypothetical protein SYNPCC7002_G0004 [Synechococcus sp. PCC 7002]	gi|170076474	21 kDa	8.7747	7.1904	10.045	9.2098	7.6096	8.5022
1131	transcriptional regulator [Synechococcus sp. PCC 7002]	gi|170078467	26 kDa	1.4624	3.9947	5.0225	1.3157	3.8048	4.7234
1132	putative ribonuclease D [Synechococcus sp. PCC 7002]	gi|170078658	24 kDa	2.9249	3.9947	3.3483	0	2.8536	2.8341
1133	mutator MutT protein [Synechococcus sp. PCC 7002]	gi|170076695	15 kDa	0	1.5979	1.6742	1.3157	1.9024	2.8341
1134	WD repeat-containing protein [Synechococcus sp. PCC 7002]	gi|170076902	58 kDa	7.3122	11.185	5.8596	3.9471	6.6584	6.6128
1135	glycine cleavage T-protein (aminomethyltransferase) [Synechococcus sp. PCC 7002]	gi|170077702	39 kDa	4.3873	3.9947	8.3708	5.2628	3.8048	5.6681
1136	CHAD domain-containing protein [Synechococcus sp. PCC 7002]	gi|170078945	37 kDa	1.4624	0.79893	0.83708	1.3157	0.9512	1.8894
1137	hypothetical protein SYNPCC7002_A2840 [Synechococcus sp. PCC 7002]	gi|170079426	22 kDa	4.3873	3.9947	3.3483	5.2628	0.9512	1.8894
1138	ABC transporter ATP-binding subunit [Synechococcus sp. PCC 7002]	gi|170078643	42 kDa	1.4624	3.9947	0.83708	0	4.756	2.8341
1139	hypothetical protein SYNPCC7002_A1221 [Synechococcus sp. PCC 7002]	gi|170077837	48 kDa	2.9249	2.3968	1.6742	0	1.9024	1.8894
1140	stationary phase survival protein SurE [Synechococcus sp. PCC 7002]	gi|170077117	31 kDa	5.8498	4.7936	8.3708	7.8941	6.6584	6.6128
1141	hypothetical protein SYNPCC7002_A1222 [Synechococcus sp. PCC 7002]	gi|170077838	40 kDa	5.8498	5.5925	1.6742	2.6314	3.8048	2.8341
1142	ABC-type multidrug/protein/lipid transport system, ATPase component [Synechococcus sp. PCC 7002]	gi|170078114	67 kDa	0	2.3968	0	0	0	0
1143	hypothetical protein SYNPCC7002_A0011 [Synechococcus sp. PCC 7002]	gi|170076647	22 kDa	0	1.5979	1.6742	0	1.9024	0.94469
1144	periplasmic binding protein [Synechococcus sp. PCC 7002]	gi|170076475	37 kDa	2.9249	5.5925	5.8596	0	0	0
1145	oxidoreductase (NAD-binding Rossmann fold) [Synechococcus sp. PCC 7002]	gi|170076942	42 kDa	4.3873	5.5925	5.8596	2.6314	7.6096	3.7788
1146	UDP-3-O-[3-hydroxymyristoyl] glucosamine N-acyltransferase [Synechococcus sp. PCC 7002]	gi|170077563	36 kDa	7.3122	10.386	5.8596	2.6314	10.463	8.5022
1147	hypothetical protein SYNPCC7002_A0948 [Synechococcus sp. PCC 7002]	gi|170077570	31 kDa	4.3873	8.7883	2.5112	2.6314	5.7072	8.5022
1148	NAD-dependent epimerase/dehydratase family protein [Synechococcus sp. PCC 7002]	gi|170077592	37 kDa	5.8498	5.5925	1.6742	1.3157	1.9024	4.7234
1149	hypothetical protein SYNPCC7002_A0990 [Synechococcus sp. PCC 7002]	gi|170077611	14 kDa	5.8498	4.7936	4.1854	5.2628	5.7072	4.7234
1150	ABC transporter family protein [Synechococcus sp. PCC 7002]	gi|170078707	37 kDa	4.3873	3.1957	3.3483	2.6314	5.7072	3.7788
1151	NADH-dependent dehydrogenase family protein [Synechococcus sp. PCC 7002]	gi|170077064	39 kDa	4.3873	3.9947	1.6742	2.6314	4.756	0.94469
1152	glutamyl-tRNA (Gln) amidotransferase chain C [Synechococcus sp. PCC 7002]	gi|170078174	11 kDa	1.4624	1.5979	3.3483	2.6314	1.9024	3.7788
1153	bumetanide-sensitive Na-K-Cl cotransporter [Synechococcus sp. PCC 7002]	gi|170076593	80 kDa	1.4624	2.3968	0	0	0	0.94469
1154	nitrate transport protein, NrtC like protein [Synechococcus sp. PCC 7002]	gi|170077788	50 kDa	0	1.5979	0.83708	0	1.9024	0
1155	restriction endonuclease [Synechococcus sp. PCC 7002]	gi|170078182	20 kDa	1.4624	1.5979	0	0	0	0
1156	hypothetical protein SYNPCC7002_A1679 [Synechococcus sp. PCC 7002]	gi|170078286	22 kDa	1.4624	0.79893	3.3483	0	0	0
1157	hypothetical protein SYNPCC7002_A1430 [Synechococcus sp. PCC 7002]	gi|170078039	18 kDa	0	1.5979	1.6742	0	0	0
1158	UDP-N-acetylglucosamine 2-epimerase [Synechococcus sp. PCC 7002]	gi|170077830	41 kDa	2.9249	6.3915	5.8596	7.8941	6.6584	4.7234
1159	hypothetical protein SYNPCC7002_A1539 [Synechococcus sp. PCC 7002]	gi|170078148	16 kDa	4.3873	4.7936	4.1854	6.5785	5.7072	5.6681
1160	2-C-methyl-D-erythritol 4-phosphate cytidylyltransferase [Synechococcus sp. PCC 7002]	gi|170078510	25 kDa	4.3873	5.5925	5.8596	3.9471	5.7072	6.6128
1161	two-component response regulator [Synechococcus sp. PCC 7002]	gi|170079118	25 kDa	4.3873	6.3915	9.2079	6.5785	5.7072	3.7788
1162	photosystem I assembly protein Ycf4 [Synechococcus sp. PCC 7002]	gi|170077713	21 kDa	14.624	7.1904	5.8596	6.5785	7.6096	10.392
1163	glutamine amidotransferase [Synechococcus sp. PCC 7002]	gi|170078925	29 kDa	2.9249	3.9947	1.6742	1.3157	1.9024	4.7234
1164	30S ribosomal protein S17 [Synechococcus sp. PCC 7002]	gi|170077676	9 kDa	1.4624	2.3968	3.3483	2.6314	2.8536	1.8894
1165	tRNA (guanine-N(1)-)-methyltransferase [Synechococcus sp. PCC 7002]	gi|170079002	26 kDa	0	3.1957	1.6742	0	0	2.8341
1166	glycosyltransferase [Synechococcus sp. PCC 7002]	gi|170079029	44 kDa	2.9249	0.79893	0	1.3157	0	0
1167	cyanate hydratase [Synechococcus sp. PCC 7002]	gi|170077485	16 kDa	0	4.7936	3.3483	1.3157	1.9024	1.8894
1168	phosphate/phosphonate ABC transporter periplasmic protein [Synechococcus sp. PCC 7002]	gi|170076964	34 kDa	8.7747	6.3915	5.0225	7.8941	6.6584	10.392
1169	hypothetical protein SYNPCC7002_A1770 [Synechococcus sp. PCC 7002]	gi|170078377	25 kDa	1.4624	3.1957	2.5112	2.6314	2.8536	2.8341
1170	alanine dehydrogenase [Synechococcus sp. PCC 7002]	gi|170079365	38 kDa	8.7747	7.1904	3.3483	2.6314	5.7072	5.6681
1171	hypothetical protein SYNPCC7002_A2051 [Synechococcus sp. PCC 7002]	gi|170078655	15 kDa	5.8498	5.5925	5.8596	3.9471	5.7072	8.5022
1172	mercuric reductase [Synechococcus sp. PCC 7002]	gi|170077910	52 kDa	2.9249	7.1904	1.6742	0	0.9512	2.8341
1173	glycoside hydrolase family protein [Synechococcus sp. PCC 7002]	gi|170078125	46 kDa	0	0.79893	0	0	1.9024	0
1174	phosphomethylpyrimidine kinase [Synechococcus sp. PCC 7002]	gi|170076661	28 kDa	0	1.5979	3.3483	0	0.9512	0
1175	sporulation protein [Synechococcus sp. PCC 7002]	gi|170078496	41 kDa	0	0	1.6742	0	5.7072	4.7234
1176	cysteine desulfurase [Synechococcus sp. PCC 7002]	gi|170077543	42 kDa	0	2.3968	0	0	0.9512	0
1177	circadian clock protein KaiB [Synechococcus sp. PCC 7002]	gi|170076916	12 kDa	4.3873	7.9893	9.2079	9.2098	4.756	6.6128
1178	BolA family protein; stress induced morphogen [Synechococcus sp. PCC 7002]	gi|170077171	9 kDa	7.3122	9.5872	10.045	10.526	8.5608	11.336
1179	hypothetical protein SYNPCC7002_A2682 [Synechococcus sp. PCC 7002]	gi|170079275	55 kDa	4.3873	1.5979	1.6742	1.3157	1.9024	3.7788
1180	hypothetical protein SYNPCC7002_A2717 [Synechococcus sp. PCC 7002]	gi|170079310	26 kDa	5.8498	3.9947	7.5337	6.5785	3.8048	5.6681
1181	fructoseamine 3-kinase family phosophotransferase [Synechococcus sp. PCC 7002]	gi|170077016	32 kDa	2.9249	6.3915	7.5337	5.2628	7.6096	6.6128
1182	oligopeptide transport system permease [Synechococcus sp. PCC 7002]	gi|170078064	40 kDa	2.9249	1.5979	1.6742	0	1.9024	1.8894
1183	NUDIX hydrolase; ADP-ribose pyrophosphatase [Synechococcus sp. PCC 7002]	gi|170076755	20 kDa	5.8498	3.9947	7.5337	7.8941	6.6584	5.6681
1184	hypothetical protein SYNPCC7002_A0381 [Synechococcus sp. PCC 7002]	gi|170077009	30 kDa	4.3873	2.3968	0.83708	2.6314	1.9024	2.8341
1185	preprotein translocase subunit SecD [Synechococcus sp. PCC 7002]	gi|170077279	49 kDa	16.087	7.9893	4.1854	7.8941	7.6096	5.6681
1186	short chain dehydrogenase/reductase family oxidoreductase [Synechococcus sp. PCC 7002]	gi|170078094	33 kDa	2.9249	6.3915	5.0225	3.9471	3.8048	2.8341
1187	Ycf66-like protein [Synechococcus sp. PCC 7002]	gi|170077383	35 kDa	4.3873	5.5925	2.5112	3.9471	3.8048	4.7234
1188	hypothetical protein SYNPCC7002_A1182 [Synechococcus sp. PCC 7002]	gi|170077799	15 kDa	1.4624	3.9947	6.6966	2.6314	1.9024	2.8341
1189	acetyltransferase family protein [Synechococcus sp. PCC 7002]	gi|170078621	24 kDa	1.4624	6.3915	7.5337	1.3157	3.8048	0.94469
1190	hypothetical protein SYNPCC7002_A2440 [Synechococcus sp. PCC 7002]	gi|170079035	31 kDa	4.3873	5.5925	11.719	0	3.8048	3.7788
1191	hypothetical protein SYNPCC7002_A0394 [Synechococcus sp. PCC 7002]	gi|170077022	32 kDa	0	0.79893	0	0	1.9024	0.94469
1192	putative deoxyribonuclease [Synechococcus sp. PCC 7002]	gi|170078651	29 kDa	1.4624	0.79893	1.6742	1.3157	2.8536	2.8341
1193	ParB family chromosome partitioning protein [Synechococcus sp. PCC 7002]	gi|170079555	34 kDa	2.9249	2.3968	4.1854	9.2098	2.8536	4.7234
1194	peptide deformylase [Synechococcus sp. PCC 7002]	gi|170078943	21 kDa	2.9249	5.5925	9.2079	3.9471	5.7072	8.5022
1195	hypothetical protein SYNPCC7002_A0598 [Synechococcus sp. PCC 7002]	gi|170077223	27 kDa	2.9249	3.1957	1.6742	0	1.9024	0.94469
1196	oligoketide cyclase/lipid transport protein [Synechococcus sp. PCC 7002]	gi|170079231	18 kDa	2.9249	2.3968	6.6966	2.6314	0.9512	2.8341
1197	50S ribosomal protein L29 [Synechococcus sp. PCC 7002]	gi|170077677	8 kDa	8.7747	7.9893	10.882	9.2098	10.463	12.281
1198	hypothetical protein SYNPCC7002_A1556 [Synechococcus sp. PCC 7002]	gi|170078165	27 kDa	0	1.5979	5.0225	3.9471	3.8048	2.8341
1199	alpha/beta fold family hydrolase [Synechococcus sp. PCC 7002]	gi|170079263	30 kDa	1.4624	4.7936	9.2079	5.2628	6.6584	6.6128
1200	aromatic acid decarboxylase [Synechococcus sp. PCC 7002]	gi|170078020	23 kDa	2.9249	2.3968	1.6742	0	2.8536	0
1201	NAD dependent epimerase/dehydratase family protein [Synechococcus sp. PCC 7002]	gi|170077539	30 kDa	0	2.3968	5.0225	2.6314	1.9024	0.94469
1202	hypothetical protein SYNPCC7002_A2562 [Synechococcus sp. PCC 7002]	gi|170079156	30 kDa	7.3122	7.9893	15.905	1.3157	3.8048	3.7788
1203	tryptophanyl-tRNA synthetase [Synechococcus sp. PCC 7002]	gi|170076672	37 kDa	0	3.1957	1.6742	1.3157	3.8048	0.94469
1204	acyl-[acyl-carrier-protein]--UDP-N-acetylglucosamine O-acyltransferase [Synechococcus sp. PCC 7002]	gi|170076704	29 kDa	1.4624	2.3968	0.83708	0	1.9024	1.8894
1205	Fe-S oxidoreductase [Synechococcus sp. PCC 7002]	gi|170076887	50 kDa	1.4624	3.1957	1.6742	2.6314	3.8048	1.8894
1206	HD domain-containing protein [Synechococcus sp. PCC 7002]	gi|170077344	21 kDa	1.4624	2.3968	5.8596	2.6314	3.8048	2.8341
1207	RNA methyltransferase [Synechococcus sp. PCC 7002]	gi|170076759	25 kDa	0	1.5979	1.6742	0	1.9024	1.8894
1208	endonuclease III [Synechococcus sp. PCC 7002]	gi|170079050	24 kDa	0	0.79893	0.83708	0	0.9512	2.8341
1209	phosphoribosylglycinamide formyltransferase [Synechococcus sp. PCC 7002]	gi|170076643	23 kDa	2.9249	4.7936	6.6966	3.9471	3.8048	5.6681
1210	nicotinate (nicotinamide) nucleotide adenylyltransferase [Synechococcus sp. PCC 7002]	gi|170077500	22 kDa	4.3873	3.1957	6.6966	5.2628	4.756	5.6681
1211	dienelactone hydrolase family protein [Synechococcus sp. PCC 7002]	gi|170077912	28 kDa	4.3873	4.7936	10.882	5.2628	4.756	3.7788
1212	cytochrome C oxidase subunit II [Synechococcus sp. PCC 7002]	gi|170077350	34 kDa	2.9249	5.5925	1.6742	3.9471	1.9024	2.8341
1213	hypothetical protein SYNPCC7002_A2010 [Synechococcus sp. PCC 7002]	gi|170078614	45 kDa	1.4624	3.9947	3.3483	2.6314	3.8048	1.8894
1214	cobyric acid synthase glutamine amidotransferase subunit [Synechococcus sp. PCC 7002]	gi|170078258	55 kDa	1.4624	5.5925	1.6742	0	2.8536	0
1215	pyridoxamine 5'-phosphate oxidase [Synechococcus sp. PCC 7002]	gi|170079185	25 kDa	0	1.5979	3.3483	1.3157	1.9024	1.8894
1216	processing proteinase [Synechococcus sp. PCC 7002]	gi|170079089	49 kDa	1.4624	0	0	0	1.9024	1.8894
1217	CheW-like domain-containing protein [Synechococcus sp. PCC 7002]	gi|170079194	18 kDa	0	3.1957	1.6742	0	0.9512	0
1218	Ser/Thr protein phosphatase family protein [Synechococcus sp. PCC 7002]	gi|170078753	39 kDa	0	0	2.5112	0	0	0
1219	circadian clock protein KaiA [Synechococcus sp. PCC 7002]	gi|170076917	35 kDa	7.3122	3.1957	4.1854	5.2628	4.756	2.8341
1220	N-acetylmuramic acid 6-phosphate etherase [Synechococcus sp. PCC 7002]	gi|170078031	32 kDa	2.9249	3.9947	1.6742	1.3157	2.8536	1.8894
1221	hypothetical protein SYNPCC7002_A2288 [Synechococcus sp. PCC 7002]	gi|170078884	30 kDa	7.3122	2.3968	7.5337	3.9471	2.8536	2.8341
1222	protein kinase AarF [Synechococcus sp. PCC 7002]	gi|170078253	61 kDa	1.4624	3.9947	1.6742	1.3157	1.9024	1.8894
1223	dienelactone hydrolase family protein [Synechococcus sp. PCC 7002]	gi|170079354	27 kDa	5.8498	5.5925	7.5337	7.8941	2.8536	5.6681
1224	UbiE/COQ5 family methyltransferase [Synechococcus sp. PCC 7002]	gi|170077439	24 kDa	2.9249	2.3968	4.1854	1.3157	3.8048	0.94469
1225	ParA, plasmid partitioning protein [Synechococcus sp. PCC 7002]	gi|170076471	21 kDa	0	1.5979	0.83708	0	1.9024	2.8341
1226	hypothetical protein SYNPCC7002_A0464 [Synechococcus sp. PCC 7002]	gi|170077090	29 kDa	0	3.1957	2.5112	1.3157	1.9024	0.94469
1227	gamma-glutamyltranspeptidase precursor [Synechococcus sp. PCC 7002]	gi|170076604	54 kDa	1.4624	0.79893	2.5112	0	0	0
1228	UDP-N-acetylmuramate--L-alanine ligase [Synechococcus sp. PCC 7002]	gi|170076738	52 kDa	5.8498	5.5925	4.1854	2.6314	5.7072	5.6681
1229	CAB/ELIP/HLIP superfamily protein [Synechococcus sp. PCC 7002]	gi|170077227	8 kDa	5.8498	5.5925	5.8596	1.3157	2.8536	5.6681
1230	hypothetical protein SYNPCC7002_A1167 [Synechococcus sp. PCC 7002]	gi|170077784	58 kDa	0	5.5925	4.1854	3.9471	2.8536	2.8341
1231	UDP-N-acetylmuramyl tripeptide synthase [Synechococcus sp. PCC 7002]	gi|170077496	48 kDa	2.9249	3.9947	3.3483	0	2.8536	1.8894
1232	hypothetical protein SYNPCC7002_A0152 [Synechococcus sp. PCC 7002]	gi|170076784	17 kDa	2.9249	2.3968	0.83708	0	0.9512	0.94469
1233	hypothetical protein SYNPCC7002_A1540 [Synechococcus sp. PCC 7002]	gi|170078149	25 kDa	1.4624	3.1957	2.5112	3.9471	4.756	6.6128
1234	L-aspartate oxidase [Synechococcus sp. PCC 7002]	gi|170076929	61 kDa	1.4624	0.79893	0.83708	0	1.9024	0
1235	hypothetical protein SYNPCC7002_A0701 [Synechococcus sp. PCC 7002]	gi|170077324	40 kDa	1.4624	0.79893	1.6742	0	1.9024	0.94469
1236	hypothetical protein SYNPCC7002_A0062 [Synechococcus sp. PCC 7002]	gi|170076697	21 kDa	4.3873	4.7936	4.1854	1.3157	0	0.94469
1237	carbon dioxide concentrating mechanism protein [Synechococcus sp. PCC 7002]	gi|170078407	11 kDa	10.237	6.3915	5.8596	11.841	8.5608	10.392
1238	membrane-associated zinc-dependent metalloprotease [Synechococcus sp. PCC 7002]	gi|170077217	39 kDa	11.7	7.1904	3.3483	3.9471	6.6584	4.7234
1239	hypothetical protein SYNPCC7002_A2346 [Synechococcus sp. PCC 7002]	gi|170078941	13 kDa	7.3122	7.9893	10.045	3.9471	7.6096	9.4469
1240	AcrB/AcrD/AcrF family protein [Synechococcus sp. PCC 7002]	gi|170079222	108 kDa	2.9249	0	0	0	0	0
1241	mannose-1-phosphate guanylyltransferase [Synechococcus sp. PCC 7002]	gi|170078163	38 kDa	4.3873	3.1957	5.0225	3.9471	2.8536	3.7788
1242	hypothetical protein SYNPCC7002_A1897 [Synechococcus sp. PCC 7002]	gi|170078502	29 kDa	7.3122	5.5925	3.3483	5.2628	9.512	5.6681
1243	single-stranded DNA-binding protein [Synechococcus sp. PCC 7002]	gi|170077786	16 kDa	4.3873	4.7936	6.6966	3.9471	5.7072	6.6128
1244	hypothetical protein SYNPCC7002_A1767 [Synechococcus sp. PCC 7002]	gi|170078374	17 kDa	2.9249	2.3968	1.6742	2.6314	2.8536	3.7788
1245	tRNA (guanine-N(7)-)-methyltransferase [Synechococcus sp. PCC 7002]	gi|170077525	25 kDa	1.4624	1.5979	0.83708	2.6314	2.8536	2.8341
1246	anti-anti-sigma factor [Synechococcus sp. PCC 7002]	gi|170077903	12 kDa	1.4624	2.3968	3.3483	1.3157	3.8048	3.7788
1247	putative PmbA/TldD family protein [Synechococcus sp. PCC 7002]	gi|170077818	46 kDa	0	0	2.5112	0	0	0
1248	hypothetical protein SYNPCC7002_A1207 [Synechococcus sp. PCC 7002]	gi|170077824	17 kDa	4.3873	2.3968	5.8596	0	2.8536	3.7788
1249	hypothetical protein SYNPCC7002_F0060 [Synechococcus sp. PCC 7002]	gi|170079613	15 kDa	0	4.7936	5.8596	0	0.9512	0
1250	low molecular weight phosphotyrosine protein phosphatase [Synechococcus sp. PCC 7002]	gi|170077594	18 kDa	1.4624	3.9947	1.6742	0	2.8536	4.7234
1251	NAD-dependent epimerase/dehydratase family protein [Synechococcus sp. PCC 7002]	gi|170077999	24 kDa	13.162	7.9893	5.8596	10.526	9.512	7.5575
1252	NADH dehydrogenase subunit J [Synechococcus sp. PCC 7002]	gi|170077546	22 kDa	5.8498	2.3968	1.6742	3.9471	3.8048	3.7788
1253	hypothetical protein SYNPCC7002_A1956 [Synechococcus sp. PCC 7002]	gi|170078561	22 kDa	2.9249	3.9947	0.83708	2.6314	2.8536	6.6128
1254	glucose/sorbosone dehydrogenase [Synechococcus sp. PCC 7002]	gi|170078019	46 kDa	2.9249	5.5925	8.3708	1.3157	0	2.8341
1255	hypothetical protein SYNPCC7002_A1755 [Synechococcus sp. PCC 7002]	gi|170078362	24 kDa	0	1.5979	2.5112	0	0.9512	0.94469
1256	unnamed protein product [Synechococcus sp. PCC 7002]	gi|38965	45 kDa	0	0	0	0	1.9024	2.8341
1257	hypothetical protein SYNPCC7002_F0062 [Synechococcus sp. PCC 7002]	gi|170079615	18 kDa	0	3.9947	2.5112	0	0	0
1258	30S ribosomal protein S20 [Synechococcus sp. PCC 7002]	gi|170078652	11 kDa	1.4624	5.5925	7.5337	10.526	4.756	9.4469
1259	imidazole glycerol phosphate synthase subunit HisH [Synechococcus sp. PCC 7002]	gi|170079123	23 kDa	0	1.5979	5.0225	0	0.9512	1.8894
1260	hypothetical protein SYNPCC7002_A0745 [Synechococcus sp. PCC 7002]	gi|170077368	14 kDa	1.4624	1.5979	3.3483	1.3157	0.9512	0.94469
1261	cytochrome b6/f complex, alternative iron-sulfur subunit [Synechococcus sp. PCC 7002]	gi|170077717	16 kDa	5.8498	3.9947	3.3483	17.104	8.5608	9.4469
1262	PhoH-like protein [Synechococcus sp. PCC 7002]	gi|170077560	38 kDa	2.9249	2.3968	1.6742	1.3157	1.9024	1.8894
1263	imidazoleglycerol-phosphate dehydratase [Synechococcus sp. PCC 7002]	gi|170078589	22 kDa	4.3873	1.5979	3.3483	2.6314	4.756	4.7234
1264	hypothetical protein SYNPCC7002_A0079 [Synechococcus sp. PCC 7002]	gi|170076714	13 kDa	4.3873	3.1957	5.0225	2.6314	2.8536	3.7788
1265	hypothetical protein SYNPCC7002_G0135 [Synechococcus sp. PCC 7002]	gi|170076605	38 kDa	0	2.3968	0.83708	0	0	0
1266	surface protein SdrI [Synechococcus sp. PCC 7002]	gi|170077920	100 kDa	1.4624	4.7936	8.3708	1.3157	2.8536	5.6681
1267	rRNA methyltransferase [Synechococcus sp. PCC 7002]	gi|170076970	27 kDa	0	0.79893	0.83708	0	0.9512	1.8894
1268	hypothetical protein SYNPCC7002_A1712 [Synechococcus sp. PCC 7002]	gi|170078319	15 kDa	1.4624	4.7936	6.6966	0	0	0
1269	2-hydroxyhepta-2,4-diene-1,7-dioate isomerase [Synechococcus sp. PCC 7002]	gi|170077070	29 kDa	4.3873	4.7936	5.8596	2.6314	4.756	5.6681
1270	photosystem I reaction center subunit XI [Synechococcus sp. PCC 7002]	gi|170079214	16 kDa	8.7747	7.1904	6.6966	10.526	10.463	11.336
1271	pterin-4a-carbinolamine dehydratase [Synechococcus sp. PCC 7002]	gi|170079398	11 kDa	7.3122	7.9893	10.045	5.2628	8.5608	6.6128
1272	ArsR family transcriptional regulator [Synechococcus sp. PCC 7002]	gi|170076686	13 kDa	4.3873	2.3968	6.6966	5.2628	2.8536	4.7234
1273	hypothetical protein SYNPCC7002_A0219 [Synechococcus sp. PCC 7002]	gi|170076850	19 kDa	2.9249	4.7936	5.8596	2.6314	1.9024	4.7234
1274	hypothetical protein SYNPCC7002_A1582 [Synechococcus sp. PCC 7002]	gi|170078191	16 kDa	11.7	5.5925	9.2079	9.2098	8.5608	6.6128
1275	hypothetical protein SYNPCC7002_A0449 [Synechococcus sp. PCC 7002]	gi|170077075	23 kDa	2.9249	1.5979	3.3483	1.3157	0.9512	0.94469
1276	ATLS1-like light-inducible protein [Synechococcus sp. PCC 7002]	gi|170077192	13 kDa	2.9249	2.3968	3.3483	2.6314	3.8048	1.8894
1277	rod shape-determining protein MreC [Synechococcus sp. PCC 7002]	gi|170078135	29 kDa	4.3873	3.9947	2.5112	0	1.9024	1.8894
1278	1-acyl-sn-glycerol-3-phosphate acyltransferase [Synechococcus sp. PCC 7002]	gi|170077540	33 kDa	2.9249	0.79893	0	0	0.9512	0.94469
1279	hypothetical protein SYNPCC7002_A2615 [Synechococcus sp. PCC 7002]	gi|170079209	40 kDa	0	1.5979	3.3483	1.3157	0	0
1280	hypothetical protein SYNPCC7002_A1742 [Synechococcus sp. PCC 7002]	gi|170078349	39 kDa	0	0.79893	1.6742	0	0.9512	0.94469
1281	hypothetical protein SYNPCC7002_A2616 [Synechococcus sp. PCC 7002]	gi|170079210	41 kDa	0	1.5979	2.5112	0	0	0
1282	cation-transporting ATPase [Synechococcus sp. PCC 7002]	gi|170078913	80 kDa	20.474	7.1904	2.5112	0	3.8048	1.8894
1283	hypothetical protein SYNPCC7002_D0023 [Synechococcus sp. PCC 7002]	gi|170079505	36 kDa	1.4624	1.5979	2.5112	1.3157	2.8536	4.7234
1284	mechanosensitive ion channel family protein [Synechococcus sp. PCC 7002]	gi|170079330	46 kDa	1.4624	1.5979	1.6742	2.6314	0.9512	0.94469
1285	hypothetical protein SYNPCC7002_A1541 [Synechococcus sp. PCC 7002]	gi|170078150	15 kDa	2.9249	3.1957	4.1854	2.6314	2.8536	3.7788
1286	hypothetical protein SYNPCC7002_A0673 [Synechococcus sp. PCC 7002]	gi|170077296	9 kDa	2.9249	4.7936	3.3483	3.9471	2.8536	2.8341
1287	ABC transporter ATP-binding protein [Synechococcus sp. PCC 7002]	gi|170078821	37 kDa	7.3122	3.1957	1.6742	0	0.9512	1.8894
1288	molybdopterin converting factor, chain 2 [Synechococcus sp. PCC 7002]	gi|170078297	17 kDa	2.9249	2.3968	4.1854	1.3157	2.8536	2.8341
1289	methyltransferase [Synechococcus sp. PCC 7002]	gi|170076656	20 kDa	0	0.79893	0	0	1.9024	0
1290	bicarbonate transporter, BicA [Synechococcus sp. PCC 7002]	gi|170078966	60 kDa	0	3.9947	0	0	1.9024	1.8894
1291	Sodium/hydrogen exchanger family protein [Synechococcus sp. PCC 7002]	gi|170076911	74 kDa	0	1.5979	0	0	0	1.8894
1292	hypothetical protein SYNPCC7002_A0758 [Synechococcus sp. PCC 7002]	gi|170077381	41 kDa	8.7747	10.386	5.0225	6.5785	9.512	7.5575
1293	branched-chain amino acid ABC transporter ATPase [Synechococcus sp. PCC 7002]	gi|170078045	28 kDa	7.3122	3.1957	1.6742	5.2628	3.8048	4.7234
1294	hypothetical protein SYNPCC7002_A0687 [Synechococcus sp. PCC 7002]	gi|170077310	19 kDa	4.3873	3.1957	4.1854	3.9471	1.9024	2.8341
1295	hypothetical protein SYNPCC7002_A1618 [Synechococcus sp. PCC 7002]	gi|170078226	39 kDa	1.4624	5.5925	5.0225	1.3157	3.8048	3.7788
1296	carbohydrate esterase family 1 protein [Synechococcus sp. PCC 7002]	gi|170077306	34 kDa	2.9249	0.79893	1.6742	1.3157	2.8536	0.94469
1297	hypothetical protein SYNPCC7002_A1717 [Synechococcus sp. PCC 7002]	gi|170078324	20 kDa	1.4624	3.1957	8.3708	1.3157	1.9024	2.8341
1298	segregation and condensation protein B [Synechococcus sp. PCC 7002]	gi|170079068	18 kDa	0	3.1957	5.0225	2.6314	2.8536	4.7234
1299	putative cobalt transport protein [Synechococcus sp. PCC 7002]	gi|170078747	33 kDa	1.4624	1.5979	0	1.3157	0.9512	0.94469
1300	hypothetical protein SYNPCC7002_A2204 [Synechococcus sp. PCC 7002]	gi|170078802	22 kDa	1.4624	1.5979	0	0	0	0.94469
1301	arginase/agmatinase family protein [Synechococcus sp. PCC 7002]	gi|170078358	43 kDa	0	0	0	0	0	2.8341
1302	hypothetical protein SYNPCC7002_A2660 [Synechococcus sp. PCC 7002]	gi|170079254	38 kDa	2.9249	0	0	0	0	0
1303	hypothetical protein SYNPCC7002_A0482 [Synechococcus sp. PCC 7002]	gi|170077108	18 kDa	8.7747	4.7936	5.8596	10.526	4.756	5.6681
1304	iojap-like protein [Synechococcus sp. PCC 7002]	gi|170077494	15 kDa	2.9249	2.3968	3.3483	1.3157	1.9024	2.8341
1305	branched chain amino acid ABC transporter substrate-binding protein [Synechococcus sp. PCC 7002]	gi|170078443	41 kDa	7.3122	7.1904	5.0225	5.2628	5.7072	8.5022
1306	pyridoxine 5'-phosphate synthase [Synechococcus sp. PCC 7002]	gi|170076728	27 kDa	2.9249	3.1957	2.5112	5.2628	1.9024	4.7234
1307	DnaJ domain-containing protein [Synechococcus sp. PCC 7002]	gi|170077554	22 kDa	1.4624	5.5925	2.5112	1.3157	4.756	1.8894
1308	hypothetical protein SYNPCC7002_A1917 [Synechococcus sp. PCC 7002]	gi|170078522	25 kDa	2.9249	4.7936	7.5337	3.9471	4.756	0.94469
1309	Maf-like protein [Synechococcus sp. PCC 7002]	gi|170077919	21 kDa	2.9249	5.5925	3.3483	3.9471	3.8048	1.8894
1310	hypothetical protein SYNPCC7002_G0156 [Synechococcus sp. PCC 7002]	gi|170076626	19 kDa	5.8498	3.1957	2.5112	2.6314	4.756	3.7788
1311	GDP-fucose synthetase [Synechococcus sp. PCC 7002]	gi|170079418	34 kDa	2.9249	3.1957	5.0225	0	4.756	5.6681
1312	putative two component system response regulator [Synechococcus sp. PCC 7002]	gi|170077989	45 kDa	4.3873	0	0	0	2.8536	0
1313	formyltetrahydrofolate deformylase [Synechococcus sp. PCC 7002]	gi|170077627	32 kDa	2.9249	3.1957	0.83708	0	1.9024	3.7788
1314	RuBisCO operon transcription regulator [Synechococcus sp. PCC 7002]	gi|170076803	35 kDa	0	2.3968	0.83708	0	0.9512	0.94469
1315	recombination protein F [Synechococcus sp. PCC 7002]	gi|170078873	44 kDa	1.4624	1.5979	0.83708	0	0	0.94469
1316	hypothetical protein SYNPCC7002_A1982 [Synechococcus sp. PCC 7002]	gi|170078586	16 kDa	5.8498	3.9947	2.5112	3.9471	4.756	4.7234
1317	hypothetical protein SYNPCC7002_A2085 [Synechococcus sp. PCC 7002]	gi|170078687	10 kDa	2.9249	1.5979	4.1854	2.6314	0.9512	3.7788
1318	receptor ligand binding family protein [Synechococcus sp. PCC 7002]	gi|170079336	49 kDa	4.3873	3.1957	2.5112	2.6314	0.9512	2.8341
1319	hypothetical protein SYNPCC7002_A1600 [Synechococcus sp. PCC 7002]	gi|170078208	58 kDa	1.4624	3.1957	3.3483	1.3157	1.9024	1.8894
1320	GNAT family acetyltransferase [Synechococcus sp. PCC 7002]	gi|170079031	31 kDa	4.3873	2.3968	0	1.3157	2.8536	1.8894
1321	tRNA pseudouridine synthase B [Synechococcus sp. PCC 7002]	gi|170077110	34 kDa	0	3.9947	2.5112	0	3.8048	4.7234
1322	LexA repressor [Synechococcus sp. PCC 7002]	gi|170078455	23 kDa	0	0.79893	3.3483	1.3157	1.9024	0.94469
1323	hypothetical protein SYNPCC7002_A0532 [Synechococcus sp. PCC 7002]	gi|170077157	22 kDa	0	0.79893	4.1854	3.9471	1.9024	0.94469
1324	hypothetical protein SYNPCC7002_A2678 [Synechococcus sp. PCC 7002]	gi|170079271	60 kDa	7.3122	6.3915	10.045	1.3157	4.756	4.7234
1325	two-component response regulator, OmpR subfamily protein [Synechococcus sp. PCC 7002]	gi|170077473	29 kDa	1.4624	0.79893	1.6742	0	0.9512	1.8894
1326	hypothetical protein SYNPCC7002_A0822 [Synechococcus sp. PCC 7002]	gi|170077444	15 kDa	0	2.3968	0.83708	1.3157	0.9512	2.8341
1327	beta-lactamase [Synechococcus sp. PCC 7002]	gi|170077878	42 kDa	0	0.79893	1.6742	0	0	0
1328	pentapeptide repeat-containing protein [Synechococcus sp. PCC 7002]	gi|170079610	42 kDa	0	3.1957	0	0	0	0
1329	succinyldiaminopimelate transaminase [Synechococcus sp. PCC 7002]	gi|170076920	42 kDa	4.3873	3.1957	2.5112	2.6314	3.8048	2.8341
1330	hypothetical protein SYNPCC7002_A0564 [Synechococcus sp. PCC 7002]	gi|170077189	36 kDa	11.7	6.3915	5.0225	7.8941	4.756	5.6681
1331	guanylate kinase [Synechococcus sp. PCC 7002]	gi|170078452	21 kDa	0	1.5979	1.6742	1.3157	1.9024	3.7788
1332	O-methyltransferase [Synechococcus sp. PCC 7002]	gi|170077388	24 kDa	1.4624	0.79893	3.3483	3.9471	2.8536	1.8894
1333	competence/damage-inducible CinA-like protein [Synechococcus sp. PCC 7002]	gi|170079119	45 kDa	0	1.5979	2.5112	0	1.9024	0.94469
1334	glutamate racemase [Synechococcus sp. PCC 7002]	gi|170077204	31 kDa	1.4624	0.79893	1.6742	0	3.8048	1.8894
1335	beta-hydroxyacyl-(acyl-carrier-protein) dehydratase FabZ [Synechococcus sp. PCC 7002]	gi|170076705	17 kDa	1.4624	5.5925	0	1.3157	2.8536	5.6681
1336	CheY subfamily protein [Synechococcus sp. PCC 7002]	gi|170079195	14 kDa	0	2.3968	1.6742	0	0	0
1337	hypothetical protein SYNPCC7002_A2632 [Synechococcus sp. PCC 7002]	gi|170079226	36 kDa	2.9249	3.1957	0.83708	0	2.8536	1.8894
1338	pyridoxamine 5'-phosphate oxidase [Synechococcus sp. PCC 7002]	gi|170079090	20 kDa	2.9249	0.79893	6.6966	0	0	1.8894
1339	small-conductance mechanosensitive ion channel [Synechococcus sp. PCC 7002]	gi|170077092	33 kDa	0	2.3968	1.6742	0	1.9024	0.94469
1340	hypothetical protein SYNPCC7002_A2830 [Synechococcus sp. PCC 7002]	gi|170079416	39 kDa	4.3873	3.1957	1.6742	1.3157	3.8048	2.8341
1341	hypothetical protein SYNPCC7002_A2025 [Synechococcus sp. PCC 7002]	gi|170078629	23 kDa	4.3873	3.9947	5.0225	5.2628	5.7072	5.6681
1342	NADH dehydrogenase subunit H [Synechococcus sp. PCC 7002]	gi|170077548	41 kDa	13.162	7.9893	5.0225	2.6314	8.5608	5.6681
1343	16S rRNA methyltransferase GidB [Synechococcus sp. PCC 7002]	gi|170077371	28 kDa	4.3873	4.7936	3.3483	2.6314	2.8536	3.7788
1344	malate dehydrogenase [Synechococcus sp. PCC 7002]	gi|170078694	34 kDa	1.4624	4.7936	4.1854	1.3157	3.8048	3.7788
1345	S-adenosyl-methyltransferase [Synechococcus sp. PCC 7002]	gi|170078284	33 kDa	0	0	0.83708	0	1.9024	0.94469
1346	anthranilate synthase component II [Synechococcus sp. PCC 7002]	gi|170078369	22 kDa	5.8498	5.5925	10.882	5.2628	5.7072	7.5575
1347	HTH containing protein [Synechococcus sp. PCC 7002]	gi|170078488	10 kDa	1.4624	3.1957	2.5112	1.3157	2.8536	2.8341
1348	hypothetical protein SYNPCC7002_A2095 [Synechococcus sp. PCC 7002]	gi|170078696	22 kDa	1.4624	2.3968	4.1854	2.6314	2.8536	2.8341
1349	hypothetical protein SYNPCC7002_A2251 [Synechococcus sp. PCC 7002]	gi|170078847	10 kDa	1.4624	3.9947	5.8596	6.5785	2.8536	4.7234
1350	hypothetical protein SYNPCC7002_A0800 [Synechococcus sp. PCC 7002]	gi|170077422	30 kDa	2.9249	3.1957	1.6742	1.3157	0	1.8894
1351	phosphoribosylformylglycinamidine synthase, PurS protein [Synechococcus sp. PCC 7002]	gi|170078155	9 kDa	1.4624	4.7936	5.0225	2.6314	3.8048	6.6128
1352	hypothetical protein SYNPCC7002_A2143 [Synechococcus sp. PCC 7002]	gi|170078741	19 kDa	5.8498	5.5925	3.3483	2.6314	5.7072	3.7788
1353	hypothetical protein SYNPCC7002_A1580 [Synechococcus sp. PCC 7002]	gi|170078189	25 kDa	2.9249	3.9947	4.1854	1.3157	1.9024	3.7788
1354	hypothetical protein SYNPCC7002_A2269 [Synechococcus sp. PCC 7002]	gi|170078865	38 kDa	4.3873	3.9947	1.6742	1.3157	2.8536	4.7234
1355	UDP-N-acetylglucosamine--N-acetylmuramyl- (pentapeptide) pyrophosphoryl-UDP N- acetylglucosamine transferase [Synechococcus sp. PCC 7002]	gi|170079178	38 kDa	1.4624	3.1957	0.83708	2.6314	0.9512	2.8341
1356	F0F1 ATP synthase subunit A [Synechococcus sp. PCC 7002]	gi|170077362	27 kDa	8.7747	7.9893	4.1854	10.526	4.756	6.6128
1357	GrxC family glutaredoxin [Synechococcus sp. PCC 7002]	gi|170076910	10 kDa	2.9249	3.1957	4.1854	2.6314	2.8536	2.8341
1358	cytochrome b559 subunit alpha [Synechococcus sp. PCC 7002]	gi|170076860	9 kDa	4.3873	3.9947	5.8596	7.8941	5.7072	5.6681
1359	amidohydrolase [Synechococcus sp. PCC 7002]	gi|170078997	44 kDa	1.4624	2.3968	0.83708	1.3157	0.9512	1.8894
1360	protochlorophyllide reductase iron-sulfur ATP-binding protein [Synechococcus sp. PCC 7002]	gi|170078942	31 kDa	0	0.79893	0	0	4.756	5.6681
1361	hypothetical protein SYNPCC7002_A2492 [Synechococcus sp. PCC 7002]	gi|170079087	20 kDa	0	6.3915	6.6966	0	0	0.94469
1362	hypothetical protein SYNPCC7002_A2483 [Synechococcus sp. PCC 7002]	gi|170079078	51 kDa	1.4624	2.3968	0	0	2.8536	1.8894
1363	two-component hybrid sensor and regulator [Synechococcus sp. PCC 7002]	gi|170076923	44 kDa	0	1.5979	0.83708	0	0.9512	0
1364	hypothetical protein SYNPCC7002_A1012 [Synechococcus sp. PCC 7002]	gi|170077633	16 kDa	4.3873	3.1957	1.6742	2.6314	1.9024	2.8341
1365	M23 peptidase domain-containing protein [Synechococcus sp. PCC 7002]	gi|170079150	21 kDa	1.4624	2.3968	1.6742	3.9471	5.7072	4.7234
1366	precorrin-8X methylmutase [Synechococcus sp. PCC 7002]	gi|170077153	23 kDa	0	1.5979	2.5112	0	2.8536	0.94469
1367	two-component response regulator; transcriptional regulatory protein [Synechococcus sp. PCC 7002]	gi|170076628	26 kDa	1.4624	3.1957	4.1854	6.5785	4.756	1.8894
1368	plasmid partitioning protein ParA [Synechococcus sp. PCC 7002]	gi|170079554	23 kDa	2.9249	2.3968	0.83708	0	2.8536	2.8341
1369	HesB-like domain-containing protein [Synechococcus sp. PCC 7002]	gi|170078669	12 kDa	1.4624	3.1957	0.83708	3.9471	1.9024	3.7788
1370	hypothetical protein SYNPCC7002_A1084 [Synechococcus sp. PCC 7002]	gi|170077704	16 kDa	0	1.5979	0	0	0.9512	0
1371	ferredoxin 2Fe-2S [Synechococcus sp. PCC 7002]	gi|170078790	12 kDa	0	0.79893	7.5337	0	3.8048	2.8341
1372	3-isopropylmalate dehydratase small subunit [Synechococcus sp. PCC 7002]	gi|170077082	21 kDa	4.3873	3.9947	4.1854	5.2628	4.756	3.7788
1373	hypothetical protein SYNPCC7002_A2159 [Synechococcus sp. PCC 7002]	gi|170078757	32 kDa	2.9249	2.3968	6.6966	2.6314	2.8536	3.7788
1374	hypothetical protein SYNPCC7002_A2676 [Synechococcus sp. PCC 7002]	gi|170079269	32 kDa	2.9249	2.3968	0.83708	1.3157	3.8048	2.8341
1375	CAAX amino protease [Synechococcus sp. PCC 7002]	gi|170076903	56 kDa	2.9249	3.9947	0.83708	0	5.7072	1.8894
1376	hypothetical protein SYNPCC7002_A0465 [Synechococcus sp. PCC 7002]	gi|170077091	35 kDa	4.3873	3.1957	1.6742	2.6314	3.8048	2.8341
1377	hypothetical protein SYNPCC7002_A2708 [Synechococcus sp. PCC 7002]	gi|170079301	39 kDa	1.4624	2.3968	1.6742	1.3157	1.9024	0.94469
1378	glycerophosphoryl diester phosphodiesterase [Synechococcus sp. PCC 7002]	gi|170079424	34 kDa	1.4624	1.5979	0.83708	1.3157	0.9512	0.94469
1379	RNA polymerase sigma factor RpoE [Synechococcus sp. PCC 7002]	gi|170078575	25 kDa	0	0.79893	0	2.6314	0.9512	2.8341
1380	AhpC/TSA family protein [Synechococcus sp. PCC 7002]	gi|170076742	21 kDa	1.4624	1.5979	2.5112	1.3157	0.9512	0.94469
1381	hypothetical protein SYNPCC7002_A2006 [Synechococcus sp. PCC 7002]	gi|170078610	15 kDa	0	2.3968	0.83708	1.3157	3.8048	7.5575
1382	Alkyl hydroperoxide reductase; peroxiredoxin [Synechococcus sp. PCC 7002]	gi|170077183	22 kDa	2.9249	0.79893	4.1854	1.3157	2.8536	1.8894
1383	hypothetical protein SYNPCC7002_A0298 [Synechococcus sp. PCC 7002]	gi|170076926	6 kDa	7.3122	4.7936	5.8596	7.8941	5.7072	7.5575
1384	transaldolase [Synechococcus sp. PCC 7002]	gi|170079152	22 kDa	4.3873	4.7936	6.6966	2.6314	4.756	3.7788
1385	hypothetical protein SYNPCC7002_A0892 [Synechococcus sp. PCC 7002]	gi|170077514	24 kDa	2.9249	3.9947	5.8596	2.6314	2.8536	2.8341
1386	hypothetical protein SYNPCC7002_A0208 [Synechococcus sp. PCC 7002]	gi|170076839	12 kDa	4.3873	4.7936	0.83708	2.6314	0.9512	2.8341
1387	2,3-diketo-5-methylthio-1-phosphopentane phosphatase [Synechococcus sp. PCC 7002]	gi|170077177	25 kDa	0	0.79893	2.5112	1.3157	0.9512	0.94469
1388	plasmid partitioning protein [Synechococcus sp. PCC 7002]	gi|170076472	28 kDa	0	0.79893	1.6742	3.9471	1.9024	3.7788
1389	hypothetical protein SYNPCC7002_A0604 [Synechococcus sp. PCC 7002]	gi|170077229	19 kDa	2.9249	1.5979	3.3483	2.6314	2.8536	4.7234
1390	bifunctional riboflavin kinase/FMN adenylyltransferase [Synechococcus sp. PCC 7002]	gi|170078993	36 kDa	0	1.5979	1.6742	0	0	0
1391	hypothetical protein SYNPCC7002_A2480 [Synechococcus sp. PCC 7002]	gi|170079075	14 kDa	0	1.5979	2.5112	2.6314	0	0
1392	periplasmic binding protein, iron compound transporter [Synechococcus sp. PCC 7002]	gi|170076609	37 kDa	17.549	5.5925	5.8596	0	0	0
1393	hypothetical protein SYNPCC7002_A0455 [Synechococcus sp. PCC 7002]	gi|170077081	13 kDa	2.9249	3.1957	5.0225	3.9471	4.756	2.8341
1394	hypothetical protein SYNPCC7002_A0299 [Synechococcus sp. PCC 7002]	gi|170076927	26 kDa	5.8498	3.1957	3.3483	5.2628	2.8536	4.7234
1395	HAD family hydrolase [Synechococcus sp. PCC 7002]	gi|170077509	31 kDa	1.4624	0.79893	3.3483	1.3157	1.9024	2.8341
1396	two-component response regulator [Synechococcus sp. PCC 7002]	gi|170078560	27 kDa	2.9249	1.5979	3.3483	2.6314	2.8536	2.8341
1397	glycoside hydrolase family protein [Synechococcus sp. PCC 7002]	gi|170078581	46 kDa	1.4624	1.5979	0	2.6314	0	0.94469
1398	dihydroorotase [Synechococcus sp. PCC 7002]	gi|170078674	46 kDa	0	1.5979	1.6742	0	0.9512	0.94469
1399	Chain A, Crystal Structure Of Cytochrome C6 Q57v Mutant From Synechococcus Sp. Pcc 7002	gi|478247255	9 kDa	0	4.7936	6.6966	3.9471	7.6096	5.6681
1400	hypothetical protein SYNPCC7002_A2386 [Synechococcus sp. PCC 7002]	gi|170078981	11 kDa	0	2.3968	0.83708	0	1.9024	7.5575
1401	PhzF family phenazine biosynthesis protein [Synechococcus sp. PCC 7002]	gi|170076674	33 kDa	7.3122	5.5925	4.1854	6.5785	6.6584	5.6681
1402	orotidine 5'-phosphate decarboxylase [Synechococcus sp. PCC 7002]	gi|170077172	24 kDa	5.8498	6.3915	7.5337	7.8941	4.756	5.6681
1403	ABC-type transport protein [Synechococcus sp. PCC 7002]	gi|170077392	28 kDa	2.9249	3.1957	0.83708	1.3157	1.9024	2.8341
1404	hypothetical protein SYNPCC7002_A1075 [Synechococcus sp. PCC 7002]	gi|170077695	22 kDa	1.4624	3.1957	4.1854	2.6314	3.8048	5.6681
1405	ABC transporter family protein [Synechococcus sp. PCC 7002]	gi|170079320	24 kDa	1.4624	1.5979	2.5112	1.3157	1.9024	1.8894
1406	hypothetical protein SYNPCC7002_A1666 [Synechococcus sp. PCC 7002]	gi|170078273	21 kDa	1.4624	0.79893	1.6742	0	0.9512	0.94469
1407	hypothetical protein SYNPCC7002_A2576 [Synechococcus sp. PCC 7002]	gi|170079170	13 kDa	1.4624	1.5979	3.3483	3.9471	3.8048	1.8894
1408	hypothetical protein SYNPCC7002_A1210 [Synechococcus sp. PCC 7002]	gi|170077826	53 kDa	0	0	0.83708	0	0	1.8894
1409	hypothetical protein SYNPCC7002_A0151 [Synechococcus sp. PCC 7002]	gi|170076783	56 kDa	0	1.5979	1.6742	0	0.9512	2.8341
1410	uroporphyrin-III synthase/methyltransferase [Synechococcus sp. PCC 7002]	gi|170077809	55 kDa	0	3.9947	2.5112	0	3.8048	3.7788
1411	hypothetical protein SYNPCC7002_A0305 [Synechococcus sp. PCC 7002]	gi|170076933	17 kDa	0	3.9947	0	0	2.8536	2.8341
1412	glyoxalase family protein family [Synechococcus sp. PCC 7002]	gi|170076552	13 kDa	10.237	7.1904	10.882	0	0	0
1413	PilT domain-containing protein [Synechococcus sp. PCC 7002]	gi|170078423	16 kDa	1.4624	0.79893	2.5112	1.3157	2.8536	1.8894
1414	hypothetical protein SYNPCC7002_A2448 [Synechococcus sp. PCC 7002]	gi|170079043	15 kDa	11.7	7.9893	6.6966	7.8941	7.6096	8.5022
1415	hypothetical protein SYNPCC7002_A2874 [Synechococcus sp. PCC 7002]	gi|170079459	18 kDa	0	1.5979	5.0225	2.6314	3.8048	2.8341
1416	esterase/lipase [Synechococcus sp. PCC 7002]	gi|170076488	36 kDa	0	1.5979	0.83708	0	0	0
1417	orf153 3' of petH - Synechococcus sp. (PCC 7002)	gi|282202	18 kDa	2.9249	0.79893	2.5112	1.3157	0	0
1418	hypothetical protein SYNPCC7002_A0312 [Synechococcus sp. PCC 7002]	gi|170076940	15 kDa	0	3.1957	1.6742	0	0	1.8894
1419	1-acyl-sn-glycerol-3-phosphate acyltransferase [Synechococcus sp. PCC 7002]	gi|170078991	24 kDa	0	3.9947	2.5112	0	0.9512	1.8894
1420	Ap4A phosphorylase II [Synechococcus sp. PCC 7002]	gi|170079149	35 kDa	1.4624	1.5979	4.1854	0	1.9024	0.94469
1421	membrane-fusion protein [Synechococcus sp. PCC 7002]	gi|170078070	49 kDa	5.8498	3.1957	0.83708	1.3157	1.9024	2.8341
1422	3-methyl-2-oxobutanoate hydroxymethyltransferase [Synechococcus sp. PCC 7002]	gi|170078435	28 kDa	1.4624	3.1957	0.83708	1.3157	2.8536	2.8341
1423	hypothetical protein SYNPCC7002_A2224 [Synechococcus sp. PCC 7002]	gi|170078822	62 kDa	2.9249	0	0	0	0	0
1424	hypothetical protein SYNPCC7002_A2777 [Synechococcus sp. PCC 7002]	gi|170079368	17 kDa	2.9249	3.9947	5.8596	7.8941	3.8048	5.6681
1425	hypothetical protein SYNPCC7002_A0163 [Synechococcus sp. PCC 7002]	gi|170076795	27 kDa	1.4624	3.1957	0.83708	0	0.9512	1.8894
1426	putative translation initiation factor SUI1 [Synechococcus sp. PCC 7002]	gi|170078548	12 kDa	1.4624	2.3968	3.3483	3.9471	2.8536	1.8894
1427	carbon dioxide concentrating mechanism protein [Synechococcus sp. PCC 7002]	gi|170079206	11 kDa	2.9249	3.1957	5.0225	3.9471	3.8048	4.7234
1428	undecaprenyl diphosphate synthase [Synechococcus sp. PCC 7002]	gi|170076733	28 kDa	1.4624	2.3968	1.6742	0	2.8536	0.94469
1429	glyoxalase family protein [Synechococcus sp. PCC 7002]	gi|170079303	39 kDa	0	0.79893	1.6742	0	0	0
1430	hypothetical protein SYNPCC7002_A0895 [Synechococcus sp. PCC 7002]	gi|170077517	26 kDa	1.4624	0.79893	1.6742	0	1.9024	2.8341
1431	sulfate-binding protein [Synechococcus sp. PCC 7002]	gi|170077417	38 kDa	17.549	2.3968	0.83708	0	2.8536	1.8894
1432	tRNA modification GTPase TrmE [Synechococcus sp. PCC 7002]	gi|170077787	49 kDa	2.9249	4.7936	0.83708	0	0.9512	0
1433	glycosyl hydrolase family protein [Synechococcus sp. PCC 7002]	gi|170076710	58 kDa	1.4624	1.5979	0	0	1.9024	0.94469
1434	hypothetical protein SYNPCC7002_A1296 [Synechococcus sp. PCC 7002]	gi|170077911	33 kDa	0	0.79893	5.8596	0	0.9512	0
1435	D-glycero-D-manno-heptose 1,7-bisphosphate phosphatase [Synechococcus sp. PCC 7002]	gi|170078508	22 kDa	0	3.9947	4.1854	3.9471	3.8048	2.8341
1436	hypothetical protein SYNPCC7002_A0400 [Synechococcus sp. PCC 7002]	gi|170077028	15 kDa	0	3.1957	1.6742	1.3157	0.9512	0.94469
1437	iron compound ABC transporter, ATP-binding protein [Synechococcus sp. PCC 7002]	gi|170076550	31 kDa	4.3873	5.5925	4.1854	0	0	0
1438	ADP-ribosylglycohydrolase [Synechococcus sp. PCC 7002]	gi|170077027	35 kDa	4.3873	2.3968	4.1854	3.9471	5.7072	3.7788
1439	hypothetical protein SYNPCC7002_A0164 [Synechococcus sp. PCC 7002]	gi|170076796	21 kDa	2.9249	0	4.1854	0	0.9512	0.94469
1440	transcriptional regulator [Synechococcus sp. PCC 7002]	gi|170078066	26 kDa	0	0.79893	1.6742	0	0.9512	0.94469
1441	hypothetical protein SYNPCC7002_A0967 [Synechococcus sp. PCC 7002]	gi|170077588	21 kDa	2.9249	1.5979	0.83708	2.6314	0.9512	0
1442	hypothetical protein SYNPCC7002_A1643 [Synechococcus sp. PCC 7002]	gi|170078251	8 kDa	0	2.3968	2.5112	1.3157	0.9512	2.8341
1443	tRNA delta(2)-isopentenylpyrophosphate transferase [Synechococcus sp. PCC 7002]	gi|170077812	33 kDa	0	0.79893	0.83708	1.3157	0.9512	1.8894
1444	hypothetical protein SYNPCC7002_A1651 [Synechococcus sp. PCC 7002]	gi|170078259	15 kDa	1.4624	2.3968	0	0	0.9512	3.7788
1445	hypothetical protein SYNPCC7002_A1217 [Synechococcus sp. PCC 7002]	gi|170077833	16 kDa	0	2.3968	0	0	0.9512	0
1446	sodium-dependent bicarbonate transporter [Synechococcus sp. PCC 7002]	gi|170077096	39 kDa	0	2.3968	0	1.3157	1.9024	0.94469
1447	acetyltransferase [Synechococcus sp. PCC 7002]	gi|170078205	20 kDa	4.3873	2.3968	0	1.3157	1.9024	0.94469
1448	putative lipoprotein [Synechococcus sp. PCC 7002]	gi|170079415	26 kDa	2.9249	1.5979	0.83708	0	0	0
1449	two-component response regulator (RsbV-like) [Synechococcus sp. PCC 7002]	gi|170077528	42 kDa	1.4624	1.5979	1.6742	1.3157	1.9024	0.94469
1450	hypothetical protein SYNPCC7002_A2497 [Synechococcus sp. PCC 7002]	gi|170079092	16 kDa	1.4624	2.3968	5.8596	0	1.9024	1.8894
1451	hypothetical protein SYNPCC7002_A2751 [Synechococcus sp. PCC 7002]	gi|170079342	34 kDa	1.4624	3.9947	7.5337	1.3157	0.9512	1.8894
1452	UDP-N-acetylenolpyruvoylglucosamine reductase [Synechococcus sp. PCC 7002]	gi|170076737	34 kDa	0	1.5979	0	0	0	1.8894
1453	hypothetical protein SYNPCC7002_A1718 [Synechococcus sp. PCC 7002]	gi|170078325	37 kDa	4.3873	3.1957	4.1854	6.5785	1.9024	2.8341
1454	hypothetical protein SYNPCC7002_A0098 [Synechococcus sp. PCC 7002]	gi|170076732	33 kDa	0	2.3968	0.83708	0	2.8536	1.8894
1455	pentapeptide repeat-containing protein [Synechococcus sp. PCC 7002]	gi|170078630	32 kDa	1.4624	3.1957	0.83708	1.3157	2.8536	0.94469
1456	membrane-associated Zn-dependent proteases 1 [Synechococcus sp. PCC 7002]	gi|170078005	54 kDa	1.4624	2.3968	0.83708	0	1.9024	0.94469
1457	ferredoxin [Synechococcus sp. PCC 7002]	gi|170079270	19 kDa	0	0	0.83708	0	1.9024	0.94469
1458	ribonuclease III [Synechococcus sp. PCC 7002]	gi|170076696	27 kDa	0	2.3968	3.3483	1.3157	0	2.8341
1459	ABC transporter ATP-binding protein [Synechococcus sp. PCC 7002]	gi|170076870	34 kDa	2.9249	3.1957	2.5112	1.3157	1.9024	1.8894
1460	hypothetical protein SYNPCC7002_A1673 [Synechococcus sp. PCC 7002]	gi|170078280	15 kDa	2.9249	0.79893	1.6742	2.6314	0.9512	0.94469
1461	hypothetical protein SYNPCC7002_A2521 [Synechococcus sp. PCC 7002]	gi|170079116	25 kDa	2.9249	3.9947	8.3708	1.3157	0.9512	0.94469
1462	RNA-binding protein [Synechococcus sp. PCC 7002]	gi|170078237	11 kDa	1.4624	0.79893	1.6742	6.5785	2.8536	0.94469
1463	hypothetical protein SYNPCC7002_A2685 [Synechococcus sp. PCC 7002]	gi|170079278	43 kDa	0	1.5979	1.6742	0	1.9024	1.8894
1464	RND family efflux transporter MFP subunit [Synechococcus sp. PCC 7002]	gi|170077216	47 kDa	0	0	1.6742	0	0.9512	0.94469
1465	protein phosphatase 2C domain-containing protein [Synechococcus sp. PCC 7002]	gi|170079179	66 kDa	0	3.1957	0.83708	1.3157	0.9512	0
1466	small-conductance mechanosensitive channel [Synechococcus sp. PCC 7002]	gi|170079168	33 kDa	1.4624	3.1957	0	0	0	0
1467	CbiX-like protein [Synechococcus sp. PCC 7002]	gi|170076746	26 kDa	0	0.79893	1.6742	0	0	0.94469
1468	hypothetical protein SYNPCC7002_A1894 [Synechococcus sp. PCC 7002]	gi|170078499	41 kDa	1.4624	1.5979	0	0	0.9512	0
1469	putative ferredoxin (2Fe-2S) [Synechococcus sp. PCC 7002]	gi|170078750	11 kDa	0	2.3968	5.8596	1.3157	4.756	5.6681
1470	permease [Synechococcus sp. PCC 7002]	gi|170078156	37 kDa	0	0	0	0	2.8536	0
1471	PemK-like protein [Synechococcus sp. PCC 7002]	gi|170076555	12 kDa	4.3873	4.7936	8.3708	2.6314	2.8536	3.7788
1472	homoserine kinase [Synechococcus sp. PCC 7002]	gi|170076725	32 kDa	4.3873	3.1957	6.6966	1.3157	1.9024	2.8341
1473	prephenate dehydratase [Synechococcus sp. PCC 7002]	gi|170078999	32 kDa	1.4624	4.7936	5.0225	3.9471	5.7072	5.6681
1474	hypothetical protein SYNPCC7002_A0901 [Synechococcus sp. PCC 7002]	gi|170077523	23 kDa	1.4624	3.1957	3.3483	2.6314	0.9512	1.8894
1475	urease subunit beta [Synechococcus sp. PCC 7002]	gi|170079032	11 kDa	0	3.1957	3.3483	2.6314	1.9024	2.8341
1476	anhydro-N-acetylmuramic acid kinase [Synechococcus sp. PCC 7002]	gi|170079376	42 kDa	2.9249	2.3968	3.3483	2.6314	0.9512	0
1477	hypothetical protein SYNPCC7002_A1209 [Synechococcus sp. PCC 7002]	gi|170077825	26 kDa	2.9249	0.79893	1.6742	0	1.9024	1.8894
1478	isopentenyl pyrophosphate isomerase [Synechococcus sp. PCC 7002]	gi|170077750	37 kDa	4.3873	2.3968	0	2.6314	2.8536	1.8894
1479	hypothetical protein SYNPCC7002_A1536 [Synechococcus sp. PCC 7002]	gi|170078145	24 kDa	0	2.3968	1.6742	0	2.8536	1.8894
1480	alkaline phosphatase [Synechococcus sp. PCC 7002]	gi|170078947	52 kDa	0	1.5979	4.1854	0	0	0
1481	two-component response regulator [Synechococcus sp. PCC 7002]	gi|170076849	28 kDa	2.9249	4.7936	3.3483	1.3157	2.8536	2.8341
1482	MotA/TolQ/ExbB proton channel family protein [Synechococcus sp. PCC 7002]	gi|170077933	24 kDa	2.9249	0.79893	1.6742	1.3157	0.9512	0.94469
1483	hypothetical protein SYNPCC7002_A1685 [Synechococcus sp. PCC 7002]	gi|170078292	16 kDa	1.4624	0.79893	2.5112	1.3157	0.9512	0.94469
1484	twin-arginine translocation protein [Synechococcus sp. PCC 7002]	gi|170077339	11 kDa	0	0.79893	4.1854	2.6314	2.8536	3.7788
1485	bifunctional phosphopantothenoylcysteine decarboxylase/phosphopantothenate synthase [Synechococcus sp. PCC 7002]	gi|170078036	44 kDa	0	2.3968	0.83708	0	1.9024	0
1486	alpha/beta fold family hydrolase [Synechococcus sp. PCC 7002]	gi|170078876	33 kDa	0	3.1957	0.83708	0	0.9512	0
1487	hypothetical protein SYNPCC7002_A1914 [Synechococcus sp. PCC 7002]	gi|170078519	18 kDa	0	3.1957	2.5112	1.3157	4.756	4.7234
1488	hypothetical protein SYNPCC7002_A0184 [Synechococcus sp. PCC 7002]	gi|170076815	12 kDa	0	3.9947	2.5112	1.3157	3.8048	5.6681
1489	hypothetical protein SYNPCC7002_A0386 [Synechococcus sp. PCC 7002]	gi|170077014	11 kDa	0	2.3968	3.3483	0	0	2.8341
1490	hydrogenase expression/formation protein HypE [Synechococcus sp. PCC 7002]	gi|170076825	37 kDa	0	1.5979	1.6742	0	0	0.94469
1491	hypothetical protein SYNPCC7002_A0499 [Synechococcus sp. PCC 7002]	gi|170077124	17 kDa	0	2.3968	4.1854	2.6314	2.8536	2.8341
1492	hypothetical protein SYNPCC7002_A2817 [Synechococcus sp. PCC 7002]	gi|170079403	14 kDa	1.4624	3.9947	4.1854	2.6314	3.8048	2.8341
1493	hypothetical protein SYNPCC7002_A0993 [Synechococcus sp. PCC 7002]	gi|170077614	19 kDa	4.3873	2.3968	1.6742	2.6314	3.8048	1.8894
1494	hypothetical protein SYNPCC7002_A2828 [Synechococcus sp. PCC 7002]	gi|170079414	37 kDa	1.4624	1.5979	0.83708	0	0.9512	1.8894
1495	OppB in a binding protein-dependent transport system [Synechococcus sp. PCC 7002]	gi|170079144	38 kDa	1.4624	3.1957	4.1854	0	0.9512	2.8341
1496	UbiE/COQ5 family methlytransferase [Synechococcus sp. PCC 7002]	gi|170077738	24 kDa	1.4624	1.5979	2.5112	0	0	0
1497	hypothetical protein SYNPCC7002_A0018 [Synechococcus sp. PCC 7002]	gi|170076654	9 kDa	0	2.3968	2.5112	1.3157	1.9024	2.8341
1498	putative mercuric reductase [Synechococcus sp. PCC 7002]	gi|170077930	45 kDa	1.4624	2.3968	0	0	0	0
1499	hypothetical protein SYNPCC7002_A2532 [Synechococcus sp. PCC 7002]	gi|170079126	13 kDa	2.9249	2.3968	3.3483	2.6314	0.9512	1.8894
1500	S-adenosylmethionine-6-N', N'-adenosyl(rRNA) dimethyltransferase [Synechococcus sp. PCC 7002]	gi|170077519	31 kDa	1.4624	0.79893	2.5112	2.6314	0.9512	0.94469
1501	cell division topological specificity factor, MinE [Synechococcus sp. PCC 7002]	gi|170077140	11 kDa	0	0.79893	4.1854	1.3157	2.8536	0.94469
1502	serine esterase [Synechococcus sp. PCC 7002]	gi|170079134	24 kDa	1.4624	3.1957	3.3483	0	0.9512	0.94469
1503	Holliday junction resolvase-like protein [Synechococcus sp. PCC 7002]	gi|170077568	16 kDa	4.3873	2.3968	4.1854	1.3157	1.9024	1.8894
1504	hypothetical protein SYNPCC7002_A1127 [Synechococcus sp. PCC 7002]	gi|170077745	17 kDa	1.4624	2.3968	4.1854	0	1.9024	1.8894
1505	hypothetical protein SYNPCC7002_A2572 [Synechococcus sp. PCC 7002]	gi|170079166	46 kDa	2.9249	3.9947	0	0	0.9512	0.94469
1506	hypothetical protein SYNPCC7002_A0646 [Synechococcus sp. PCC 7002]	gi|170077269	24 kDa	4.3873	3.1957	3.3483	2.6314	1.9024	4.7234
1507	hypothetical protein SYNPCC7002_A2411 [Synechococcus sp. PCC 7002]	gi|170079006	9 kDa	1.4624	2.3968	3.3483	1.3157	2.8536	2.8341
1508	thiopurine S-methyltransferase (tpmt) [Synechococcus sp. PCC 7002]	gi|170078961	22 kDa	1.4624	1.5979	1.6742	0	1.9024	1.8894
1509	ATP synthase b subunit [Synechococcus sp. PCC 7002]	gi|170076620	29 kDa	2.9249	3.9947	5.8596	0	1.9024	2.8341
1510	hypothetical protein SYNPCC7002_A2410 [Synechococcus sp. PCC 7002]	gi|170079005	28 kDa	0	1.5979	1.6742	0	0.9512	0.94469
1511	Preprotein translocase subunit SecE [Synechococcus sp. PCC 7002]	gi|170077652	8 kDa	0	7.1904	3.3483	0	6.6584	6.6128
1512	thymidylate kinase [Synechococcus sp. PCC 7002]	gi|170077931	25 kDa	0	0.79893	0.83708	1.3157	1.9024	2.8341
1513	hypothetical protein SYNPCC7002_A1710 [Synechococcus sp. PCC 7002]	gi|170078317	45 kDa	1.4624	3.1957	0.83708	0	2.8536	0.94469
1514	30S ribosomal protein S21 [Synechococcus sp. PCC 7002]	gi|170078348	7 kDa	2.9249	2.3968	4.1854	3.9471	2.8536	2.8341
1515	hypothetical protein SYNPCC7002_A2503 [Synechococcus sp. PCC 7002]	gi|170079098	26 kDa	0	1.5979	1.6742	0	0	0.94469
1516	hypothetical protein SYNPCC7002_A0943 [Synechococcus sp. PCC 7002]	gi|170077565	17 kDa	0	0	2.5112	0	0	0
1517	hypothetical protein SYNPCC7002_A2094 [Synechococcus sp. PCC 7002]	gi|170078695	8 kDa	2.9249	2.3968	3.3483	5.2628	4.756	3.7788
1518	hypothetical protein SYNPCC7002_A1116 [Synechococcus sp. PCC 7002]	gi|170077734	21 kDa	1.4624	2.3968	5.0225	1.3157	1.9024	1.8894
1519	hypothetical protein SYNPCC7002_A0143 [Synechococcus sp. PCC 7002]	gi|170076775	21 kDa	4.3873	6.3915	2.5112	1.3157	4.756	1.8894
1520	FHA domain-containing protein [Synechococcus sp. PCC 7002]	gi|170077742	47 kDa	1.4624	4.7936	1.6742	0	0.9512	2.8341
1521	hypothetical protein SYNPCC7002_A1659 [Synechococcus sp. PCC 7002]	gi|170078267	17 kDa	2.9249	2.3968	4.1854	3.9471	2.8536	2.8341
1522	hypothetical protein SYNPCC7002_A2254 [Synechococcus sp. PCC 7002]	gi|170078850	13 kDa	0	1.5979	1.6742	2.6314	0.9512	2.8341
1523	uroporphyrin-III C-methyltransferase [Synechococcus sp. PCC 7002]	gi|170079360	28 kDa	0	0	0	0	2.8536	2.8341
1524	hypothetical protein SYNPCC7002_A0812 [Synechococcus sp. PCC 7002]	gi|170077434	35 kDa	0	3.9947	1.6742	0	0.9512	0.94469
1525	ferredoxin-like protein [Synechococcus sp. PCC 7002]	gi|170076880	12 kDa	0	0	0	0	1.9024	1.8894
1526	hypothetical protein SYNPCC7002_A0535 [Synechococcus sp. PCC 7002]	gi|170077160	13 kDa	2.9249	0.79893	0	0	2.8536	0.94469
1527	deoxyuridine 5'-triphosphate nucleotidohydrolase (dUTPase) (dUTP pyrophosphatase) [Synechococcus sp. PCC 7002]	gi|170076787	15 kDa	2.9249	2.3968	2.5112	0	1.9024	1.8894
1528	hypothetical protein SYNPCC7002_A2649 [Synechococcus sp. PCC 7002]	gi|170079243	26 kDa	1.4624	1.5979	1.6742	0	1.9024	0.94469
1529	hypothetical protein SYNPCC7002_A2705 [Synechococcus sp. PCC 7002]	gi|170079298	16 kDa	2.9249	3.9947	2.5112	5.2628	3.8048	3.7788
1530	Type II cytosine-5 DNA methyltransferase [Synechococcus sp. PCC 7002]	gi|302334807	16 kDa	1.4624	0.79893	0.83708	0	1.9024	1.8894
1531	glutamine-binding protein [Synechococcus sp. PCC 7002]	gi|170078777	29 kDa	1.4624	1.5979	4.1854	1.3157	0	0.94469
1532	beta-lactamase [Synechococcus sp. PCC 7002]	gi|170079203	43 kDa	0	0.79893	4.1854	0	0	0
1533	putative lipid kinase [Synechococcus sp. PCC 7002]	gi|170078677	33 kDa	0	3.9947	3.3483	1.3157	2.8536	1.8894
1534	phosphonate-binding protein component PhnD [Synechococcus sp. PCC 7002]	gi|170076613	33 kDa	1.4624	2.3968	1.6742	0	0.9512	0.94469
1535	phosphate transport system substrate-binding protein [Synechococcus sp. PCC 7002]	gi|170078880	37 kDa	5.8498	3.9947	3.3483	5.2628	1.9024	3.7788
1536	SWIM zinc finger domain-containing protein [Synechococcus sp. PCC 7002]	gi|170078742	32 kDa	0	0.79893	1.6742	0	0.9512	0
1537	hypothetical protein SYNPCC7002_A0518 [Synechococcus sp. PCC 7002]	gi|170077143	24 kDa	1.4624	0.79893	1.6742	1.3157	0	0
1538	hypothetical protein SYNPCC7002_A1429 [Synechococcus sp. PCC 7002]	gi|170078038	8 kDa	2.9249	0.79893	4.1854	3.9471	1.9024	0.94469
1539	rRNA methylase [Synechococcus sp. PCC 7002]	gi|170077725	28 kDa	1.4624	0.79893	1.6742	2.6314	0.9512	0.94469
1540	glutathione S-transferase [Synechococcus sp. PCC 7002]	gi|170079369	21 kDa	0	1.5979	2.5112	2.6314	1.9024	1.8894
1541	putative hydrolase, HAD superfamily protein [Synechococcus sp. PCC 7002]	gi|170078627	30 kDa	0	1.5979	3.3483	0	1.9024	0.94469
1542	SsrA-binding protein [Synechococcus sp. PCC 7002]	gi|170077965	18 kDa	1.4624	1.5979	2.5112	0	1.9024	0.94469
1543	bifunctional orotidine 5'-phosphate decarboxylase/orotate phosphoribosyltransferase protein [Synechococcus sp. PCC 7002]	gi|170077235	53 kDa	0	1.5979	1.6742	0	1.9024	0
1544	hypothetical protein SYNPCC7002_A0090 [Synechococcus sp. PCC 7002]	gi|170076724	20 kDa	1.4624	0.79893	2.5112	0	0	0.94469
1545	50S ribosomal protein L35 [Synechococcus sp. PCC 7002]	gi|170078779	8 kDa	0	2.3968	2.5112	0	1.9024	2.8341
1546	hypothetical protein SYNPCC7002_A1306 [Synechococcus sp. PCC 7002]	gi|170077921	27 kDa	2.9249	1.5979	1.6742	1.3157	1.9024	1.8894
1547	thioredoxin-like protein txlA like protein [Synechococcus sp. PCC 7002]	gi|170077860	20 kDa	1.4624	0.79893	2.5112	1.3157	1.9024	1.8894
1548	STAS domain-containing protein [Synechococcus sp. PCC 7002]	gi|170078718	13 kDa	0	2.3968	3.3483	2.6314	3.8048	3.7788
1549	acyl carrier protein [Synechococcus sp. PCC 7002]	gi|170077645	9 kDa	1.4624	4.7936	5.8596	2.6314	4.756	4.7234
1550	dephospho-CoA kinase [Synechococcus sp. PCC 7002]	gi|170079307	23 kDa	2.9249	2.3968	5.0225	0	1.9024	1.8894
1551	inorganic polyphosphate/ATP-NAD kinase [Synechococcus sp. PCC 7002]	gi|170076848	34 kDa	2.9249	0.79893	1.6742	0	0	0
1552	extradiol family dioxygenase [Synechococcus sp. PCC 7002]	gi|170077211	17 kDa	2.9249	0.79893	5.0225	1.3157	1.9024	0.94469
1553	hypothetical protein SYNPCC7002_C0002 [Synechococcus sp. PCC 7002]	gi|170079466	12 kDa	0	0.79893	3.3483	0	0	0
1554	ABC transporter permease [Synechococcus sp. PCC 7002]	gi|170077236	43 kDa	2.9249	0.79893	0.83708	0	0	0
1555	succinate-CoA ligase subunit beta [Synechococcus sp. PCC 7002]	gi|170077513	43 kDa	0	4.7936	0.83708	0	0.9512	1.8894
1556	ABC transporter ATP-binding protein [Synechococcus sp. PCC 7002]	gi|170076570	65 kDa	0	1.5979	0	0	0	0
1557	hypothetical protein SYNPCC7002_A2261 [Synechococcus sp. PCC 7002]	gi|170078857	7 kDa	4.3873	4.7936	4.1854	3.9471	3.8048	4.7234
1558	hypothetical protein SYNPCC7002_A1852 [Synechococcus sp. PCC 7002]	gi|170078458	14 kDa	1.4624	2.3968	3.3483	2.6314	1.9024	3.7788
1559	RecName: Full=Protein translocase subunit SecF	gi|347662495	35 kDa	7.3122	2.3968	1.6742	0	1.9024	0.94469
1560	hypothetical protein SYNPCC7002_A2243 [Synechococcus sp. PCC 7002]	gi|170078839	30 kDa	1.4624	0	1.6742	0	0	0
1561	serine/threonine protein phosphatase [Synechococcus sp. PCC 7002]	gi|170077721	27 kDa	1.4624	0.79893	0.83708	1.3157	1.9024	0
1562	calcium/proton exchanger [Synechococcus sp. PCC 7002]	gi|170076843	38 kDa	1.4624	3.1957	1.6742	0	2.8536	1.8894
1563	histidine triad protein [Synechococcus sp. PCC 7002]	gi|170078819	13 kDa	0	2.3968	5.0225	2.6314	0.9512	2.8341
1564	RdgB/HAM1 family non-canonical purine NTP pyrophosphatase [Synechococcus sp. PCC 7002]	gi|170077226	21 kDa	2.9249	2.3968	3.3483	0	2.8536	2.8341
1565	gamma-glutamyl kinase [Synechococcus sp. PCC 7002]	gi|170078388	40 kDa	2.9249	1.5979	0	0	0	0.94469
1566	SAM dependent methyltransferase [Synechococcus sp. PCC 7002]	gi|170077427	25 kDa	0	0.79893	1.6742	0	0.9512	0.94469
1567	hypothetical protein SYNPCC7002_A0779 [Synechococcus sp. PCC 7002]	gi|170077402	14 kDa	2.9249	1.5979	3.3483	5.2628	4.756	2.8341
1568	pre-peptidase C-terminal domain-containing protein [Synechococcus sp. PCC 7002]	gi|170079374	16 kDa	2.9249	3.1957	2.5112	1.3157	1.9024	2.8341
1569	carbohydrate kinase [Synechococcus sp. PCC 7002]	gi|170077271	55 kDa	0	3.1957	0.83708	0	1.9024	0
1570	hypothetical protein SYNPCC7002_A2278 [Synechococcus sp. PCC 7002]	gi|170078874	27 kDa	0	2.3968	2.5112	0	0	0
1571	hypothetical protein SYNPCC7002_A2820 [Synechococcus sp. PCC 7002]	gi|170079406	28 kDa	5.8498	2.3968	0.83708	0	1.9024	0
1572	2-C-methyl-D-erythritol 2,4-cyclodiphosphate synthase [Synechococcus sp. PCC 7002]	gi|170077783	17 kDa	0	2.3968	4.1854	1.3157	3.8048	2.8341
1573	hypothetical protein SYNPCC7002_A2050 [Synechococcus sp. PCC 7002]	gi|170078654	16 kDa	1.4624	2.3968	2.5112	2.6314	1.9024	3.7788
1574	prephenate dehydrogenase [Synechococcus sp. PCC 7002]	gi|170077300	30 kDa	2.9249	2.3968	1.6742	2.6314	1.9024	2.8341
1575	hypothetical protein SYNPCC7002_A0047 [Synechococcus sp. PCC 7002]	gi|170076682	17 kDa	2.9249	1.5979	1.6742	2.6314	3.8048	0.94469
1576	hypothetical protein SYNPCC7002_A2722 [Synechococcus sp. PCC 7002]	gi|170079314	28 kDa	1.4624	1.5979	0	1.3157	0	1.8894
1577	methionine salvage pathway protein E-2/E-2'' [Synechococcus sp. PCC 7002]	gi|170077178	20 kDa	0	0.79893	2.5112	0	0	0
1578	EAL domain-containing protein [Synechococcus sp. PCC 7002]	gi|170079248	28 kDa	1.4624	1.5979	2.5112	2.6314	1.9024	0.94469
1579	RNA methyltransferase [Synechococcus sp. PCC 7002]	gi|170079356	17 kDa	1.4624	0.79893	1.6742	1.3157	0.9512	0.94469
1580	phosphoribosyltransferase [Synechococcus sp. PCC 7002]	gi|170076984	18 kDa	1.4624	1.5979	2.5112	0	2.8536	1.8894
1581	nodulation efficiency protein D (NfeD) [Synechococcus sp. PCC 7002]	gi|170079180	16 kDa	2.9249	3.1957	1.6742	3.9471	0.9512	1.8894
1582	hypothetical protein SYNPCC7002_A0717 [Synechococcus sp. PCC 7002]	gi|170077340	17 kDa	2.9249	2.3968	1.6742	3.9471	1.9024	1.8894
1583	hypothetical protein SYNPCC7002_A1795 [Synechococcus sp. PCC 7002]	gi|170078401	23 kDa	0	2.3968	5.0225	0	0.9512	1.8894
1584	hypothetical protein SYNPCC7002_A0495 [Synechococcus sp. PCC 7002]	gi|170077120	13 kDa	4.3873	1.5979	1.6742	2.6314	1.9024	2.8341
1585	LuxR family transcriptional regulator [Synechococcus sp. PCC 7002]	gi|170077264	10 kDa	1.4624	0.79893	2.5112	1.3157	0.9512	0.94469
1586	PilT domain-containing protein [Synechococcus sp. PCC 7002]	gi|170077441	16 kDa	1.4624	0.79893	0	2.6314	0.9512	0.94469
1587	hypothetical protein SYNPCC7002_A2687 [Synechococcus sp. PCC 7002]	gi|170079280	36 kDa	0	0	0	1.3157	0.9512	1.8894
1588	cheW-like protein [Synechococcus sp. PCC 7002]	gi|170077987	20 kDa	1.4624	3.1957	3.3483	0	1.9024	5.6681
1589	hypothetical protein SYNPCC7002_A2323 [Synechococcus sp. PCC 7002]	gi|170078918	20 kDa	0	1.5979	0	0	0.9512	2.8341
1590	phosphate ABC transporter substrate-binding protein [Synechococcus sp. PCC 7002]	gi|170077978	33 kDa	2.9249	3.1957	5.0225	3.9471	3.8048	2.8341
1591	hypothetical protein SYNPCC7002_A1688 [Synechococcus sp. PCC 7002]	gi|170078295	11 kDa	1.4624	1.5979	0.83708	1.3157	0.9512	1.8894
1592	leucyl/phenylalanyl-tRNA--protein transferase [Synechococcus sp. PCC 7002]	gi|170078062	22 kDa	1.4624	1.5979	0	0	0.9512	0.94469
1593	hypothetical protein SYNPCC7002_A2729 [Synechococcus sp. PCC 7002]	gi|170079321	23 kDa	1.4624	2.3968	0	1.3157	0.9512	1.8894
1594	hypothetical protein SYNPCC7002_A0179 [Synechococcus sp. PCC 7002]	gi|170076811	10 kDa	0	0	2.5112	0	1.9024	1.8894
1595	hemolysin A [Synechococcus sp. PCC 7002]	gi|170077101	31 kDa	0	1.5979	2.5112	0	0	2.8341
1596	hypothetical protein SYNPCC7002_A1180 [Synechococcus sp. PCC 7002]	gi|170077797	13 kDa	1.4624	2.3968	4.1854	1.3157	0.9512	2.8341
1597	universal stress protein [Synechococcus sp. PCC 7002]	gi|170079283	20 kDa	1.4624	0.79893	1.6742	1.3157	0.9512	1.8894
1598	CP12 domain-containing protein [Synechococcus sp. PCC 7002]	gi|170077880	8 kDa	1.4624	2.3968	3.3483	2.6314	1.9024	4.7234
1599	MORN repeat-containing protein [Synechococcus sp. PCC 7002]	gi|170076559	27 kDa	1.4624	3.1957	6.6966	0	0	0
1600	hypothetical protein SYNPCC7002_A2395 [Synechococcus sp. PCC 7002]	gi|170078990	12 kDa	1.4624	0.79893	1.6742	1.3157	2.8536	0.94469
1601	urease accessory protein E [Synechococcus sp. PCC 7002]	gi|170077343	17 kDa	0	0.79893	1.6742	0	0.9512	0.94469
1602	2-amino-4-hydroxy-6-hydroxymethyldihydropteridine pyrophosphokinase [Synechococcus sp. PCC 7002]	gi|170076934	21 kDa	1.4624	0.79893	3.3483	2.6314	0.9512	0.94469
1603	succinyl-CoA synthetase subunit alpha [Synechococcus sp. PCC 7002]	gi|170077512	34 kDa	2.9249	0.79893	0.83708	1.3157	0.9512	0.94469
1604	PilT domain-containing protein [Synechococcus sp. PCC 7002]	gi|170079655	16 kDa	0	1.5979	2.5112	0	0	0.94469
1605	Na/H+ antiporter [Synechococcus sp. PCC 7002]	gi|170077202	47 kDa	2.9249	7.1904	0	0	2.8536	1.8894
1606	pentapeptide repeat-containing protein [Synechococcus sp. PCC 7002]	gi|170078800	17 kDa	0	3.1957	4.1854	1.3157	0.9512	2.8341
1607	hypothetical protein SYNPCC7002_A1907 [Synechococcus sp. PCC 7002]	gi|170078512	20 kDa	0	0	1.6742	0	0	0
1608	hypothetical protein SYNPCC7002_A1428 [Synechococcus sp. PCC 7002]	gi|170078037	8 kDa	0	0	1.6742	0	0.9512	0.94469
1609	PilT domain-containing protein [Synechococcus sp. PCC 7002]	gi|170078602	15 kDa	0	2.3968	0.83708	0	0	0.94469
1610	HAD family hydrolase [Synechococcus sp. PCC 7002]	gi|170076882	27 kDa	0	2.3968	1.6742	0	0.9512	0.94469
1611	hypothetical protein SYNPCC7002_G0010 [Synechococcus sp. PCC 7002]	gi|170076480	23 kDa	1.4624	3.1957	5.0225	0	0	0.94469
1612	hypothetical protein SYNPCC7002_D0003 [Synechococcus sp. PCC 7002]	gi|170079485	15 kDa	1.4624	3.1957	1.6742	1.3157	0.9512	0
1613	exsB protein [Synechococcus sp. PCC 7002]	gi|170076909	24 kDa	0	2.3968	1.6742	0	1.9024	1.8894
1614	hypothetical protein SYNPCC7002_A2273 [Synechococcus sp. PCC 7002]	gi|170078869	28 kDa	0	1.5979	1.6742	3.9471	2.8536	3.7788
1615	hypothetical protein SYNPCC7002_A2130 [Synechococcus sp. PCC 7002]	gi|170078729	16 kDa	0	1.5979	3.3483	0	0	0
1616	periplasmic binding protein, iron compound transporter [Synechococcus sp. PCC 7002]	gi|170076567	38 kDa	1.4624	0	2.5112	0	0	0
1617	hypothetical protein SYNPCC7002_F0070 [Synechococcus sp. PCC 7002]	gi|170079623	42 kDa	2.9249	4.7936	4.1854	0	0	0.94469
1618	hypothetical protein SYNPCC7002_F0036 [Synechococcus sp. PCC 7002]	gi|170079589	15 kDa	1.4624	1.5979	0	0	0.9512	0.94469
1619	response regulator receiver domain-containing protein [Synechococcus sp. PCC 7002]	gi|170077840	13 kDa	0	1.5979	0	0	0	0.94469
1620	FeS cluster assembly accessory/regulatory protein [Synechococcus sp. PCC 7002]	gi|170076856	13 kDa	0	0	0.83708	2.6314	1.9024	0.94469
1621	phosphatidate cytidylyltransferase [Synechococcus sp. PCC 7002]	gi|170079074	32 kDa	1.4624	1.5979	0	0	0	0
1622	ABC transporter permease [Synechococcus sp. PCC 7002]	gi|170076549	35 kDa	0	1.5979	0.83708	0	0	0
1623	hypothetical protein SYNPCC7002_A2289 [Synechococcus sp. PCC 7002]	gi|170078885	17 kDa	0	0.79893	2.5112	2.6314	1.9024	0
1624	hypothetical protein SYNPCC7002_A0631 [Synechococcus sp. PCC 7002]	gi|170077254	14 kDa	0	0	1.6742	1.3157	0	0.94469
1625	hypothetical protein SYNPCC7002_A1466 [Synechococcus sp. PCC 7002]	gi|170078075	21 kDa	0	0.79893	1.6742	2.6314	0.9512	0.94469
1626	thioesterase family protein [Synechococcus sp. PCC 7002]	gi|170077899	17 kDa	0	0	1.6742	0	0.9512	0
1627	hypothetical protein SYNPCC7002_A2442 [Synechococcus sp. PCC 7002]	gi|170079037	25 kDa	7.3122	1.5979	2.5112	0	0.9512	0
1628	putative lipoprotein [Synechococcus sp. PCC 7002]	gi|170077763	20 kDa	0	1.5979	3.3483	0	1.9024	1.8894
1629	periplasmic binding protein; iron siderophore transporter system [Synechococcus sp. PCC 7002]	gi|170076572	37 kDa	0	1.5979	0	0	0	0
1630	hypothetical protein SYNPCC7002_F0067 [Synechococcus sp. PCC 7002]	gi|170079620	19 kDa	0	1.5979	0.83708	0	0	0
1631	hypothetical protein SYNPCC7002_A1339 [Synechococcus sp. PCC 7002]	gi|170077953	11 kDa	0	0	1.6742	0	0	0.94469
				256	49	133	396	141	154
